# Supplementary material for: Dose-Dependent Effects of GLD-2 and GLD-1 on Germline Differentiation and Dedifferentiation in the Absence of PUF-8
Source: Front Cell Dev Biol. 2020 Jan 24;8:5. doi: 10.3389/fcell.2020.00005 (PMC6992537; doi:10.3389/fcell.2020.00005)
Supplement: Supplementary file 2 [file Table_1.xlsx]

## Sheet: Sheet1
Table S1. A list of genes harboring at leaat one PBE in their 3'UTRs
Gene WB ID	Gene Public Name	Sequence Name	PBE location on 3'UTR		p-value	PBE sequence	CDS Remarks
WBGene00000024	abu-1	AC3.3	33	40	4.79e-05	TGTATATA	C. elegans ABU-1 protein; contains similarity to Pfam domains PF02363 (Cysteine rich repeat) (13), PF06493 (Protein of unknown function (DUF1096)) contains similarity to Interpro domain IPR009475 (Protein of unknown function DUF1096)
WBGene00003231	mex-6	AH6.5	44	51	9.83e-05	TGTACAAA	C. elegans MEX-6 protein; contains similarity to Pfam domain PF00642 Zinc finger C-x8-C-x5-C-x3-H type (and similar) contains similarity to Interpro domain IPR000571 (Zinc finger, CCCH-type)
WBGene00044644	B0205.13	B0205.13	21	28	7.54e-05	TGTAAATA	B0205.13 is enriched in the hypodermis, the intestine, the nervous system, and the sensillum based on tiling array, RNA-seq, and proteomic studies; is affected by several genes including daf-2, glp-1, and daf-12 based on proteomic, RNA-seq, microarray, and tiling array studies; is affected by fourteen chemicals including hydrogen sulfide, methylmercury hydroxide, and 1-methylnicotinamide based on…
WBGene00003765	nlp-27	B0213.2	30	37	7.54e-05	TGTAAATA	C. elegans NLP-27 protein ; contains similarity to Bombyx mori RecName: Full=Chorion class A protein L11;sFlags: Precursor;; SW:P08826
WBGene00003767	nlp-29	B0213.4	61	68	2.17e-05	TGTACATA	C. elegans NLP-29 protein ; contains similarity to Ixodes scapularis Putative secreted salivary gland peptide.; TR:Q5Q982
WBGene00003769	nlp-31	B0213.6	57	64	2.17e-05	TGTACATA	C. elegans NLP-31 protein ; contains similarity to Ixodes scapularis Putative secreted salivary gland peptide.; TR:Q5Q982
WBGene00000211	asm-1	B0252.2	29	36	9.83e-05	TGTACAAA	C. elegans ASM-1 protein; contains similarity to Pfam domain PF00149 Calcineurin-like phosphoesterase contains similarity to Interpro domains IPR011160 (Sphingomyelin phosphodiesterase), IPR004843 (Metallophosphoesterase), IPR011001 (Saposin-like), IPR008139 (Saposin B)
WBGene00002583	let-363	B0261.2b	392	399	4.79e-05	TGTATATA	C. elegans LET-363 protein; contains similarity to Pfam domains PF00454 (Phosphatidylinositol 3- and 4-kinase) , PF02260 (FATC domain) , PF02985 (HEAT repeat) , PF08771 (Rapamycin binding domain) contains similarity to Interpro domains IPR000403 (Phosphatidylinositol 3- and 4-kinase, catalytic), IPR011989 (Armadillo-like helical), IPR009076 (FKBP12-rapamycin-associated protein, FKBP12-rapamycin-b…
WBGene00015102	cpg-2	B0280.5	96	103	4.79e-05	TGTATATA	C. elegans CPG-2 protein; contains similarity to Pfam domain PF01607 Chitin binding Peritrophin-A domain contains similarity to Interpro domain IPR002557 (Chitin binding protein, peritrophin-A)
WBGene00007133	B0284.3	B0284.3	91	98	4.79e-05	TGTATATA	contains similarity to Interpro domain IPR000215 (Protease inhibitor I4, serpin)
WBGene00007138	B0285.6	B0285.6	65	72	7.54e-05	TGTAAATA	contains similarity to Pfam domain PF00939 Sodium:sulfate symporter transmembrane region contains similarity to Interpro domain IPR001898 (Sodium/sulphate symporter)
WBGene00015131	B0303.11	B0303.11	104	111	7.54e-05	TGTAAATA	contains similarity to Pfam domain PF00324 Amino acid permease contains similarity to Interpro domain IPR004841 (Amino acid permease-associated region)
WBGene00015135	cyp-23A1	B0304.3	3532	3539	2.17e-05	TGTACATA	C. elegans CYP-23A1 protein; contains similarity to Pfam domain PF00067 Cytochrome P450 contains similarity to Interpro domains IPR002397 (Cytochrome P450, B-class), IPR001128 (Cytochrome P450), IPR002401 (Cytochrome P450, E-class, group I), IPR002403 (Cytochrome P450, E-class, group IV)
			32	39	4.79e-05	TGTATATA
			4889	4896	9.83e-05	TGTACAAA
WBGene00007144	B0334.4	B0334.4	172	179	2.17e-05	TGTACATA	contains similarity to Pfam domain PF04707 PRELI-like family contains similarity to Interpro domain IPR006797 (MSF1)
WBGene00007167	rbg-3	B0393.2.1	62	69	2.17e-05	TGTACATA	C. elegans RBG-3 protein; contains similarity to Pfam domain PF00566 TBC domain contains similarity to Interpro domain IPR000195 (RabGAP/TBC)
WBGene00007174	B0395.2	B0395.2	83	90	9.83e-05	TGTACAAA	contains similarity to Pfam domain PF03062 MBOAT family contains similarity to Interpro domain IPR004299 (Membrane bound O-acyl transferase, MBOAT)
WBGene00007044	tag-178	B0495.10a	120	127	4.79e-05	TGTATATA	C. elegans TAG-178 protein; contains similarity to Pfam domain PF07002 Copine contains similarity to Interpro domain IPR010734 (Copine)
			211	218	4.79e-05	TGTATATA
			338	345	4.79e-05	TGTATATA
WBGene00015204	B0495.5	B0495.5.1	29	36	7.54e-05	TGTAAATA	contains similarity to Pfam domain PF03190 Protein of unknown function, DUF255 contains similarity to Interpro domains IPR012335 (Thioredoxin fold), IPR004879 (Protein of unknown function DUF255)
WBGene00006814	unc-82	B0496.3b	124	131	7.54e-05	TGTAAATA	C. elegans UNC-82 protein; contains similarity to Pfam domain PF00069 Protein kinase domain contains similarity to Interpro domains IPR002290 (Serine/threonine protein kinase), IPR001245 (Tyrosine protein kinase), IPR017442 (Serine/threonine protein kinase-related), IPR008271 (Serine/threonine protein kinase, active site), IPR000719 (Protein kinase, core)
WBGene00001562	lin-66	B0513.1	6	13	2.17e-05	TGTACATA	C. elegans LIN-66 protein ;
WBGene00015251	B0546.4	B0546.4a	209	216	2.17e-05	TGTACATA	contains similarity to Pfam domain PF03226 Yippee putative zinc-binding protein contains similarity to Interpro domain IPR004910 (Yippee-like protein)
			649	656	2.17e-05	TGTACATA
WBGene00007216	C01A2.4	C01A2.4	5	12	2.17e-05	TGTACATA	contains similarity to Pfam domain PF03357 Snf7 contains similarity to Interpro domain IPR005024 (Snf7)
			28	35	7.54e-05	TGTAAATA
WBGene00001858	hil-7	C01B10.5a	168	175	9.83e-05	TGTACAAA	C. elegans HIL-7 protein ; contains similarity to Tigriopus californicus RecName: Full=Histone H1;; SW:P35060
			168	175	9.83e-05	TGTACAAA
			168	175	9.83e-05	TGTACAAA
WBGene00015283	C01B10.9	C01B10.9	31	38	7.54e-05	TGTAAATA	contains similarity to Pfam domain PF01663 Type I phosphodiesterase / nucleotide pyrophosphatase contains similarity to Interpro domains IPR002591 (Type I phosphodiesterase/nucleotide pyrophosphatase/phosphate transferase), IPR017849 (Alkaline phosphatase-like, alpha/beta/alpha)
WBGene00015294	C01C10.2	C01C10.2b	292	299	9.83e-05	TGTACAAA	contains similarity to Brugia malayi Hypothetical 24.1 kDa protein C01C10.2 in chromosome X, putative.; TR:A8NWZ3
WBGene00006808	unc-76	C01G10.11b.1	368	375	9.83e-05	TGTACAAA	C. elegans UNC-76 protein; contains similarity to Pfam domain PF07763 FEZ-like protein contains similarity to Interpro domain IPR011680 (FEZ-like)
WBGene00007226	C01G6.4	C01G6.4	113	120	2.17e-05	TGTACATA	contains similarity to Pfam domain PF00097 Zinc finger, C3HC4 type (RING finger) contains similarity to Interpro domains IPR001841 (Zinc finger, RING-type), IPR013083 (Zinc finger, RING/FYVE/PHD-type)
			97	104	4.79e-05	TGTATATA
WBGene00000540	cln-3.2	C01G8.2.1	37	44	2.17e-05	TGTACATA	C. elegans CLN-3.2 protein; contains similarity to Pfam domain PF02487 CLN3 protein contains similarity to Interpro domain IPR003492 (Batten's disease protein Cln3)
			37	44	2.17e-05	TGTACATA
WBGene00000965	dhs-1	C01G8.3	35	42	4.79e-05	TGTATATA	C. elegans DHS-1 protein; contains similarity to Pfam domain PF00106 short chain dehydrogenase contains similarity to Interpro domains IPR002347 (Glucose/ribitol dehydrogenase), IPR002198 (Short-chain dehydrogenase/reductase SDR), IPR016040 (NAD(P)-binding)
WBGene00001022	dnj-4	C01G8.4	106	113	9.83e-05	TGTACAAA	C. elegans DNJ-4 protein; contains similarity to Pfam domain PF00226 DnaJ domain contains similarity to Interpro domains IPR015609 (Molecular chaperone, heat shock protein, Hsp40, DnaJ), IPR001623 (Heat shock protein DnaJ, N-terminal), IPR003095 (Heat shock protein DnaJ)
WBGene00015332	tyr-1	C02C2.1	163	170	9.83e-05	TGTACAAA	C. elegans TYR-1 protein; contains similarity to Pfam domains PF01549 (ShK domain-like) (2), PF00264 (Common central domain of tyrosinase) contains similarity to Interpro domains IPR008922 (Di-copper centre-containing), IPR002227 (Tyrosinase), IPR003582 (Metridin-like ShK toxin)
WBGene00015337	gsto-2	C02D5.3a	41	48	7.54e-05	TGTAAATA	C. elegans GSTO-2 protein; contains similarity to Pfam domains PF00043 (Glutathione S-transferase, C-terminal domain) (2), PF02798 (Glutathione S-transferase, N-terminal domain) (2)contains similarity to Interpro domains IPR012335 (Thioredoxin fold), IPR004046 (Glutathione S-transferase, C-terminal), IPR004045 (Glutathione S-transferase, N-terminal), IPR005442 (Glutathione S-transferase, omega-cl…
WBGene00004099	pqn-5	C03A7.4	27	34	4.79e-05	TGTATATA	C. elegans PQN-5 protein; contains similarity to Pfam domains PF02363 (Cysteine rich repeat) (9), PF06493 (Protein of unknown function (DUF1096)) contains similarity to Interpro domains IPR003341 (Cysteine rich repeat, tripleX), IPR009475 (Protein of unknown function DUF1096)
WBGene00001194	egl-27	C04A2.3a	138	145	7.54e-05	TGTAAATA	C. elegans EGL-27 protein; contains similarity to Pfam domains PF00320 (GATA zinc finger) , PF01448 (ELM2 domain) , PF00249 (Myb-like DNA-binding domain) , PF01426 (BAH domain) contains similarity to Interpro domains IPR013088 (Zinc finger, NHR/GATA-type), IPR000949 (ELM2), IPR001005 (SANT, DNA-binding), IPR014778 (Myb, DNA-binding), IPR001025 (Bromo adjacent region), IPR000679 (Zinc finger, GATA…
WBGene00015423	C04E6.7	C04E6.7	167	174	2.17e-05	TGTACATA	contains similarity to Pfam domain PF00702 haloacid dehalogenase-like hydrolase contains similarity to Interpro domains IPR011945 (Predicted HAD-superfamily phosphatase, subfamily IA/Epoxide hydrolase, N-terminal), IPR005833 (Haloacid dehydrogenase/epoxide hydrolase), IPR016059 (ATP-dependent DNA ligase, conserved site), IPR005834 (Haloacid dehalogenase-like hydrolase), IPR006402 (HAD-superfamily…
WBGene00007330	C05C10.3	C05C10.3.1	32	39	7.54e-05	TGTAAATA	contains similarity to Pfam domain PF01144 Coenzyme A transferase contains similarity to Interpro domains IPR012792 (3-oxoacid CoA-transferase, subunit A), IPR004164 (Coenzyme A transferase active site), IPR012791 (3-oxoacid CoA-transferase, subunit B), IPR004163 (Coenzyme A transferase binding site), IPR014388 (3-oxoacid CoA-transferase), IPR004165 (Coenzyme A transferase)
WBGene00007333	ufd-3	C05C10.6a	33	40	4.79e-05	TGTATATA	C. elegans UFD-3 protein; contains similarity to Pfam domains PF08324 (PUL domain) , PF00400 (WD domain, G-beta repeat) (4), PF09070 (PFU (PLAA family ubiquitin binding)) contains similarity to Interpro domains IPR015155 (PFU (PLAA family ubiquitin binding)), IPR001680 (WD40 repeat), IPR015943 (WD40/YVTN repeat-like), IPR013535 (PUL)
WBGene00001795	gtl-1	C05C12.3	71	78	4.79e-05	TGTATATA	C. elegans GTL-1 protein; contains similarity to Pfam domain PF00520 Ion transport protein contains similarity to Interpro domain IPR005821 (Ion transport)
WBGene00006516	vps-16	C05D11.2.1	16	23	7.54e-05	TGTAAATA	C. elegans VPS-16 protein; contains similarity to Pfam domains PF04841 (Vps16, N-terminal region) , PF04840 (Vps16, C-terminal region) contains similarity to Interpro domains IPR006926 (Vps16, N-terminal), IPR016534 (Vacuolar protein sorting-associated protein 16), IPR006925 (Vps16, C-terminal)
WBGene00000900	daf-4	C05D2.1a	165	172	4.79e-05	TGTATATA	C. elegans DAF-4 protein; contains similarity to Pfam domain PF00069 Protein kinase domain contains similarity to Interpro domains IPR002290 (Serine/threonine protein kinase), IPR001245 (Tyrosine protein kinase), IPR017442 (Serine/threonine protein kinase-related), IPR008271 (Serine/threonine protein kinase, active site), IPR000719 (Protein kinase, core)
WBGene00015494	C05E11.3	C05E11.3	383	390	2.17e-05	TGTACATA	contains similarity to Mus musculus RecName: Full=Lysosomal-associated transmembrane protein 4A;sAltName: Full=Golgi 4-transmembrane spanning transporter;sAltName: Full=Mouse transporter protein;sShort=MTP;; SW:Q60961
WBGene00007344	C05E7.2	C05E7.2	32	39	7.54e-05	TGTAAATA	C05E7.2 is enriched in the DA neuron and the hypodermis based on tiling array, RNA-seq, and microarray studies; is affected by several genes including daf-16, daf-2, and glp-1 based on proteomic, tiling array, RNA-seq, and microarray studies; is affected by eighteen chemicals including Heme, aldicarb, and 1-methylnicotinamide based on microarray and RNA-seq studies; is predicted to encode a prote…
WBGene00007349	C05G5.3	C05G5.3	142	149	9.83e-05	TGTACAAA	contains similarity to Homo sapiens Isoform 1 of Matrix-remodeling-associated protein 7; ENSEMBL:ENSP00000348050
WBGene00015497	nhr-76	C05G6.1	20	27	2.17e-05	TGTACATA	C. elegans NHR-76 protein; contains similarity to Pfam domains PF00104 (Ligand-binding domain of nuclear hormone receptor) , PF00105 (Zinc finger, C4 type (two domains)) contains similarity to Interpro domains IPR013088 (Zinc finger, NHR/GATA-type), IPR008946 (Nuclear hormone receptor, ligand-binding), IPR001628 (Zinc finger, nuclear hormone receptor-type), IPR000536 (Nuclear hormone receptor, li…
WBGene00015505	C06A5.8	C06A5.8a	9	16	7.54e-05	TGTAAATA	contains similarity to Pfam domain PF00097 Zinc finger, C3HC4 type (RING finger) contains similarity to Interpro domains IPR001841 (Zinc finger, RING-type), IPR013083 (Zinc finger, RING/FYVE/PHD-type)
			63	70	7.54e-05	TGTAAATA
WBGene00015514	C06A8.3	C06A8.3	36	43	7.54e-05	TGTAAATA	contains similarity to Pfam domain PF02520 Domain of unknown function DUF148 contains similarity to Interpro domain IPR003677 (Protein of unknown function DUF148)
WBGene00001552	gcy-32	C06B3.8	18	25	9.83e-05	TGTACAAA	C. elegans GCY-32 protein; contains similarity to Pfam domains PF07700 (Heme NO binding) , PF07701 (Heme NO binding associated) , PF00211 (Adenylate and Guanylate cyclase catalytic domain) contains similarity to Interpro domains IPR001054 (Adenylyl cyclase class-3/4/guanylyl cyclase), IPR011644 (Haem NO binding), IPR011645 (Haem NO binding associated)
WBGene00007382	C06C6.8	C06C6.8	16	23	7.54e-05	TGTAAATA	contains similarity to Pfam domain PF06678 Protein of unknown function (DUF1179) contains similarity to Interpro domain IPR009564 (Protein of unknown function DUF1179)
WBGene00015519	C06E1.3	C06E1.3	275	282	7.54e-05	TGTAAATA	contains similarity to Drosophila melanogaster Flybase gene name is mol-PD;; FLYBASE:CG4482
WBGene00015522	C06E1.7	C06E1.7	15	22	9.83e-05	TGTACAAA	contains similarity to Pfam domain PF01531 Glycosyl transferase family 11 contains similarity to Interpro domain IPR002516 (Glycosyl transferase, family 11)
WBGene00015529	C06E2.5	C06E2.5.2	196	203	7.54e-05	TGTAAATA	C06E2.5 is enriched in the Z1.p, the Z4.a, the gon_male_dtc anterior, the gon_male_dtc posterior, and the intestine based on RNA-seq and microarray studies; is affected by several genes including eat-2, npr-1, and pgl-1 based on microarray and RNA-seq studies; is affected by ten chemicals including Rotenone, manganese chloride, and stavudine based on RNA-seq and microarray studies
WBGene00002228	klp-18	C06G3.2	24	31	7.54e-05	TGTAAATA	C. elegans KLP-18 protein; contains similarity to Pfam domain PF00225 Kinesin motor domain contains similarity to Interpro domain IPR001752 (Kinesin, motor region)
WBGene00001821	ham-2	C07A12.1a	217	224	2.17e-05	TGTACATA	C. elegans HAM-2 protein; contains similarity to Pfam domain PF00096 Zinc finger, C2H2 type contains similarity to Interpro domains IPR015880 (Zinc finger, C2H2-like), IPR007087 (Zinc finger, C2H2-type)
WBGene00015566	C07D10.1	C07D10.1	76	83	7.54e-05	TGTAAATA	contains similarity to Pfam domain PF00646 F-box domain contains similarity to Interpro domain IPR001810 (Cyclin-like F-box)
WBGene00000223	atf-7	C07G2.2a.1	478	485	9.83e-05	TGTACAAA	atf-7 exhibits mitogen-activated protein kinase binding activity; is involved in several processes, including defense response to Gram-negative bacterium, regulation of cellular biosynthetic process, and regulation of defense response; localizes to the nucleus; is expressed in the body wall musculature, the hypodermis, the intestine, the nervous system, and the rectal epithelial cell
			478	485	9.83e-05	TGTACAAA
			478	485	9.83e-05	TGTACAAA
WBGene00001174	egl-5	C08C3.1b	58	65	7.54e-05	TGTAAATA	C. elegans EGL-5 protein; contains similarity to Pfam domain PF00046 Homeobox domain contains similarity to Interpro domains IPR001356 (Homeobox), IPR012287 (Homeodomain-related)
WBGene00006582	tmd-2	C08D8.2b	390	397	9.83e-05	TGTACAAA	C. elegans TMD-2 protein; contains similarity to Pfam domain PF03250 Tropomodulin contains similarity to Interpro domain IPR004934 (Tropomodulin)
WBGene00007453	fbxa-98	C08F11.5	46	53	4.79e-05	TGTATATA	C. elegans FBXA-98 protein; contains similarity to Pfam domains PF01827 (FTH domain) , PF00646 (F-box domain) contains similarity to Interpro domains IPR001810 (Cyclin-like F-box), IPR002900 (Protein of unknown function DUF38, Caenorhabditis species)
WBGene00007455	ugt-22	C08F11.8	243	250	4.79e-05	TGTATATA	C. elegans UGT-22 protein; contains similarity to Pfam domain PF00201 UDP-glucoronosyl and UDP-glucosyl transferase contains similarity to Interpro domain IPR002213 (UDP-glucuronosyl/UDP-glucosyltransferase)
			172	179	9.83e-05	TGTACAAA
WBGene00015624	C09B8.5	C09B8.5	110	117	2.17e-05	TGTACATA	C09B8.5 is enriched in the germ line based on RNA-seq studies; is affected by several genes including daf-2, age-1, and let-60 based on microarray, tiling array, and RNA-seq studies; is affected by seven chemicals including aldicarb, methylmercury hydroxide, and Alovudine based on microarray and RNA-seq studies
WBGene00015634	C09D4.3	C09D4.3	199	206	7.54e-05	TGTAAATA	contains similarity to Pfam domain PF00069 Protein kinase domain contains similarity to Interpro domains IPR017441 (Protein kinase ATP binding, conserved site), IPR002290 (Serine/threonine protein kinase), IPR000719 (Protein kinase, core), IPR017442 (Serine/threonine protein kinase-related)
WBGene00004215	ptp-3	C09D8.1a	323	330	7.54e-05	TGTAAATA	C. elegans PTP-3 protein; contains similarity to Pfam domains PF00047 (Immunoglobulin domain) , PF00102 (Protein-tyrosine phosphatase) (2), PF00041 (Fibronectin type III domain) (8), PF07679 (Immunoglobulin I-set domain) (2)contains similarity to Interpro domains IPR003598 (Immunoglobulin subtype 2), IPR003595 (Protein-tyrosine phosphatase, catalytic), IPR008957 (Fibronectin, type III-like fold),…
WBGene00015650	C09G4.2	C09G4.2c	328	335	4.79e-05	TGTATATA	contains similarity to Pfam domains PF00069 (Protein kinase domain) , PF00027 (Cyclic nucleotide-binding domain) contains similarity to Interpro domains IPR017441 (Protein kinase ATP binding, conserved site), IPR002290 (Serine/threonine protein kinase), IPR008271 (Serine/threonine protein kinase, active site), IPR000719 (Protein kinase, core), IPR000595 (Cyclic nucleotide-binding), IPR001245 (Tyr…
			385	392	9.83e-05	TGTACAAA
WBGene00007500	nasp-1	C09H10.6	122	129	4.79e-05	TGTATATA	C. elegans NASP-1 protein; contains similarity to Interpro domain IPR013026 (Tetratricopeptide region)
WBGene00015660	C09H5.2	C09H5.2a	16	23	4.79e-05	TGTATATA	contains similarity to Pfam domains PF00689 (Cation transporting ATPase, C-terminus) , PF00122 (E1-E2 ATPase) , PF00702 (haloacid dehalogenase-like hydrolase) , PF00690 (Cation transporter/ATPase, N-terminus) contains similarity to Interpro domains IPR008250 (E1-E2 ATPase-associated region), IPR006069 (ATPase, P-type cation exchange, alpha subunit), IPR004014 (ATPase, P-type cation-transporter, N…
			139	146	4.79e-05	TGTATATA
WBGene00000911	daf-15	C10C5.6b	197	204	7.54e-05	TGTAAATA	C. elegans DAF-15 protein; contains similarity to Interpro domains IPR004083 (Regulatory associated protein of TOR), IPR015943 (WD40/YVTN repeat-like)
WBGene00002192	kin-4	C10C6.1	48	55	7.54e-05	TGTAAATA	C. elegans KIN-4 protein; contains similarity to Pfam domains PF08926 (Domain of unknown function (DUF1908)) , PF00595 (PDZ domain (Also known as DHR or GLGF)) , PF00069 (Protein kinase domain) contains similarity to Interpro domains IPR002290 (Serine/threonine protein kinase), IPR008271 (Serine/threonine protein kinase, active site), IPR015022 (Region of unknown function DUF1908), IPR000719 (Pro…
WBGene00007515	C10C6.7	C10C6.7a	108	115	7.54e-05	TGTAAATA	contains similarity to Nephroselmis olivacea Hypothetical protein.; TR:Q9T3X5
WBGene00003954	pcm-1	C10F3.5a	21	28	2.17e-05	TGTACATA	C. elegans PCM-1 protein; contains similarity to Pfam domain PF01135 Protein-L-isoaspartate(D-aspartate) O-methyltransferase (PCMT) contains similarity to Interpro domain IPR000682 (Protein-L-isoaspartate(D-aspartate) O-methyltransferase)
			99	106	2.17e-05	TGTACATA
WBGene00015684	C10G8.8	C10G8.8a	150	157	7.54e-05	TGTAAATA	contains similarity to Drosophila melanogaster Flybase gene name is CG2839-PA;; FLYBASE:CG2839
WBGene00015702	C11D2.4	C11D2.4	10	17	7.54e-05	TGTAAATA	contains similarity to Bos taurus RecName: Full=UPF0553 protein C9orf64 homolog;; SW:Q1JP73
WBGene00007552	C13C12.2	C13C12.2	228	235	7.54e-05	TGTAAATA	contains similarity to Brugia malayi Putative uncharacterized protein.; TR:A8QDZ0
WBGene00007550	C13C4.6	C13C4.6	25	32	7.54e-05	TGTAAATA	contains similarity to Pfam domain PF07690 Major Facilitator Superfamily contains similarity to Interpro domain IPR011701 (Major facilitator superfamily MFS-1)
WBGene00015741	C13F10.1	C13F10.1b	224	231	7.54e-05	TGTAAATA	C13F10.1 is enriched in the muscular system, the nervous system, and the sensillum based on microarray, tiling array, and RNA-seq studies; is affected by several genes including clk-1, pgl-1, and alg-1 based on microarray and RNA-seq studies; is affected by five chemicals including Rotenone, Mianserin, and stavudine based on RNA-seq and microarray studies
WBGene00007554	pptr-2	C13G3.3a.1	177	184	7.54e-05	TGTAAATA	C. elegans PPTR-2 protein; contains similarity to Pfam domain PF01603 Protein phosphatase 2A regulatory B subunit (B56 family) contains similarity to Interpro domain IPR002554 (Protein phosphatase 2A, regulatory B subunit, B56)
WBGene00007573	C14B1.2	C14B1.2	24	31	7.54e-05	TGTAAATA	contains similarity to Bacillus anthracis Hypothetical protein.; TR:Q81T15
WBGene00006474	tag-125	C14B1.4	60	67	4.79e-05	TGTATATA	C. elegans TAG-125 protein; contains similarity to Pfam domain PF00400 WD domain, G-beta repeat contains similarity to Interpro domains IPR016346 (Guanine nucleotide-binding protein, beta subunit), IPR001680 (WD40 repeat), IPR011042 (Six-bladed beta-propeller, TolB-like), IPR015943 (WD40/YVTN repeat-like)
WBGene00004042	plk-1	C14B9.4a.1	193	200	7.54e-05	TGTAAATA	C. elegans PLK-1 protein; contains similarity to Pfam domains PF00659 (POLO box duplicated region) (2), PF00069 (Protein kinase domain) contains similarity to Interpro domains IPR017441 (Protein kinase ATP binding, conserved site), IPR002290 (Serine/threonine protein kinase), IPR008271 (Serine/threonine protein kinase, active site), IPR017450 (POLO box), IPR000719 (Protein kinase, core), IPR00124…
			193	200	7.54e-05	TGTAAATA
			193	200	7.54e-05	TGTAAATA
WBGene00001565	gei-8	C14B9.6c	219	226	7.54e-05	TGTAAATA	C. elegans GEI-8 protein; contains similarity to Pfam domain PF00249 Myb-like DNA-binding domain contains similarity to Interpro domains IPR001005 (SANT, DNA-binding), IPR014778 (Myb, DNA-binding)
WBGene00007609	C15C8.7	C15C8.7	148	155	2.17e-05	TGTACATA	contains similarity to Rhizobium loti Hypothetical protein mll2265.; TR:Q98IT0
WBGene00015801	C15H9.5	C15H9.5.1	210	217	4.79e-05	TGTATATA	contains similarity to Pfam domain PF06814 Lung seven transmembrane receptor contains similarity to Interpro domain IPR009637 (Transmembrane receptor, eukaryota)
WBGene00015824	C16B8.4	C16B8.4	169	176	7.54e-05	TGTAAATA	contains similarity to Interpro domain IPR003961 (Fibronectin, type III)
WBGene00001145	eat-16	C16C2.2a.1	418	425	9.83e-05	TGTACAAA	C. elegans EAT-16 protein; contains similarity to Pfam domains PF00631 (GGL domain) , PF00615 (Regulator of G protein signaling domain) , PF00610 (Domain found in Dishevelled, Egl-10, and Pleckstrin) contains similarity to Interpro domains IPR011991 (Winged helix repressor DNA-binding), IPR000342 (Regulator of G protein signalling), IPR015898 (G-protein, gamma-like subunit), IPR000591 (Pleckstrin…
			93	100	7.54e-05	TGTAAATA
WBGene00002123	inx-1	C16E9.4a	213	220	9.83e-05	TGTACAAA	C. elegans INX-1 protein; contains similarity to Pfam domain PF00876 Innexin contains similarity to Interpro domain IPR000990 (Innexin)
WBGene00007645	C17E4.6	C17E4.6	61	68	2.17e-05	TGTACATA	contains similarity to Pfam domains PF08265 (YL1 nuclear protein C-terminal domain) , PF05764 (YL1 nuclear protein) contains similarity to Interpro domains IPR013272 (YL1 nuclear, C-terminal), IPR008895 (YL1 nuclear)
WBGene00000383	cdc-14	C17G10.4c.1	168	175	7.54e-05	TGTAAATA	C. elegans CDC-14 protein; contains similarity to Pfam domain PF00782 Dual specificity phosphatase, catalytic domain contains similarity to Interpro domains IPR016130 (Protein-tyrosine phosphatase, active site), IPR000387 (Protein-tyrosine phosphatase), IPR000340 (Protein-tyrosine phosphatase, dual specificity)
WBGene00015928	C17H12.2	C17H12.2	24	31	2.17e-05	TGTACATA	contains similarity to Brugia malayi Protein C17H12.2, putative.; TR:A8PQP9
WBGene00015930	C17H12.4	C17H12.4	18	25	4.79e-05	TGTATATA	contains similarity to Pfam domain PF00135 Carboxylesterase contains similarity to Interpro domain IPR002018 (Carboxylesterase, type B)
WBGene00002215	klc-2	C18C4.10b.1	346	353	7.54e-05	TGTAAATA	C. elegans KLC-2 protein; contains similarity to Pfam domains PF00515 (Tetratricopeptide repeat) (3), PF07719 (Tetratricopeptide repeat) (2), PF09311 (Rab5 binding) contains similarity to Interpro domains IPR011990 (Tetratricopeptide-like helical), IPR015792 (Kinesin light chain repeat), IPR002151 (Kinesin light chain), IPR001440 (Tetratricopeptide TPR-1), IPR015390 (Rabaptin, GTPase-Rab5 binding…
WBGene00015978	C18E3.2	C18E3.2	108	115	9.83e-05	TGTACAAA	C18F10.7 is an ortholog of human ANKRD13A (ankyrin repeat domain 13A), ANKRD13B (ankyrin repeat domain 13B), and ANKRD13D (ankyrin repeat domain 13D); is expressed in several tissues, including the alimentary system, the hypodermis, the muscular system, the nervous system, and the reproductive system; is predicted to encode a protein with the following domains: Ankyrin repeat, Ankyrin repeat-cont…
WBGene00015978	C18F10.7	C18F10.7a.1	17	24	2.17e-05	TGTACATA	contains similarity to Pfam domains PF00023 (Ankyrin repeat) (2), PF02809 (Ubiquitin interaction motif) (2)contains similarity to Interpro domains IPR003903 (Ubiquitin interacting motif), IPR002110 (Ankyrin)
			1233	1240	2.17e-05	TGTACATA
WBGene00015993	C18H7.1	C18H7.1	180	187	4.79e-05	TGTATATA	contains similarity to Pfam domain PF00092 von Willebrand factor type A domain contains similarity to Interpro domain IPR002035 (von Willebrand factor, type A)
			23	30	7.54e-05	TGTAAATA
WBGene00016017	C23G10.11	C23G10.11	18	25	4.79e-05	TGTATATA	C23G10.11 is expressed in the hypodermal cell
WBGene00007691	C23H4.2	C23H4.2	16	23	7.54e-05	TGTAAATA	contains similarity to Pfam domain PF00135 Carboxylesterase contains similarity to Interpro domains IPR008262 (Lipase, active site), IPR002018 (Carboxylesterase, type B)
WBGene00016029	C24A1.2	C24A1.2b	2	9	2.17e-05	TGTACATA	contains similarity to Pfam domain PF00178 Ets-domain contains similarity to Interpro domains IPR000418 (Ets), IPR011991 (Winged helix repressor DNA-binding)
WBGene00016045	spas-1	C24B5.2a	41	48	9.83e-05	TGTACAAA	C. elegans SPAS-1 protein; contains similarity to Pfam domain PF00004 ATPase family associated with various cellular activities (AAA) contains similarity to Interpro domains IPR003959 (AAA ATPase, core), IPR003960 (AAA ATPase, conserved site), IPR003593 (AAA+ ATPase, core)
WBGene00016052	dod-3	C24B9.9	45	52	4.79e-05	TGTATATA	C. elegans DOD-3 protein ;
WBGene00016066	C24G7.4	C24G7.4	6	13	7.54e-05	TGTAAATA	contains similarity to Pfam domain PF00858 Amiloride-sensitive sodium channel contains similarity to Interpro domain IPR001873 (Na+ channel, amiloride-sensitive)
WBGene00007707	C25A1.5	C25A1.5	117	124	2.17e-05	TGTACATA	contains similarity to Pfam domain PF04116 Fatty acid hydroxylase superfamily contains similarity to Interpro domains IPR006694 (Fatty acid hydroxylase), IPR001199 (Cytochrome b5)
WBGene00016118	C25H3.9	C25H3.9a	174	181	7.54e-05	TGTAAATA	contains similarity to Brugia malayi RH17657p, putative.; TR:A8P380
			212	219	7.54e-05	TGTAAATA
WBGene00003625	nhr-31	C26B2.3a.1	49	56	2.17e-05	TGTACATA	C. elegans NHR-31 protein; contains similarity to Pfam domains PF00104 (Ligand-binding domain of nuclear hormone receptor) , PF00105 (Zinc finger, C4 type (two domains)) contains similarity to Interpro domains IPR008946 (Nuclear hormone receptor, ligand-binding), IPR001723 (Steroid hormone receptor), IPR000324 (Vitamin D receptor), IPR013088 (Zinc finger, NHR/GATA-type), IPR001628 (Zinc finger, n…
			1269	1276	2.17e-05	TGTACATA
WBGene00016146	C26F1.1	C26F1.1a	23	30	4.79e-05	TGTATATA	C26F1.1 is enriched in several tissues, including the alimentary system, the hypodermis, and the nervous system based on tiling array, RNA-seq, and microarray studies; is affected by several genes including daf-16, daf-2, and daf-12 based on microarray and RNA-seq studies; is affected by eleven chemicals including methylmercuric chloride, Rotenone, and D-glucose based on microarray and RNA-seq st…
			23	30	4.79e-05	TGTATATA
WBGene00007773	C27C12.3	C27C12.3	380	387	7.54e-05	TGTAAATA	contains similarity to Interpro domain IPR010149 ()
WBGene00007774	C27C12.4	C27C12.4	14	21	7.54e-05	TGTAAATA	contains similarity to Pfam domain PF05978 Eukaryotic protein of unknown function (DUF895) contains similarity to Interpro domain IPR010291 (Protein of unknown function DUF895, eukaryotic)
WBGene00016167	C27F2.5	C27F2.5.1	130	137	7.54e-05	TGTAAATA	contains similarity to Pfam domain PF04157 EAP30/Vps36 family contains similarity to Interpro domains IPR007286 (EAP30), IPR016689 (ESCRT-2 complex, Snf8)
WBGene00016172	C27H5.2	C27H5.2b	267	274	7.54e-05	TGTAAATA	contains similarity to Trichomonas vaginalis G3 Viral A-type inclusion protein, putative.; TR:A2DLG0
			323	330	7.54e-05	TGTAAATA
WBGene00006450	tag-77	C28C12.10	138	145	2.17e-05	TGTACATA	C. elegans TAG-77 protein; contains similarity to Pfam domains PF01363 (FYVE zinc finger) , PF00169 (PH domain) contains similarity to Interpro domains IPR000219 (Dbl homology (DH) domain), IPR001849 (Pleckstrin-like), IPR000306 (Zinc finger, FYVE-type), IPR013083 (Zinc finger, RING/FYVE/PHD-type), IPR011993 (Pleckstrin homology-type), IPR017455 (Zinc finger, FYVE-related)
WBGene00016178	C28C12.2	C28C12.2	84	91	7.54e-05	TGTAAATA	mesp-1 is expressed in the germ line.
WBGene00003633	nhr-43	C29E6.5	49	56	7.54e-05	TGTAAATA	C. elegans NHR-43 protein; contains similarity to Pfam domain PF00105 Zinc finger, C4 type (two domains) contains similarity to Interpro domains IPR013088 (Zinc finger, NHR/GATA-type), IPR001628 (Zinc finger, nuclear hormone receptor-type), IPR000536 (Nuclear hormone receptor, ligand-binding, core), IPR016355 (Orphan nuclear receptor Fushi-tarazu factor 1)
WBGene00007808	C29F4.2	C29F4.2	76	83	7.54e-05	TGTAAATA	contains similarity to Pfam domain PF01062 Bestrophin contains similarity to Interpro domain IPR000615 (Bestrophin)
WBGene00016234	C29G2.6	C29G2.6	41	48	2.17e-05	TGTACATA	C29G2.6 is enriched in dopaminergic neurons, the germline precursor cell, and the hypodermis based on tiling array studies; is affected by several genes including daf-16, daf-2, and age-1 based on microarray and RNA-seq studies; is affected by seven chemicals including Rotenone, manganese chloride, and D-glucose based on RNA-seq and microarray studies; is predicted to encode a protein with the fo…
WBGene00016237	C29H12.6	C29H12.6	97	104	9.83e-05	TGTACAAA	C29H12.6 is expressed in the marginal cell
WBGene00016247	C30B5.6	C30B5.6	1074	1081	7.54e-05	TGTAAATA	contains similarity to Saccharomyces cerevisiae ER membrane protein involved in the translocation of soluble secretory proteins and insertion of membrane proteins into the ER membrane; may also have a role in the stress response but has only partial functional overlap with WSC1-3; SGD:YHL028W
WBGene00016266	C30F12.7	C30F12.7	86	93	7.54e-05	TGTAAATA	contains similarity to Pfam domain PF00180 Isocitrate/isopropylmalate dehydrogenase contains similarity to Interpro domains IPR004434 (Isocitrate dehydrogenase NAD-dependent, mitochondrial), IPR001804 (Isocitrate/isopropylmalate dehydrogenase)
WBGene00007849	tbc-19	C31E10.8	28	35	2.17e-05	TGTACATA	C. elegans TBC-19 protein; contains similarity to Pfam domain PF00566 TBC domain contains similarity to Interpro domains IPR000195 (RabGAP/TBC), IPR002011 (Receptor tyrosine kinase, class II, conserved site)
WBGene00016313	set-4	C32D5.5	50	57	7.54e-05	TGTAAATA	C. elegans SET-4 protein; contains similarity to Pfam domain PF00856 SET domain contains similarity to Interpro domain IPR001214 (SET)
WBGene00016324	C32E8.6	C32E8.6a	8	15	4.79e-05	TGTATATA	contains similarity to Pfam domain PF00501 AMP-binding enzyme contains similarity to Interpro domain IPR000873 (AMP-dependent synthetase and ligase)
WBGene00007876	dct-19	C32H11.13	30	37	2.17e-05	TGTACATA	C. elegans DCT-19 protein; contains similarity to Pfam domain PF02408 CUB-like domain contains similarity to Interpro domain IPR003366 (CUB-like region)
WBGene00007890	C33A12.19	C33A12.19	109	116	7.54e-05	TGTAAATA	contains similarity to Onchocerca volvulus Major antigen.; SW:ANT1_ONCVO
WBGene00006444	shn-1	C33B4.3a	65	72	4.79e-05	TGTATATA	C. elegans SHN-1 protein; contains similarity to Pfam domains PF00023 (Ankyrin repeat) (6), PF00595 (PDZ domain (Also known as DHR or GLGF)) , PF00536 (SAM domain (Sterile alpha motif)) contains similarity to Interpro domains IPR002110 (Ankyrin), IPR013761 (Sterile alpha motif-type), IPR001660 (Sterile alpha motif SAM), IPR001478 (PDZ/DHR/GLGF)
			262	269	4.79e-05	TGTATATA
WBGene00016378	imp-3	C33H5.11.1	19	26	7.54e-05	TGTAAATA	C. elegans IMP-3 protein; contains similarity to Pfam domain PF04258 Signal peptide peptidase contains similarity to Interpro domain IPR007369 (Peptidase A22B, signal peptide peptidase)
WBGene00044325	tag-321	C33H5.19.1	17	24	7.54e-05	TGTAAATA	C. elegans TAG-321 protein ; contains similarity to Homo sapiens Transmembrane protein 65; ENSEMBL:ENSP00000297632
WBGene00002221	klp-10	C33H5.4a	418	425	7.54e-05	TGTAAATA	C. elegans KLP-10 protein; contains similarity to Pfam domain PF00225 Kinesin motor domain contains similarity to Interpro domain IPR001752 (Kinesin, motor region)
WBGene00016376	sec-10	C33H5.9	151	158	7.54e-05	TGTAAATA	C. elegans SEC-10 protein; contains similarity to Pfam domain PF07393 Exocyst complex component Sec10 contains similarity to Interpro domain IPR009976 (Exocyst complex component Sec10)
WBGene00016396	C34B2.11	C34B2.11	80	87	2.17e-05	TGTACATA	C34B2.11 is enriched in the amphid sensillum, the excretory cell, the hypodermis, and the nervous system based on tiling array and RNA-seq studies; is affected by several genes including daf-16, daf-2, and daf-12 based on microarray, tiling array, and RNA-seq studies; is affected by Lithium Chloride, stavudine, and Zidovudine based on microarray and RNA-seq studies.
WBGene00007918	sphk-1	C34C6.5b.1	45	52	9.83e-05	TGTACAAA	C. elegans SPHK-1 protein; contains similarity to Pfam domain PF00781 Diacylglycerol kinase catalytic domain (presumed) contains similarity to Interpro domain IPR001206 (Diacylglycerol kinase, catalytic region)
WBGene00016405	C34D4.14	C34D4.14	44	51	9.83e-05	TGTACAAA	contains similarity to Pfam domains PF06701 (Mib_herc2) , PF07738 (Sad1 / UNC-like C-terminal) , PF00023 (Ankyrin repeat) (2), PF02985 (HEAT repeat) , PF00632 (HECT-domain (ubiquitin-transferase)) contains similarity to Interpro domains IPR012919 (Sad1/UNC-like, C-terminal), IPR011989 (Armadillo-like helical), IPR000569 (HECT), IPR002110 (Ankyrin), IPR010606 (Mib-herc2)
WBGene00007945	C34F6.11	C34F6.11	58	65	7.54e-05	TGTAAATA	contains similarity to Neisseria meningitidis NADH dehydrogenase I, N subunit.; TR:Q9K1A8
WBGene00007941	C34F6.7	C34F6.7	75	82	4.79e-05	TGTATATA	contains similarity to Drosophila melanogaster Flybase gene name is CG14646-PA;; FLYBASE:CG14646
WBGene00006701	ubc-1	C35B1.1	241	248	4.79e-05	TGTATATA	C. elegans UBC-1 protein; contains similarity to Pfam domain PF00179 Ubiquitin-conjugating enzyme contains similarity to Interpro domains IPR000608 (Ubiquitin-conjugating enzyme, E2), IPR016135 (Ubiquitin-conjugating enzyme/RWD-like)
WBGene00007957	C35C5.8	C35C5.8a	141	148	2.17e-05	TGTACATA	C35C5.8 is enriched in dopaminergic neurons and the hypodermis based on tiling array studies; is affected by several genes including daf-16, daf-2, and skn-1 based on microarray and RNA-seq studies; is affected by fourteen chemicals including Rotenone, Tunicamycin, and Ethanol based on RNA-seq and microarray studies
WBGene00000204	arx-6	C35D10.16	96	103	7.54e-05	TGTAAATA	C. elegans ARX-6 protein; contains similarity to Pfam domain PF05856 ARP2/3 complex 20 kDa subunit (ARPC4) contains similarity to Interpro domain IPR008384 (ARP23 complex 20 kDa subunit)
WBGene00007965	C36A4.4	C36A4.4.1	221	228	7.54e-05	TGTAAATA	contains similarity to Pfam domain PF01704 UTP--glucose-1-phosphate uridylyltransferase contains similarity to Interpro domain IPR002618 (UTP--glucose-1-phosphate uridylyltransferase)
WBGene00003591	nex-4	C37H5.1	10	17	2.17e-05	TGTACATA	C. elegans NEX-4 protein; contains similarity to Pfam domain PF00191 Annexin contains similarity to Interpro domain IPR001464 (Annexin)
WBGene00002010	hsp-6	C37H5.8	242	249	7.54e-05	TGTAAATA	C. elegans HSP-6 protein; contains similarity to Pfam domain PF00012 Hsp70 protein contains similarity to Interpro domains IPR001023 (Heat shock protein Hsp70), IPR012725 (Chaperone DnaK), IPR013126 (Heat shock protein 70)
WBGene00007996	C38C6.3	C38C6.3	33	40	4.79e-05	TGTATATA	contains similarity to Schizosaccharomyces pombe Hypothetical transmembrane protein.; TR:O74525
WBGene00007999	tag-297	C38C6.6.1	77	84	4.79e-05	TGTATATA	C. elegans TAG-297 protein ;
WBGene00008006	tag-325	C38D4.5.1	161	168	7.54e-05	TGTAAATA	C. elegans TAG-325 protein; contains similarity to Pfam domains PF00620 (RhoGAP domain) , PF00169 (PH domain) , PF00397 (WW domain) contains similarity to Interpro domains IPR001849 (Pleckstrin-like), IPR011993 (Pleckstrin homology-type), IPR015767 (Rho GTPase activating), IPR001202 (WW/Rsp5/WWP), IPR000198 (RhoGAP)
WBGene00003912	pal-1	C38D4.6a.1	25	32	9.83e-05	TGTACAAA	C. elegans PAL-1 protein; contains similarity to Pfam domain PF00046 Homeobox domain contains similarity to Interpro domains IPR012287 (Homeodomain-related), IPR001356 (Homeobox)
			25	32	9.83e-05	TGTACAAA
			25	32	9.83e-05	TGTACAAA
WBGene00001007	dli-1	C39E9.14a.1	92	99	7.54e-05	TGTAAATA	C. elegans DLI-1 protein; contains similarity to Pfam domain PF05783 Dynein light intermediate chain (DLIC) contains similarity to Interpro domain IPR008467 (Dynein light intermediate chain)
			92	99	7.54e-05	TGTAAATA
WBGene00008032	C39E9.8	C39E9.8a	49	56	2.17e-05	TGTACATA	contains similarity to Brugia malayi Putative uncharacterized protein.; TR:A8PV57
			49	56	2.17e-05	TGTACATA
WBGene00006412	nlg-1	C40C9.5a	190	197	2.17e-05	TGTACATA	C. elegans NLG-1 protein; contains similarity to Pfam domain PF00135 Carboxylesterase contains similarity to Interpro domain IPR002018 (Carboxylesterase, type B)
			190	197	2.17e-05	TGTACATA
WBGene00008052	ctns-1	C41C4.7a	43	50	2.17e-05	TGTACATA	C. elegans CTNS-1 protein; contains similarity to Pfam domain PF04193 PQ loop repeat contains similarity to Interpro domains IPR005282 (Lysosomal cystine transporter), IPR006603 (Cystinosin/ERS1p repeat)
			182	189	2.17e-05	TGTACATA
WBGene00004218	ptr-3	C41D7.2	32	39	7.54e-05	TGTAAATA	C. elegans PTR-3 protein; contains similarity to Pfam domain PF02460 Patched family contains similarity to Interpro domains IPR003392 (Patched), IPR000731 (Sterol-sensing 5TM box)
WBGene00008061	C41G7.3	C41G7.3	108	115	7.54e-05	TGTAAATA	contains similarity to Pfam domain PF00013 KH domain contains similarity to Interpro domains IPR004087 (K Homology), IPR004088 (K Homology, type 1)
WBGene00016582	C42C1.4	C42C1.4a.1	5	12	7.54e-05	TGTAAATA	contains similarity to Interpro domain IPR015943 (WD40/YVTN repeat-like)
			5	12	7.54e-05	TGTAAATA
			219	226	7.54e-05	TGTAAATA
WBGene00016610	C43G2.1	C43G2.1.1	163	170	9.83e-05	TGTACAAA	contains similarity to Pfam domain PF03006 Haemolysin-III related contains similarity to Interpro domains IPR001610 (PAC motif), IPR004254 (Hly-III related proteins)
WBGene00016617	C43H6.4	C43H6.4	274	281	7.54e-05	TGTAAATA	C43H6.4 is enriched in the nervous system and the seam cell based on RNA-seq and microarray studies; is affected by several genes including sir-2.1, pgl-1, and sma-2 based on RNA-seq and microarray studies; is affected by five chemicals including 1-methylnicotinamide, Rotenone, and bisphenol S based on RNA-seq and microarray studies; is predicted to encode a protein with the following domain: Arm…
WBGene00016622	C43H8.2	C43H8.2	104	111	7.54e-05	TGTAAATA	contains similarity to Pfam domain PF09174 Maf1 regulator contains similarity to Interpro domains IPR017152 (RNA polymerase III transcriptional repressor, MAF1), IPR015257 (Maf1 regulator)
WBGene00004058	pmp-1	C44B7.8	51	58	7.54e-05	TGTAAATA	C. elegans PMP-1 protein; contains similarity to Pfam domains PF06472 (ABC transporter transmembrane region 2) , PF00005 (ABC transporter) contains similarity to Interpro domains IPR003439 (ABC transporter-like), IPR011527 (ABC transporter, transmembrane region, type 1), IPR010509 (ABC transporter, N-terminal), IPR003593 (AAA+ ATPase, core), IPR005283 (Peroxysomal long chain fatty acyl transporte…
WBGene00016642	C44C1.2	C44C1.2	65	72	7.54e-05	TGTAAATA	contains similarity to Interpro domain IPR013781 (Glycoside hydrolase, subgroup, catalytic core)
WBGene00008120	C46F11.5	C46F11.5a	100	107	7.54e-05	TGTAAATA	contains similarity to Brugia malayi Putative uncharacterized protein.; TR:A8P4S6
			100	107	7.54e-05	TGTAAATA
WBGene00000950	deg-1	C47C12.6.1	119	126	4.79e-05	TGTATATA	C. elegans DEG-1 protein; contains similarity to Pfam domain PF00858 Amiloride-sensitive sodium channel contains similarity to Interpro domains IPR001873 (Na+ channel, amiloride-sensitive), IPR004726 (Degenerin)
			119	126	4.79e-05	TGTATATA
WBGene00007028	trr-1	C47D12.1a	159	166	7.54e-05	TGTAAATA	C. elegans TRR-1 protein; contains similarity to Interpro domains IPR002048 (Calcium-binding EF-hand), IPR014009 (PIK-related kinase), IPR000403 (Phosphatidylinositol 3- and 4-kinase, catalytic), IPR003152 (PIK-related kinase, FATC)
			159	166	7.54e-05	TGTAAATA
WBGene00000964	dhp-2	C47E12.8	8	15	7.54e-05	TGTAAATA	C. elegans DHP-2 protein; contains similarity to Pfam domain PF01979 Amidohydrolase family contains similarity to Interpro domains IPR011778 (D-hydantoinase), IPR005847 (Dihydroorotase region), IPR006680 (Amidohydrolase 1)
WBGene00016746	C48B6.10	C48B6.10	2	9	9.83e-05	TGTACAAA	C48B6.10 is enriched in the C, the cephalic sheath cell, and the intestine based on tiling array and RNA-seq studies; is affected by several genes including daf-16, gld-1, and hsf-1 based on RNA-seq and microarray studies; is affected by Rotenone based on RNA-seq studies.
WBGene00016741	C48B6.3	C48B6.3.1	518	525	7.54e-05	TGTAAATA	contains similarity to Brugia malayi Putative uncharacterized protein.; TR:A8QED8
WBGene00004213	ptp-1	C48D5.2a	415	422	9.83e-05	TGTACAAA	C. elegans PTP-1 protein; contains similarity to Pfam domains PF09380 (FERM C-terminal PH-like domain) , PF00373 (FERM central domain) , PF09379 (FERM N-terminal domain) , PF00595 (PDZ domain (Also known as DHR or GLGF)) , PF08736 (FERM adjacent (FA)) , PF00102 (Protein-tyrosine phosphatase) contains similarity to Interpro domains IPR012151 (Protein-tyrosine phosphatase, non-receptor type-3, -4),…
WBGene00008213	C49F8.1	C49F8.1	28	35	4.79e-05	TGTATATA	contains similarity to Saccharomyces cerevisiae Actin-binding protein of the cortical actin cytoskeleton, important for activation of the Arp2/3 complex that plays a key role actin in cytoskeleton organization; SGD:YCR088W
WBGene00016783	C49G7.5	C49G7.5	46	53	9.83e-05	TGTACAAA	irg-2 is involved in defense response to Gram-negative bacterium and innate immune response.
WBGene00008219	C50B6.3	C50B6.3	31	38	4.79e-05	TGTATATA	contains similarity to Pfam domain PF02408 CUB-like domain contains similarity to Interpro domain IPR003366 (CUB-like region)
WBGene00008224	C50B8.1	C50B8.1	252	259	7.54e-05	TGTAAATA	contains similarity to Pfam domain PF00076 RNA recognition motif. (a.k.a. RRM, RBD, or RNP domain) contains similarity to Interpro domains IPR012677 (Nucleotide-binding, alpha-beta plait), IPR000504 (RNA recognition motif, RNP-1)
WBGene00016804	C50C3.12	C50C3.12	162	169	2.17e-05	TGTACATA	C50C3.12 is affected by rsr-2 and drh-3 based on tiling array and RNA-seq studies.
WBGene00016805	C50D2.1	C50D2.1	59	66	7.54e-05	TGTAAATA	C50D2.1 is enriched in the germline precursor cell and the hypodermis based on tiling array and RNA-seq studies; is affected by several genes including daf-16, skn-1, and daf-12 based on microarray, RNA-seq, and tiling array studies; is affected by twelve chemicals including Ethanol, methylmercury hydroxide, and 1-methylnicotinamide based on RNA-seq and microarray studies.
WBGene00016806	C50D2.2	C50D2.2	26	33	7.54e-05	TGTAAATA	contains similarity to Pfam domain PF00324 Amino acid permease contains similarity to Interpro domains IPR004841 (Amino acid permease-associated region), IPR002293 (Amino acid/polyamine transporter I)
WBGene00016810	C50D2.7	C50D2.7.1	244	251	7.54e-05	TGTAAATA	contains similarity to Pfam domain PF04587 ADP-specific Phosphofructokinase/Glucokinase conserved region contains similarity to Interpro domain IPR007666 (ADP-specific phosphofructokinase/glucokinase)
WBGene00008238	C50F4.16	C50F4.16.1	50	57	2.17e-05	TGTACATA	contains similarity to Pfam domain PF00293 NUDIX domain contains similarity to Interpro domain IPR000086 (NUDIX hydrolase, core)
WBGene00001911	his-37	C50F4.7	25	32	7.54e-05	TGTAAATA	C. elegans HIS-37 protein; contains similarity to Pfam domain PF00125 Core histone H2A/H2B/H3/H4 contains similarity to Interpro domains IPR009072 (Histone-fold), IPR007125 (Histone core), IPR001951 (Histone H4)
WBGene00008233	C50F4.8	C50F4.8	28	35	7.54e-05	TGTAAATA	C50F4.8 is involved in defense response to Gram-positive bacterium.
WBGene00016845	C50F7.5	C50F7.5	31	38	7.54e-05	TGTAAATA	C50F7.5 is expressed in several tissues, including the ABalapap, the ABalpaaa, the ABalpaapa, the ABalpaapp, and the DR muscle
WBGene00008246	C50H2.13	C50H2.13	14	21	2.17e-05	TGTACATA	contains similarity to Mus musculus Hypothetical protein.; TR:Q8CFT2
WBGene00001172	egl-3	C51E3.7b	2	9	9.83e-05	TGTACAAA	C. elegans EGL-3 protein; contains similarity to Pfam domains PF00082 (Subtilase family) , PF01483 (Proprotein convertase P-domain) contains similarity to Interpro domains IPR000209 (Peptidase S8 and S53, subtilisin, kexin, sedolisin), IPR015500 (Peptidase S8, subtilisin-related), IPR002884 (Proprotein convertase, P)
WBGene00016866	coel-1	C52B9.3b	346	353	2.17e-05	TGTACATA	C. elegans COEL-1 protein; contains similarity to Pfam domain PF00560 Leucine Rich Repeat
WBGene00016889	C52E12.4	C52E12.4	402	409	4.79e-05	TGTATATA	contains similarity to Pfam domains PF01477 (PLAT/LH2 domain) , PF02141 (DENN (AEX-3) domain) , PF03456 (uDENN domain) , PF03455 (dDENN domain) , PF02759 (RUN domain) contains similarity to Interpro domains IPR005112 (dDENN), IPR001024 (Lipoxygenase, LH2), IPR004012 (RUN), IPR005113 (uDENN), IPR001194 (DENN)
WBGene00016905	ztf-3	C53D5.4	150	157	7.54e-05	TGTAAATA	C. elegans ZTF-3 protein; contains similarity to Pfam domain PF00096 Zinc finger, C2H2 type contains similarity to Interpro domains IPR015880 (Zinc finger, C2H2-like), IPR013087 (Zinc finger, C2H2-type/integrase, DNA-binding), IPR007087 (Zinc finger, C2H2-type)
WBGene00004004	pgp-10	C54D1.1	54	61	7.54e-05	TGTAAATA	C. elegans PGP-10 protein; contains similarity to Pfam domains PF00664 (ABC transporter transmembrane region) (2), PF00005 (ABC transporter) (2)contains similarity to Interpro domains IPR003439 (ABC transporter-like), IPR011527 (ABC transporter, transmembrane region, type 1), IPR001140 (ABC transporter, transmembrane region), IPR003593 (AAA+ ATPase, core)
WBGene00001500	ftn-1	C54F6.14	24	31	2.17e-05	TGTACATA	C. elegans FTN-1 protein; contains similarity to Pfam domain PF00210 Ferritin-like domain contains similarity to Interpro domains IPR009040 (Ferritin-like), IPR012347 (Ferritin-related), IPR001519 (Ferritin, N-terminal), IPR008331 (Ferritin and Dps)
WBGene00016921	C54F6.3	C54F6.3	5	12	2.17e-05	TGTACATA	contains similarity to Pfam domain PF04590 Protein of unknown function, DUF595 contains similarity to Interpro domain IPR007669 (Protein of unknown function DUF595)
WBGene00008345	C56A3.6	C56A3.6.1	84	91	7.54e-05	TGTAAATA	contains similarity to Pfam domain PF00036 EF hand contains similarity to Interpro domains IPR011992 (EF-Hand type), IPR002048 (Calcium-binding EF-hand)
WBGene00016964	C56C10.7	C56C10.7a.1	32	39	7.54e-05	TGTAAATA	contains similarity to Pfam domain PF06159 Protein of unknown function (DUF974) contains similarity to Interpro domain IPR010378 (Protein of unknown function DUF974)
			32	39	7.54e-05	TGTAAATA
WBGene00016990	vps-37	CD4.4	59	66	7.54e-05	TGTAAATA	C. elegans VPS-37 protein; contains similarity to Pfam domain PF07200 Modifier of rudimentary (Mod(r)) protein contains similarity to Interpro domain IPR009851 (Modifier of rudimentary, Modr)
WBGene00017007	D1007.10	D1007.10b	16	23	4.79e-05	TGTATATA	D1007.10 is enriched in the AVE and the germ line based on tiling array and RNA-seq studies; is affected by several genes including daf-12, clk-1, and sir-2.1 based on tiling array, RNA-seq, and microarray studies; is affected by six chemicals including Rotenone, stavudine, and Zidovudine based on RNA-seq and microarray studies.
WBGene00001501	ftn-2	D1037.3.1	46	53	2.17e-05	TGTACATA	ftn-2 is an ortholog of human FTH1 (ferritin heavy chain 1), FTHL17 (ferritin heavy chain like 17), and FTMT (ferritin mitochondrial); exhibits identical protein binding activity; is involved in defense response to Gram-positive bacterium; is expressed in the body wall musculature, the hypodermis, the intestine, and the pharynx; human orthologs of this gene are implicated in hemochromatosis type …
			46	53	2.17e-05	TGTACATA
			46	53	2.17e-05	TGTACATA
			46	53	2.17e-05	TGTACATA
WBGene00017033	nekl-4	D1044.8	13	20	4.79e-05	TGTATATA	C. elegans NEKL-4 protein; contains similarity to Pfam domain PF00069 Protein kinase domain contains similarity to Interpro domains IPR017441 (Protein kinase ATP binding, conserved site), IPR011989 (Armadillo-like helical), IPR002290 (Serine/threonine protein kinase), IPR000225 (Armadillo), IPR008271 (Serine/threonine protein kinase, active site), IPR000719 (Protein kinase, core), IPR001245 (Tyro…
WBGene00008366	D1046.5	D1046.5	280	287	2.17e-05	TGTACATA	contains similarity to Homo sapiens Isoform 1 of Integral membrane protein GPR175; ENSEMBL:ENSP00000347748
WBGene00017039	trk-1	D1073.1a	46	53	4.79e-05	TGTATATA	C. elegans TRK-1 protein; contains similarity to Pfam domain PF07714 Protein tyrosine kinase contains similarity to Interpro domains IPR017441 (Protein kinase ATP binding, conserved site), IPR002290 (Serine/threonine protein kinase), IPR000719 (Protein kinase, core), IPR003006 (Immunoglobulin/major histocompatibility complex, conserved site), IPR001245 (Tyrosine protein kinase)
WBGene00044082	D1086.12	D1086.12a	107	114	4.79e-05	TGTATATA	D1086.12 is enriched in the body wall muscle cell based on tiling array studies; is affected by several genes including daf-16, daf-2, and daf-12 based on tiling array, microarray, and RNA-seq studies; is affected by Rotenone, Zidovudine, and Colistin based on RNA-seq and microarray studies.
			107	114	4.79e-05	TGTATATA
WBGene00008395	D1086.8	D1086.8	24	31	9.83e-05	TGTACAAA	contains similarity to Pfam domain PF01579 (Domain of unknown function DUF19)
WBGene00001134	eat-3	D2013.5	292	299	7.54e-05	TGTAAATA	C. elegans EAT-3 protein; contains similarity to Pfam domain PF00350 Dynamin family contains similarity to Interpro domain IPR001401 (Dynamin, GTPase region)
WBGene00044071	tag-233	D2021.2a	434	441	7.54e-05	TGTAAATA	C. elegans TAG-233 protein; contains similarity to Pfam domain PF01529 DHHC zinc finger domain contains similarity to Interpro domain IPR001594 (Zinc finger, DHHC-type)
WBGene00008411	D2030.1	D2030.1.1	39	46	7.54e-05	TGTAAATA	contains similarity to Pfam domain PF01532 Glycosyl hydrolase family 47 contains similarity to Interpro domain IPR001382 (Glycoside hydrolase, family 47)
			39	46	7.54e-05	TGTAAATA
WBGene00008412	D2030.2	D2030.2a.1	188	195	2.17e-05	TGTACATA	contains similarity to Pfam domain PF07724 ATPase family associated with various cellular activities (AAA) contains similarity to Interpro domains IPR013093 (ATPase AAA-2), IPR003593 (AAA+ ATPase, core), IPR004487 (ClpX, ATPase regulatory subunit)
WBGene00008413	D2030.3	D2030.3	88	95	2.17e-05	TGTACATA	contains similarity to Brugia malayi Putative uncharacterized protein.; TR:A8QGT2
WBGene00008419	wdr-23	D2030.9a	200	207	2.17e-05	TGTACATA	C. elegans WDR-23 protein; contains similarity to Pfam domain PF00400 WD domain, G-beta repeat contains similarity to Interpro domains IPR000209 (Peptidase S8 and S53, subtilisin, kexin, sedolisin), IPR017399 (WD repeat protein 23), IPR001680 (WD40 repeat), IPR015943 (WD40/YVTN repeat-like)
WBGene00008430	D2085.5	D2085.5b.1	54	61	2.17e-05	TGTACATA	contains similarity to Interpro domain IPR000192 (Aminotransferase, class V/Cysteine desulphurase)
			54	61	2.17e-05	TGTACATA
			54	61	2.17e-05	TGTACATA
WBGene00001522	gbh-1	D2089.5	36	43	7.54e-05	TGTAAATA	C. elegans GBH-1 protein; contains similarity to Pfam domain PF02668 Taurine catabolism dioxygenase TauD, TfdA family contains similarity to Interpro domains IPR012775 (Gamma-butyrobetaine,2-oxoglutarate dioxygenase), IPR003819 (Taurine catabolism dioxygenase TauD/TfdA)
WBGene00017073	D2096.6	D2096.6	80	87	7.54e-05	TGTAAATA	D2096.6 is involved in endoplasmic reticulum unfolded protein response; is expressed in the epithelial cell and the pharynx.
WBGene00003618	nhr-19	E02H1.7	76	83	7.54e-05	TGTAAATA	C. elegans NHR-19 protein; contains similarity to Pfam domains PF00104 (Ligand-binding domain of nuclear hormone receptor) , PF00105 (Zinc finger, C4 type (two domains)) contains similarity to Interpro domains IPR008946 (Nuclear hormone receptor, ligand-binding), IPR001723 (Steroid hormone receptor), IPR000324 (Vitamin D receptor), IPR013088 (Zinc finger, NHR/GATA-type), IPR001628 (Zinc finger, n…
WBGene00008495	F01D5.5	F01D5.5	25	32	7.54e-05	TGTAAATA	contains similarity to Pfam domain PF01549 ShK domain-like contains similarity to Interpro domain IPR003582 (Metridin-like ShK toxin)
WBGene00000115	alh-9	F01F1.6.1	17	24	7.54e-05	TGTAAATA	C. elegans ALH-9 protein; contains similarity to Pfam domain PF00171 Aldehyde dehydrogenase family contains similarity to Interpro domains IPR016163 (Aldehyde dehydrogenase, C-terminal), IPR016162 (Aldehyde dehydrogenase, N-terminal), IPR015590 (Aldehyde dehydrogenase), IPR016160 (Aldehyde dehydrogenase, conserved site)
WBGene00017218	dct-5	F07F6.5	53	60	7.54e-05	TGTAAATA	C. elegans DCT-5 protein ;
WBGene00006923	vhp-1	F08B1.1a.1	401	408	4.79e-05	TGTATATA	C. elegans VHP-1 protein; contains similarity to Pfam domain PF00782 Dual specificity phosphatase, catalytic domain contains similarity to Interpro domains IPR001763 (Rhodanese-like), IPR016130 (Protein-tyrosine phosphatase, active site), IPR000387 (Protein-tyrosine phosphatase), IPR000340 (Protein-tyrosine phosphatase, dual specificity), IPR008343 (MAP kinase phosphatase)
			177	184	4.79e-05	TGTATATA
WBGene00000083	adt-2	F08C6.1a.1	170	177	7.54e-05	TGTAAATA	C. elegans ADT-2 protein; contains similarity to Pfam domains PF00090 (Thrombospondin type 1 domain) (6), PF01421 (Reprolysin (M12B) family zinc metalloprotease) contains similarity to Interpro domains IPR000884 (Thrombospondin, type I), IPR006025 (Peptidase M, neutral zinc metallopeptidases, zinc-binding site), IPR001590 (Peptidase M12B, ADAM/reprolysin)
WBGene00017241	F08C6.2	F08C6.2a	154	161	7.54e-05	TGTAAATA	contains similarity to Pfam domain PF01467 Cytidylyltransferase contains similarity to Interpro domains IPR004821 (Cytidyltransferase-related), IPR014729 (Rossmann-like alpha/beta/alpha sandwich fold), IPR004820 (Cytidylyltransferase)
WBGene00017273	gosr-1	F08F8.8	247	254	7.54e-05	TGTAAATA	C. elegans GOSR-1 protein; contains similarity to Pfam domain PF05008 Vesicle transport v-SNARE protein contains similarity to Interpro domain IPR007705 (Vesicle transport v-SNARE)
WBGene00008610	F09C3.2	F09C3.2	69	76	7.54e-05	TGTAAATA	contains similarity to Pfam domain PF00702 haloacid dehalogenase-like hydrolase contains similarity to Interpro domain IPR005834 (Haloacid dehalogenase-like hydrolase)
WBGene00017301	F09F7.4	F09F7.4a.1	201	208	9.83e-05	TGTACAAA	contains similarity to Pfam domain PF00378 Enoyl-CoA hydratase/isomerase family contains similarity to Interpro domain IPR001753 (Crotonase, core)
WBGene00017309	F09F9.4	F09F9.4	341	348	4.79e-05	TGTATATA	contains similarity to Pfam domain PF00090 Thrombospondin type 1 domain contains similarity to Interpro domains IPR008085 (Thrombospondin, subtype 1), IPR000884 (Thrombospondin, type I)
WBGene00017310	F09G2.1	F09G2.1	92	99	4.79e-05	TGTATATA	contains similarity to Pfam domain PF07714 Protein tyrosine kinase contains similarity to Interpro domains IPR002290 (Serine/threonine protein kinase), IPR000719 (Protein kinase, core), IPR001245 (Tyrosine protein kinase), IPR008266 (Tyrosine protein kinase, active site)
WBGene00008646	F10C2.5	F10C2.5	79	86	4.79e-05	TGTATATA	contains similarity to Pfam domain PF01532 Glycosyl hydrolase family 47 contains similarity to Interpro domains IPR010916 (TonB box, conserved site), IPR001382 (Glycoside hydrolase, family 47)
WBGene00008648	F10D11.2	F10D11.2	9	16	4.79e-05	TGTATATA	contains similarity to Bacillus thuringiensis Pesticidial crystal protein cry8Ca (Insecticidal delta-endotoxinsCryVIIIC(a)) (Crystaline entomocidal protoxin) (130 kDa crystalsprotein).; SW:C8CA_BACTP
WBGene00017349	farl-11	F10E7.8	35	42	7.54e-05	TGTAAATA	C. elegans FARL-11 protein; contains similarity to Pfam domain PF07923 N1221-like protein contains similarity to Interpro domain IPR012486 (N1221-like)
WBGene00004737	scc-1	F10G7.4	171	178	7.54e-05	TGTAAATA	C. elegans SCC-1 protein; contains similarity to Pfam domains PF04824 (Conserved region of Rad21 / Rec8 like protein) , PF04825 (N terminus of Rad21 / Rec8 like protein) contains similarity to Interpro domains IPR006909 (Rad21/Rec8 like protein, C-terminal), IPR006910 (Rad21/Rec8 like protein, N-terminal)
WBGene00008691	F11C1.2	F11C1.2	220	227	7.54e-05	TGTAAATA	contains similarity to Lactococcus lactis Rgg protein, putative.; TR:O87251
WBGene00003891	osm-11	F11C7.5	17	24	7.54e-05	TGTAAATA	C. elegans OSM-11 protein ;
WBGene00000606	col-17	F11G11.10	86	93	7.54e-05	TGTAAATA	C. elegans COL-17 protein; contains similarity to Interpro domain IPR004829 (Cell surface antigen)
WBGene00001425	fis-2	F13B9.8a	47	54	4.79e-05	TGTATATA	C. elegans FIS-2 protein; contains similarity to Interpro domains IPR016543 (Tetratricopeptide repeat 11 Fission 1 protein), IPR011990 (Tetratricopeptide-like helical)
			47	54	4.79e-05	TGTATATA
WBGene00008760	F13E9.11	F13E9.11a	100	107	4.79e-05	TGTATATA	contains similarity to Brugia malayi Putative uncharacterized protein.; TR:A8NV51
WBGene00008774	F13H10.3	F13H10.3a	273	280	9.83e-05	TGTACAAA	contains similarity to Pfam domain PF01490 Transmembrane amino acid transporter protein contains similarity to Interpro domain IPR013057 (Amino acid transporter, transmembrane)
WBGene00044784	F13H10.8	F13H10.8	132	139	4.79e-05	TGTATATA	contains similarity to Homo sapiens hypothetical protein LOC171546; ENSEMBL:ENSP00000298130
WBGene00008802	F14E5.4	F14E5.4.1	26	33	7.54e-05	TGTAAATA	contains similarity to Pfam domain PF00328 Histidine acid phosphatase contains similarity to Interpro domain IPR000560 (Histidine acid phosphatase)
			26	33	7.54e-05	TGTAAATA
WBGene00001388	far-4	F15B9.2	30	37	2.17e-05	TGTACATA	C. elegans FAR-4 protein; contains similarity to Pfam domain PF05823 Nematode fatty acid retinoid binding protein (Gp-FAR-1) contains similarity to Interpro domain IPR008632 (Nematode fatty acid retinoid binding)
WBGene00000398	cdh-6	F15B9.7	39	46	9.83e-05	TGTACAAA	C. elegans CDH-6 protein; contains similarity to Pfam domains PF00008 (EGF-like domain) (2), PF02793 (Hormone receptor domain) , PF02210 (Laminin G domain) (2), PF00028 (Cadherin domain) (8), PF01825 (Latrophilin/CL-1-like GPS domain) contains similarity to Interpro domains IPR000742 (EGF-like, type 3), IPR013320 (Concanavalin A-like lectin/glucanase, subgroup), IPR001879 (GPCR, family 2, extrace…
WBGene00017484	F15E6.3	F15E6.3	65	72	7.54e-05	TGTAAATA	contains similarity to Cryptococcus neoformans Glycine-rich RNA binding protein, putative.; TR:Q5KDS6
WBGene00008925	F17H10.1	F17H10.1.1	16	23	2.17e-05	TGTACATA	contains similarity to Brugia malayi GH23377p, putative.; TR:A8PZN3
WBGene00017548	F18A1.7	F18A1.7.1	46	53	7.54e-05	TGTAAATA	F18A1.7 is expressed in the germ line; is predicted to encode a protein with the following domain: Chondroitin proteoglycan 4.
WBGene00017557	F18A12.8	F18A12.8a	181	188	2.17e-05	TGTACATA	contains similarity to Pfam domains PF05649 (Peptidase family M13) , PF01431 (Peptidase family M13) contains similarity to Interpro domains IPR006025 (Peptidase M, neutral zinc metallopeptidases, zinc-binding site), IPR000718 (Peptidase M13, neprilysin), IPR008753 (Peptidase M13)
			381	388	2.17e-05	TGTACATA
WBGene00008936	F18E2.1	F18E2.1	5	12	7.54e-05	TGTAAATA	contains similarity to Pfam domain PF00149 Calcineurin-like phosphoesterase contains similarity to Interpro domains IPR015914 (Purple acid phosphatase, N-terminal), IPR004843 (Metallophosphoesterase)
WBGene00017569	F18E9.3	F18E9.3	47	54	2.17e-05	TGTACATA	contains similarity to Drosophila melanogaster Flybase gene name is Sgs1-PA;; FLYBASE:CG3047
WBGene00008940	F18H3.4	F18H3.4	399	406	7.54e-05	TGTAAATA	contains similarity to Saccharomyces cerevisiae Essential protein involved in intracellular protein transport, coiled-coil protein necessary for transport from ER to Golgi; required for assembly of the ER-to-Golgi SNARE complex; SGD:YDL058W
WBGene00004317	rbg-1	F20D1.6	113	120	7.54e-05	TGTAAATA	rbg-1 is an ortholog of human RAB3GAP1; is predicted to have GTPase activator activity and Rab GTPase binding activity; is involved in amyloid fibril formation, autophagy, and positive regulation of autophagosome assembly; human orthologs of this gene are implicated in Warburg micro syndrome 1
WBGene00009012	F21D5.7	F21D5.7.1	263	270	7.54e-05	TGTAAATA	contains similarity to Pfam domains PF02978 (Signal peptide binding domain) , PF00448 (SRP54-type protein, GTPase domain) , PF02881 (SRP54-type protein, helical bundle domain) contains similarity to Interpro domains IPR004125 (Signal recognition particle, SRP54 subunit, M-domain), IPR000897 (Signal recognition particle, SRP54 subunit, GTPase), IPR013822 (Signal recognition particle, SRP54 subunit…
WBGene00017667	ttr-37	F21E9.3	37	44	4.79e-05	TGTATATA	C. elegans TTR-37 protein; contains similarity to Pfam domain PF01060 Transthyretin-like family contains similarity to Interpro domain IPR001534 (Transthyretin-like)
WBGene00004728	sax-2	F21H11.2a	17	24	7.54e-05	TGTAAATA	C. elegans SAX-2 protein ; contains similarity to Homo sapiens Isoform 1 of Protein furry homolog-like; ENSEMBL:ENSP00000264319
WBGene00017698	F22B7.9	F22B7.9	41	48	7.54e-05	TGTAAATA	contains similarity to Brugia malayi Putative uncharacterized protein.; TR:A8QGZ6
WBGene00009050	F22D6.2	F22D6.2.1	711	718	2.17e-05	TGTACATA	contains similarity to Pfam domains PF01428 (AN1-like Zinc finger) , PF01754 (A20-like zinc finger) contains similarity to Interpro domains IPR000058 (Zinc finger, AN1-type), IPR002653 (Zinc finger, A20-type)
WBGene00017724	F22F7.7	F22F7.7.1	511	518	7.54e-05	TGTAAATA	contains similarity to Pfam domain PF04752 ChaC-like protein contains similarity to Interpro domain IPR006840 (ChaC-like protein)
			511	518	7.54e-05	TGTAAATA
WBGene00009064	F22G12.4	F22G12.4	43	50	9.83e-05	TGTACAAA	contains similarity to Pfam domains PF01363 (FYVE zinc finger) , PF00023 (Ankyrin repeat) (18)contains similarity to Interpro domains IPR000306 (Zinc finger, FYVE-type), IPR013083 (Zinc finger, RING/FYVE/PHD-type), IPR002110 (Ankyrin), IPR017455 (Zinc finger, FYVE-related)
WBGene00017735	F23C8.6	F23C8.6	87	94	4.79e-05	TGTATATA	contains similarity to Pfam domain PF03357 Snf7 contains similarity to Interpro domain IPR005024 (Snf7)
WBGene00017747	F23F1.6	F23F1.6	27	34	4.79e-05	TGTATATA	contains similarity to Pfam domain PF00324 Amino acid permease contains similarity to Interpro domains IPR004755 (Cationic amino acid transport permease), IPR004841 (Amino acid permease-associated region), IPR002293 (Amino acid/polyamine transporter I)
WBGene00017777	F25B5.6	F25B5.6a	49	56	7.54e-05	TGTAAATA	contains similarity to Pfam domain PF02875 Mur ligase family, glutamate ligase domain contains similarity to Interpro domains IPR004101 (Mur ligase, C-terminal), IPR013221 (Mur ligase, central), IPR001645 (Folylpolyglutamate synthetase)
WBGene00000843	cup-2	F25D7.1.1	138	145	7.54e-05	TGTAAATA	C. elegans CUP-2 protein; contains similarity to Pfam domain PF04511 Der1-like family contains similarity to Interpro domain IPR007599 (Der1-like)
WBGene00017781	F25E2.3	F25E2.3	27	34	4.79e-05	TGTATATA	contains similarity to Pfam domain PF02551 Acyl-CoA thioesterase contains similarity to Interpro domain IPR003703 (Acyl-CoA thioesterase)
WBGene00017789	F25E5.8	F25E5.8a	32	39	7.54e-05	TGTAAATA	contains similarity to Plasmodium lophurae RecName: Full=Histidine-rich glycoprotein;sFlags: Precursor;; SW:P04929
			464	471	7.54e-05	TGTAAATA
WBGene00003816	nrs-2	F25G6.6	341	348	2.17e-05	TGTACATA	C. elegans NRS-2 protein; contains similarity to Pfam domains PF00310 (Glutamine amidotransferases class-II) , PF00733 (Asparagine synthase) contains similarity to Interpro domains IPR000583 (Glutamine amidotransferase, class-II), IPR001962 (Asparagine synthase), IPR006426 (Asparagine synthase, glutamine-hydrolyzing), IPR014729 (Rossmann-like alpha/beta/alpha sandwich fold)
WBGene00009116	F25H2.2	F25H2.2	137	144	7.54e-05	TGTAAATA	contains similarity to Pfam domains PF00595 (PDZ domain (Also known as DHR or GLGF)) , PF00787 (PX domain) contains similarity to Interpro domains IPR002048 (Calcium-binding EF-hand), IPR001683 (Phox-like), IPR001478 (PDZ/DHR/GLGF)
WBGene00006407	lim-9	F25H5.1f	451	458	4.79e-05	TGTATATA	C. elegans LIM-9 protein; contains similarity to Pfam domains PF06297 (PET Domain) , PF00412 (LIM domain) (6)contains similarity to Interpro domains IPR010442 (PET), IPR001781 (Zinc finger, LIM-type)
WBGene00001113	dur-1	F25H8.5a	86	93	9.83e-05	TGTACAAA	C. elegans DUR-1 protein ; contains similarity to Sagittula stellata E-37 Putative uncharacterized protein.; TR:A3K1K8
			228	235	9.83e-05	TGTACAAA
			86	93	9.83e-05	TGTACAAA
WBGene00001496	frm-10	F25H9.5.1	44	51	7.54e-05	TGTAAATA	C. elegans FRM-10 protein; contains similarity to Interpro domain IPR000299 (Band 4.1, N-terminal)
WBGene00009142	F26A3.4	F26A3.4.1	225	232	7.54e-05	TGTAAATA	contains similarity to Pfam domain PF00782 Dual specificity phosphatase, catalytic domain contains similarity to Interpro domains IPR016130 (Protein-tyrosine phosphatase, active site), IPR000387 (Protein-tyrosine phosphatase), IPR000340 (Protein-tyrosine phosphatase, dual specificity)
WBGene00017834	F26F12.3	F26F12.3c.1	14	21	7.54e-05	TGTAAATA	F26F12.3 is enriched in the intestine and the nervous system based on microarray, tiling array, and RNA-seq studies; is affected by several genes including daf-16, daf-2, and daf-12 based on microarray, tiling array, and RNA-seq studies; is affected by seventeen chemicals including Ethanol, 1-methylnicotinamide, and methylmercuric chloride based on RNA-seq and microarray studies.
			203	210	7.54e-05	TGTAAATA
WBGene00017835	F26F12.4	F26F12.4	59	66	4.79e-05	TGTATATA	contains similarity to Brugia malayi Putative uncharacterized protein.; TR:A8QET6
WBGene00003598	nhl-2	F26F4.7	333	340	7.54e-05	TGTAAATA	C. elegans NHL-2 protein; contains similarity to Pfam domains PF00643 (B-box zinc finger) (2), PF01436 (NHL repeat) (4)contains similarity to Interpro domains IPR001841 (Zinc finger, RING-type), IPR013083 (Zinc finger, RING/FYVE/PHD-type), IPR003649 (B-box, C-terminal), IPR011042 (Six-bladed beta-propeller, TolB-like), IPR000315 (Zinc finger, B-box), IPR001258 (NHL repeat)
WBGene00017841	F26G1.5	F26G1.5	91	98	7.54e-05	TGTAAATA	contains similarity to Pfam domain PF01682 DB module contains similarity to Interpro domain IPR002602 (Protein of unknown function DB)
WBGene00017868	F27E11.2	F27E11.2a.1	18	25	2.17e-05	TGTACATA	contains similarity to Pfam domains PF01773 (Na+ dependent nucleoside transporter N-terminus) , PF07670 (Nucleoside recognition) , PF07662 (Na+ dependent nucleoside transporter C-terminus) contains similarity to Interpro domains IPR008276 (Concentrative nucleoside transporter), IPR002668 (Na+ dependent nucleoside transporter), IPR011657 (Na+ dependent nucleoside transporter, C-terminal), IPR01164…
WBGene00000478	cfz-2	F27E11.3a	303	310	2.17e-05	TGTACATA	C. elegans CFZ-2 protein; contains similarity to Pfam domains PF01534 (Frizzled/Smoothened family membrane region) , PF01392 (Fz domain) contains similarity to Interpro domains IPR000539 (Frizzled protein), IPR000024 (Frizzled cysteine-rich domain), IPR000832 (GPCR, family 2, secretin-like), IPR013032 (EGF-like region, conserved site), IPR015526 (Frizzled related)
WBGene00044035	F27E5.7	F27E5.7	36	43	4.79e-05	TGTATATA	F27E5.7 is enriched in the AFD, the NSM, and the hypodermis based on tiling array and RNA-seq studies; is affected by several genes including daf-2, clk-1, and elt-2 based on RNA-seq, microarray, and tiling array studies; is affected by six chemicals including Rotenone, D-glucose, and stavudine based on RNA-seq and microarray studies.
WBGene00017889	F28B3.10	F28B3.10.1	17	24	7.54e-05	TGTAAATA	contains similarity to Pfam domain PF08560 Protein of unknown function (DUF1757) contains similarity to Interpro domain IPR013869 (Protein of unknown function DUF1757)
			17	24	7.54e-05	TGTAAATA
WBGene00000779	cpn-3	F28H1.2.1	114	121	9.83e-05	TGTACAAA	C. elegans CPN-3 protein; contains similarity to Pfam domain PF00307 Calponin homology (CH) domain contains similarity to Interpro domains IPR016146 (Calponin-homology), IPR001715 (Calponin-like actin-binding), IPR003096 (SM22/calponin), IPR003247 (Calponin-like actin-binding subtype)
			114	121	9.83e-05	TGTACAAA
WBGene00017921	F29B9.5	F29B9.5	4	11	4.79e-05	TGTATATA	contains similarity to Pfam domain PF00085 Thioredoxin contains similarity to Interpro domains IPR011594 (Thioredoxin-like), IPR012335 (Thioredoxin fold), IPR013766 (Thioredoxin domain)
WBGene00017929	F29C4.7	F29C4.7a	19	26	7.54e-05	TGTAAATA	contains similarity to Pfam domains PF07744 (SPOC domain) , PF00076 (RNA recognition motif. (a.k.a. RRM, RBD, or RNP domain)) (2)contains similarity to Interpro domains IPR012921 (Spen paralogue and orthologue C-terminal), IPR012677 (Nucleotide-binding, alpha-beta plait), IPR010912 (Spen paralogue and orthologue C-terminal, metazoa), IPR000504 (RNA recognition motif, RNP-1)
			318	325	7.54e-05	TGTAAATA
WBGene00000980	dhs-17	F29G9.6a	14	21	9.83e-05	TGTACAAA	C. elegans DHS-17 protein; contains similarity to Pfam domain PF00106 short chain dehydrogenase contains similarity to Interpro domains IPR002347 (Glucose/ribitol dehydrogenase), IPR002198 (Short-chain dehydrogenase/reductase SDR), IPR016040 (NAD(P)-binding)
WBGene00009272	F30F8.3	F30F8.3	97	104	2.17e-05	TGTACATA	contains similarity to Pfam domain PF00595 PDZ domain (Also known as DHR or GLGF) contains similarity to Interpro domain IPR001478 (PDZ/DHR/GLGF)
WBGene00017947	F31D5.4	F31D5.4	16	23	4.79e-05	TGTATATA	contains similarity to Pfam domain PF01825 Latrophilin/CL-1-like GPS domain contains similarity to Interpro domain IPR000203 (GPS)
WBGene00017951	F31E3.4	F31E3.4	268	275	7.54e-05	TGTAAATA	contains similarity to Pfam domain PF00929 Exonuclease contains similarity to Interpro domains IPR013520 (Exonuclease, RNase T and DNA polymerase III), IPR006055 (Exonuclease), IPR015943 (WD40/YVTN repeat-like)
WBGene00004921	snt-1	F31E8.2a	129	136	2.17e-05	TGTACATA	C. elegans SNT-1 protein; contains similarity to Pfam domain PF00168 C2 domain contains similarity to Interpro domains IPR001565 (Synaptotagmin), IPR000008 (C2 calcium-dependent membrane targeting)
WBGene00017969	F32A5.3	F32A5.3	75	82	2.17e-05	TGTACATA	contains similarity to Pfam domain PF00450 Serine carboxypeptidase contains similarity to Interpro domain IPR001563 (Peptidase S10, serine carboxypeptidase)
WBGene00017974	vps-41	F32A6.3b	426	433	7.54e-05	TGTAAATA	C. elegans VPS-41 protein; contains similarity to Pfam domain PF00637 Region in Clathrin and VPS contains similarity to Interpro domain IPR000547 (Clathrin, heavy chain/VPS, 7-fold repeat)
WBGene00017979	F32B5.6	F32B5.6a	251	258	2.17e-05	TGTACATA	F32B5.6 is enriched in the OLL, the PVD, the coelomocyte, and the intestine based on microarray, tiling array, and RNA-seq studies; is affected by several genes including daf-16, daf-2, and glp-1 based on proteomic, microarray, tiling array, and RNA-seq studies; is affected by eight chemicals including Lithium Chloride, Cry5B, and stavudine based on microarray and RNA-seq studies.
			542	549	2.17e-05	TGTACATA
WBGene00003603	nhr-4	F32B6.1.1	154	161	4.79e-05	TGTATATA	C. elegans NHR-4 protein; contains similarity to Pfam domains PF00104 (Ligand-binding domain of nuclear hormone receptor) , PF00105 (Zinc finger, C4 type (two domains)) contains similarity to Interpro domains IPR008946 (Nuclear hormone receptor, ligand-binding), IPR001723 (Steroid hormone receptor), IPR000324 (Vitamin D receptor), IPR013088 (Zinc finger, NHR/GATA-type), IPR001628 (Zinc finger, nu…
			154	161	4.79e-05	TGTATATA
WBGene00017986	F32D1.7	F32D1.7	95	102	4.79e-05	TGTATATA	contains similarity to Homo sapiens Putative protein TPRXL; ENSEMBL:ENSP00000322097
WBGene00017992	F32E10.5	F32E10.5	8	15	7.54e-05	TGTAAATA	contains similarity to Pfam domain PF00567 Tudor domain contains similarity to Interpro domains IPR008191 (Maternal tudor protein), IPR002011 (Receptor tyrosine kinase, class II, conserved site), IPR002999 (Tudor)
WBGene00017996	F33D4.4	F33D4.4.1	45	52	9.83e-05	TGTACAAA	contains similarity to Pfam domains PF00487 (Fatty acid desaturase) , PF08557 (Sphingolipid Delta4-desaturase (DES)) contains similarity to Interpro domains IPR013866 (Sphingolipid delta4-desaturase, N-terminal), IPR006025 (Peptidase M, neutral zinc metallopeptidases, zinc-binding site), IPR010257 (Fatty acid desaturase, type 1, N-terminal), IPR011388 (Sphingolipid delta4-desaturase), IPR005804 (…
WBGene00044666	F33G12.7	F33G12.7	50	57	2.17e-05	TGTACATA	F33G12.7 is enriched in the AFD, the ASER, and the germ line based on RNA-seq studies; is affected by several genes including daf-2, let-7, and gld-1 based on RNA-seq, proteomic, and microarray studies; is affected by Rotenone and stavudine based on RNA-seq studies.
WBGene00000983	dhs-20	F35B12.2	44	51	4.79e-05	TGTATATA	C. elegans DHS-20 protein; contains similarity to Pfam domain PF00106 short chain dehydrogenase contains similarity to Interpro domains IPR002347 (Glucose/ribitol dehydrogenase), IPR002198 (Short-chain dehydrogenase/reductase SDR), IPR016040 (NAD(P)-binding)
WBGene00009383	F35B12.3	F35B12.3	44	51	9.83e-05	TGTACAAA	contains similarity to Interpro domain IPR000583 (Glutamine amidotransferase, class-II)
WBGene00009387	glb-15	F35B12.8	81	88	2.17e-05	TGTACATA	C. elegans GLB-15 protein; contains similarity to Interpro domain IPR012292 (Globin)
WBGene00003569	ncx-4	F35C12.2a	163	170	4.79e-05	TGTATATA	C. elegans NCX-4 protein; contains similarity to Pfam domain PF01699 Sodium/calcium exchanger protein contains similarity to Interpro domains IPR004481 (K+-dependent Na+/Ca+ exchanger related-protein), IPR004837 (Sodium/calcium exchanger membrane region)
WBGene00003569	ncx-4	F35C12.2b	163	170	4.79e-05	TGTATATA	C. elegans NCX-4 protein; contains similarity to Pfam domain PF01699 Sodium/calcium exchanger protein contains similarity to Interpro domains IPR004481 (K+-dependent Na+/Ca+ exchanger related-protein), IPR004837 (Sodium/calcium exchanger membrane region)
WBGene00018041	F35D2.3	F35D2.3	143	150	2.17e-05	TGTACATA	contains similarity to Interpro domains IPR000742 (EGF-like, type 3), IPR002049 (EGF-like, laminin), IPR013032 (EGF-like region, conserved site)
WBGene00004762	sel-5	F35G12.3b	273	280	2.17e-05	TGTACATA	C. elegans SEL-5 protein; contains similarity to Pfam domain PF00069 Protein kinase domain contains similarity to Interpro domains IPR002290 (Serine/threonine protein kinase), IPR008271 (Serine/threonine protein kinase, active site), IPR000719 (Protein kinase, core), IPR001245 (Tyrosine protein kinase), IPR017442 (Serine/threonine protein kinase-related)
WBGene00009435	F35G2.1	F35G2.1a.1	42	49	7.54e-05	TGTAAATA	contains similarity to Pfam domains PF04777 (Erv1 / Alr family) , PF00085 (Thioredoxin) contains similarity to Interpro domains IPR012335 (Thioredoxin fold), IPR006863 (Erv1/Alr), IPR013766 (Thioredoxin domain), IPR006662 (Thioredoxin-related)
			701	708	9.83e-05	TGTACAAA
WBGene00018073	F35H10.10	F35H10.10	1	8	2.17e-05	TGTACATA	contains similarity to Pfam domain PF00003 7 transmembrane receptor (metabotropic glutamate family) contains similarity to Interpro domain IPR000337 (GPCR, family 3)
WBGene00018072	nprl-3	F35H10.7.1	42	49	9.83e-05	TGTACAAA	nprl-3 is an ortholog of human NPRL3 (NPR3 like, GATOR1 complex subunit); is predicted to encode a protein with the following domain: Nitrogen permease regulator 3
			42	49	9.83e-05	TGTACAAA
WBGene00018078	F35H12.6	F35H12.6	249	256	9.83e-05	TGTACAAA	F35H12.6 is enriched in the nervous system and the ventral nerve cord based on tiling array, RNA-seq, and microarray studies; is affected by several genes including clk-1, pgl-1, and prg-1 based on microarray and RNA-seq studies.
WBGene00009456	F36A2.9	F36A2.9a	172	179	7.54e-05	TGTAAATA	contains similarity to Pfam domain PF00657 GDSL-like Lipase/Acylhydrolase contains similarity to Interpro domain IPR001087 (Lipase, GDSL)
			150	157	7.54e-05	TGTAAATA
			172	179	7.54e-05	TGTAAATA
WBGene00005654	srr-3	F36D3.3	18	25	7.54e-05	TGTAAATA	C. elegans SRR-3 protein; contains similarity to Pfam domain PF03268 Caenorhabditis protein of unknown function, DUF267 contains similarity to Interpro domain IPR004950 (Protein of unknown function DUF267, Caenorhabditis species)
WBGene00009482	F36G3.1	F36G3.1	37	44	4.79e-05	TGTATATA	F36G3.1 is enriched in the FLP and the hypodermis based on tiling array and microarray studies; is affected by several genes including daf-16, daf-2, and dpy-10 based on microarray and RNA-seq studies; is affected by six chemicals including levamisole, Chlorpyrifos, and Diazinon based on microarray studies
WBGene00001426	fkb-1	F36H1.1.1	350	357	7.54e-05	TGTAAATA	C. elegans FKB-1 protein; contains similarity to Pfam domain PF00254 FKBP-type peptidyl-prolyl cis-trans isomerase contains similarity to Interpro domain IPR001179 (Peptidyl-prolyl cis-trans isomerase, FKBP-type)
WBGene00044404	F36H2.5	F36H2.5	10	17	9.83e-05	TGTACAAA	contains similarity to Pfam domain PF00084 Sushi domain (SCR repeat) contains similarity to Interpro domains IPR000436 (Sushi/SCR/CCP), IPR016060 (Complement control module)
WBGene00018150	eip-24	F37C12.2	168	175	2.17e-05	TGTACATA	C. elegans EIP-24 protein; contains similarity to Pfam domain PF07264 Etoposide-induced protein 2.4 (EI24) contains similarity to Interpro domain IPR009890 (Etoposide-induced 2.4)
WBGene00004013	pha-4	F38A6.1a	159	166	7.54e-05	TGTAAATA	C. elegans PHA-4 protein; contains similarity to Pfam domain PF00250 Fork head domain contains similarity to Interpro domains IPR011991 (Winged helix repressor DNA-binding), IPR001766 (Fork head transcription factor)
WBGene00009528	F38A6.4	F38A6.4	36	43	7.54e-05	TGTAAATA	contains similarity to Mus musculus Single-stranded DNA-binding protein 3 (Sequence-specific single-sstranded-DNA-binding protein) (Lck-associated signal transducer).; SW:SSB3_MOUSE
WBGene00009552	F39B1.1	F39B1.1	60	67	4.79e-05	TGTATATA	contains similarity to Pfam domains PF00454 (Phosphatidylinositol 3- and 4-kinase) , PF00168 (C2 domain) , PF00787 (PX domain) , PF02809 (Ubiquitin interaction motif) , PF00613 (Phosphoinositide 3-kinase family, accessory domain (PIK domain)) , PF00792 (Phosphoinositide 3-kinase C2) contains similarity to Interpro domains IPR001263 (Phosphoinositide 3-kinase accessory region PIK), IPR002420 (Phos…
WBGene00006640	tsp-14	F39C12.3b	404	411	7.54e-05	TGTAAATA	C. elegans TSP-14 protein; contains similarity to Pfam domain PF00335 Tetraspanin family contains similarity to Interpro domain IPR000301 (CD9/CD37/CD63 antigen)
WBGene00018216	F40A3.1	F40A3.1	166	173	7.54e-05	TGTAAATA	F40A3.1 is involved in innate immune response.
WBGene00004096	pqm-1	F40F8.7.1	30	37	2.17e-05	TGTACATA	C. elegans PQM-1 protein; contains similarity to Interpro domain IPR007087 (Zinc finger, C2H2-type)
			51	58	4.79e-05	TGTATATA
			30	37	2.17e-05	TGTACATA
			51	58	4.79e-05	TGTATATA
WBGene00006470	tag-120	F40F9.2	35	42	7.54e-05	TGTAAATA	C. elegans TAG-120 protein; contains similarity to Pfam domain PF01027 Uncharacterised protein family UPF0005 contains similarity to Interpro domain IPR006214 (Protein of unknown function UPF0005)
WBGene00001440	fkh-8	F40H3.4	60	67	9.83e-05	TGTACAAA	C. elegans FKH-8 protein; contains similarity to Pfam domain PF00250 Fork head domain contains similarity to Interpro domains IPR011991 (Winged helix repressor DNA-binding), IPR001766 (Fork head transcription factor)
WBGene00018262	cyp-33C3	F41B5.4	63	70	9.83e-05	TGTACAAA	C. elegans CYP-33C3 protein; contains similarity to Pfam domain PF00067 Cytochrome P450 contains similarity to Interpro domains IPR001128 (Cytochrome P450), IPR002401 (Cytochrome P450, E-class, group I), IPR002403 (Cytochrome P450, E-class, group IV), IPR002397 (Cytochrome P450, B-class)
WBGene00018269	acs-11	F41C3.3.1	61	68	7.54e-05	TGTAAATA	C. elegans ACS-11 protein; contains similarity to Pfam domain PF00501 AMP-binding enzyme contains similarity to Interpro domain IPR000873 (AMP-dependent synthetase and ligase)
WBGene00018293	F41E6.12	F41E6.12	14	21	7.54e-05	TGTAAATA	F41E6.12 is enriched in the OLL, the PVD, the germline precursor cell, and the hypodermis based on microarray and tiling array studies; is affected by several genes including daf-2, daf-12, and dpy-10 based on microarray, tiling array, and RNA-seq studies; is affected by ten chemicals including Rotenone, Tunicamycin, and D-glucopyranose based on RNA-seq and microarray studies.
WBGene00018298	nlp-50	F41G3.1.1	116	123	4.79e-05	TGTATATA	nlp-50 is enriched in the nervous system and the sensillum based on microarray and RNA-seq studies; is affected by several genes including daf-2, clk-1, and elt-2 based on microarray, RNA-seq, and tiling array studies; is affected by five chemicals including Rotenone, D-glucose, and Atrazine based on RNA-seq and microarray studies.
			116	123	4.79e-05	TGTATATA
WBGene00044221	F41G3.18	F41G3.18	30	37	2.17e-05	TGTACATA	F41G3.18 is enriched in the intestine based on RNA-seq studies; is affected by several genes including elt-2, eat-2, and mir-34 based on RNA-seq and microarray studies
WBGene00018315	F41H10.2	F41H10.2	141	148	4.79e-05	TGTATATA	F41H10.2 is enriched in the male and the muscle cell based on RNA-seq and microarray studies; is affected by several genes including daf-16, glp-1, and skn-1 based on microarray and RNA-seq studies; is affected by six chemicals including Rotenone, manganese chloride, and D-glucose based on RNA-seq and microarray studies
WBGene00003593	nfm-1	F42A10.2a	199	206	7.54e-05	TGTAAATA	C. elegans NFM-1 protein; contains similarity to Pfam domains PF09380 (FERM C-terminal PH-like domain) , PF00373 (FERM central domain) , PF09379 (FERM N-terminal domain) , PF00769 (Ezrin/radixin/moesin family) contains similarity to Interpro domains IPR000798 (Ezrin/radixin/moesin ERM), IPR011993 (Pleckstrin homology-type), IPR014352 (FERM/acyl-CoA-binding protein, 3-helical bundle), IPR011174 (E…
WBGene00018343	F42A10.7	F42A10.7.1	86	93	2.17e-05	TGTACATA	contains similarity to Brugia malayi Putative uncharacterized protein.; TR:A8PDV2
WBGene00001713	grl-4	F42C5.7	88	95	4.79e-05	TGTATATA	C. elegans GRL-4 protein; contains similarity to Pfam domain PF04155 Ground-like domain contains similarity to Interpro domains IPR006655 (Molybdopterin oxidoreductase, prokaryotic, conserved site), IPR000480 (Glutelin), IPR003882 (Pistil-specific extensin-like protein), IPR007284 (Ground-like region)
WBGene00004057	pmk-3	F42G8.4.1	21	28	4.79e-05	TGTATATA	C. elegans PMK-3 protein; contains similarity to Pfam domain PF00069 Protein kinase domain contains similarity to Interpro domains IPR017441 (Protein kinase ATP binding, conserved site), IPR002290 (Serine/threonine protein kinase), IPR003527 (MAP kinase, conserved site), IPR000719 (Protein kinase, core), IPR001245 (Tyrosine protein kinase), IPR017442 (Serine/threonine protein kinase-related)
WBGene00000117	alh-11	F42G9.5a	13	20	9.83e-05	TGTACAAA	C. elegans ALH-11 protein; contains similarity to Pfam domain PF00171 Aldehyde dehydrogenase family contains similarity to Interpro domains IPR016163 (Aldehyde dehydrogenase, C-terminal), IPR016162 (Aldehyde dehydrogenase, N-terminal), IPR015590 (Aldehyde dehydrogenase), IPR016160 (Aldehyde dehydrogenase, conserved site)
WBGene00004922	snt-2	F42G9.7	580	587	4.79e-05	TGTATATA	C. elegans SNT-2 protein; contains similarity to Pfam domain PF00168 C2 domain contains similarity to Interpro domains IPR001565 (Synaptotagmin), IPR000008 (C2 calcium-dependent membrane targeting)
WBGene00018400	F43H9.4	F43H9.4	44	51	7.54e-05	TGTAAATA	F43H9.4 is an ortholog of human GLYATL3, GLYATL1P3, and GLYATL2; is predicted to have glycine N-acyltransferase activity.
WBGene00018405	F44A2.5	F44A2.5b	39	46	4.79e-05	TGTATATA	contains similarity to Interpro domain IPR003890 (MIF4G-like, type 3)
WBGene00000784	cpr-4	F44C4.3	36	43	4.79e-05	TGTATATA	C. elegans CPR-4 protein; contains similarity to Pfam domain PF00112 Papain family cysteine protease contains similarity to Interpro domains IPR013128 (Peptidase C1A, papain), IPR000169 (Peptidase, cysteine peptidase active site), IPR000668 (Peptidase C1A, papain C-terminal)
WBGene00018423	F44E2.10	F44E2.10	97	104	7.54e-05	TGTAAATA	contains similarity to Homo sapiens Uncharacterized protein KIAA0152; ENSEMBL:ENSP00000228506
WBGene00018427	F44E7.5	F44E7.5b	465	472	4.79e-05	TGTATATA	F44E7.5 is enriched in the germ line based on tiling array and RNA-seq studies; is affected by several genes including daf-2, dpy-10, and hsf-1 based on proteomic, RNA-seq, microarray, and tiling array studies; is affected by fifteen chemicals including manganese chloride, sodium arsenite, and D-glucose based on RNA-seq and microarray studies.
WBGene00005038	sra-12	F44F4.7	906	913	9.83e-05	TGTACAAA	C. elegans SRA-12 protein; contains similarity to Pfam domain PF02117 C.elegans Sra family integral membrane protein contains similarity to Interpro domain IPR000344 (Nematode chemoreceptor, Sra)
WBGene00009722	F45D3.2	F45D3.2	641	648	9.83e-05	TGTACAAA	contains similarity to Dictyocaulus viviparus Putative uncharacterized protein.; TR:Q6E6T3
WBGene00009723	F45D3.3	F45D3.3	31	38	4.79e-05	TGTATATA	contains similarity to Brugia malayi Putative uncharacterized protein.; TR:A8QDY4
			222	229	4.79e-05	TGTATATA
WBGene00009724	F45D3.4	F45D3.4a	144	151	4.79e-05	TGTATATA	contains similarity to Brugia malayi Putative uncharacterized protein.; TR:A8QDY4
			189	196	7.54e-05	TGTAAATA
WBGene00009724	F45D3.4	F45D3.4b	144	151	4.79e-05	TGTATATA	contains similarity to Brugia malayi Putative uncharacterized protein.; TR:A8QDY4
WBGene00009729	F45E10.2	F45E10.2a	67	74	7.54e-05	TGTAAATA	contains similarity to Pfam domain PF07690 Major Facilitator Superfamily contains similarity to Interpro domains IPR007114 (Major facilitator superfamily), IPR011701 (Major facilitator superfamily MFS-1), IPR005829 (Sugar transporter, conserved site)
WBGene00018470	F45E4.5	F45E4.5	68	75	4.79e-05	TGTATATA	F45E4.5 is enriched in the Z1, the Z4, and the hypodermis based on tiling array and RNA-seq studies; is affected by several genes including daf-16, daf-2, and skn-1 based on microarray, tiling array, and RNA-seq studies; is affected by nine chemicals including Neurotoxins, stavudine, and Zidovudine based on microarray and RNA-seq studies.
WBGene00003520	nas-1	F45G2.1	79	86	2.17e-05	TGTACATA	C. elegans NAS-1 protein; contains similarity to Pfam domain PF01400 Astacin (Peptidase family M12A) contains similarity to Interpro domains IPR006025 (Peptidase M, neutral zinc metallopeptidases, zinc-binding site), IPR001506 (Peptidase M12A, astacin), IPR006026 (Peptidase, metallopeptidases)
WBGene00004183	prk-2	F45H7.4.1	51	58	9.83e-05	TGTACAAA	C. elegans PRK-2 protein; contains similarity to Pfam domain PF00069 Protein kinase domain contains similarity to Interpro domains IPR017441 (Protein kinase ATP binding, conserved site), IPR002290 (Serine/threonine protein kinase), IPR008271 (Serine/threonine protein kinase, active site), IPR000719 (Protein kinase, core), IPR001245 (Tyrosine protein kinase), IPR017442 (Serine/threonine protein ki…
WBGene00003172	mec-8	F46A9.6.1	363	370	7.54e-05	TGTAAATA	C. elegans MEC-8 protein; contains similarity to Pfam domain PF00076 RNA recognition motif. (a.k.a. RRM, RBD, or RNP domain) contains similarity to Interpro domains IPR012677 (Nucleotide-binding, alpha-beta plait), IPR000504 (RNA recognition motif, RNP-1)
WBGene00003172	mec-8	F46A9.6.2	363	370	7.54e-05	TGTAAATA	C. elegans MEC-8 protein; contains similarity to Pfam domain PF00076 RNA recognition motif. (a.k.a. RRM, RBD, or RNP domain) contains similarity to Interpro domains IPR012677 (Nucleotide-binding, alpha-beta plait), IPR000504 (RNA recognition motif, RNP-1)
WBGene00003970	pek-1	F46C3.1	14	21	7.54e-05	TGTAAATA	C. elegans PEK-1 protein; contains similarity to Pfam domains PF00069 (Protein kinase domain) , PF01011 (PQQ enzyme repeat) contains similarity to Interpro domains IPR017441 (Protein kinase ATP binding, conserved site), IPR002290 (Serine/threonine protein kinase), IPR002372 (Pyrrolo-quinoline quinone), IPR008271 (Serine/threonine protein kinase, active site), IPR000719 (Protein kinase, core), IPR…
WBGene00000473	cey-2	F46F11.2.1	36	43	2.17e-05	TGTACATA	C. elegans CEY-2 protein; contains similarity to Pfam domain PF00313 'Cold-shock' DNA-binding domain contains similarity to Interpro domains IPR012340 (Nucleic acid-binding, OB-fold), IPR011129 (Cold shock protein), IPR002059 (Cold-shock protein, DNA-binding)
WBGene00018509	F46F11.6	F46F11.6	235	242	7.54e-05	TGTAAATA	contains similarity to Pfam domain PF00646 F-box domain contains similarity to Interpro domain IPR001810 (Cyclin-like F-box)
WBGene00009797	F46G10.2	F46G10.2	22	29	9.83e-05	TGTACAAA	contains similarity to Interpro domain IPR008957 (Fibronectin, type III-like fold)
			248	255	9.83e-05	TGTACAAA
WBGene00018516	tag-257	F46G11.3	205	212	7.54e-05	TGTAAATA	C. elegans TAG-257 protein; contains similarity to Pfam domain PF00069 Protein kinase domain contains similarity to Interpro domains IPR002290 (Serine/threonine protein kinase), IPR000719 (Protein kinase, core), IPR001245 (Tyrosine protein kinase), IPR017442 (Serine/threonine protein kinase-related)
WBGene00018522	F46H5.7	F46H5.7c.2	307	314	4.79e-05	TGTATATA	F46H5.7 is enriched in the germ line, the intestine, and the muscle cell based on proteomic and RNA-seq studies; is affected by several genes including daf-16, daf-2, and glp-1 based on microarray, tiling array, RNA-seq, and proteomic studies; is affected by seven chemicals including Cry5B, stavudine, and Cadmium based on RNA-seq and microarray studies; is predicted to encode a protein with the f…
WBGene00009801	F47A4.5	F47A4.5	51	58	9.83e-05	TGTACAAA	contains similarity to Pfam domains PF01734 (Patatin-like phospholipase) , PF00023 (Ankyrin repeat) (5)contains similarity to Interpro domains IPR001638 (Bacterial extracellular solute-binding protein, family 3), IPR002641 (Patatin), IPR002110 (Ankyrin), IPR001680 (WD40 repeat)
WBGene00018538	F47B7.7	F47B7.7	109	116	9.83e-05	TGTACAAA	contains similarity to Ostertagia ostertagi Putative ES protein (Fragment).; TR:Q8WQ03
WBGene00009811	F47B8.10	F47B8.10	27	34	2.17e-05	TGTACATA	contains similarity to Pfam domain PF07690 Major Facilitator Superfamily contains similarity to Interpro domains IPR000849 (GlpT transporter), IPR007114 (Major facilitator superfamily), IPR011701 (Major facilitator superfamily MFS-1), IPR002016 (Haem peroxidase, plant/fungal/bacterial)
			47	54	2.17e-05	TGTACATA
WBGene00001972	hmg-1.2	F47D12.4a.1	239	246	7.54e-05	TGTAAATA	C. elegans HMG-1.2 protein; contains similarity to Pfam domain PF00505 HMG (high mobility group) box contains similarity to Interpro domains IPR000910 (High mobility group box, HMG1/HMG2), IPR000135 (High mobility group box, HMG1/HMG2, subgroup)
			239	246	7.54e-05	TGTAAATA
			239	246	7.54e-05	TGTAAATA
			239	246	7.54e-05	TGTAAATA
			239	246	7.54e-05	TGTAAATA
WBGene00018563	F47D12.7	F47D12.7	24	31	7.54e-05	TGTAAATA	contains similarity to Pfam domains PF01344 (Kelch motif) (5), PF00651 (BTB/POZ domain) contains similarity to Interpro domains IPR000210 (BTB/POZ-like), IPR006652 (Kelch repeat type 1), IPR011333 (BTB/POZ fold), IPR015916 (Galactose oxidase, beta-propeller), IPR013069 (BTB/POZ), IPR013089 (Kelch related), IPR006651 (Kelch), IPR015915 (Kelch-type beta propeller)
WBGene00018594	aman-3	F48C1.1	45	52	9.83e-05	TGTACAAA	C. elegans AMAN-3 protein; contains similarity to Pfam domains PF07748 (Glycosyl hydrolases family 38 C-terminal domain) , PF01074 (Glycosyl hydrolases family 38 N-terminal domain) , PF09261 (Alpha mannosidase, middle domain) contains similarity to Interpro domains IPR015341 (Glycoside hydrolase, family 38, central region), IPR011682 (Glycosyl hydrolases 38, C-terminal), IPR000602 (Glycoside hydr…
WBGene00009877	F49C12.7	F49C12.7c.1	8	15	4.79e-05	TGTATATA	contains similarity to Pfam domain PF07914 Protein of unknown function (DUF1679) contains similarity to Interpro domains IPR012877 (Protein of unknown function DUF1679, Caenorhabditis species), IPR015897 (CHK kinase-like)
			8	15	4.79e-05	TGTATATA
WBGene00003150	mbk-2	F49E11.1b	646	653	7.54e-05	TGTAAATA	C. elegans MBK-2 protein; contains similarity to Pfam domain PF00069 Protein kinase domain contains similarity to Interpro domains IPR017441 (Protein kinase ATP binding, conserved site), IPR002290 (Serine/threonine protein kinase), IPR008271 (Serine/threonine protein kinase, active site), IPR000719 (Protein kinase, core), IPR001245 (Tyrosine protein kinase), IPR017442 (Serine/threonine protein ki…
			633	640	7.54e-05	TGTAAATA
WBGene00001680	gpb-2	F52A8.2	170	177	7.54e-05	TGTAAATA	C. elegans GPB-2 protein; contains similarity to Pfam domain PF00400 WD domain, G-beta repeat contains similarity to Interpro domains IPR016346 (Guanine nucleotide-binding protein, beta subunit), IPR001680 (WD40 repeat), IPR011042 (Six-bladed beta-propeller, TolB-like), IPR001632 (G-protein, beta subunit), IPR015943 (WD40/YVTN repeat-like)
WBGene00009917	glb-18	F52A8.4	224	231	7.54e-05	TGTAAATA	glb-18 is predicted to have heme binding activity, oxygen binding activity, and oxygen carrier activity; localizes to the endoplasmic reticulum; is expressed in several tissues, including the excretory gland cell, the nervous system, and the reproductive system.
WBGene00018675	F52C9.5	F52C9.5	79	86	2.17e-05	TGTACATA	contains similarity to Pfam domain PF00024 PAN domain contains similarity to Interpro domains IPR003609 (Apple-like), IPR003014 (N/apple PAN)
WBGene00004095	pqe-1	F52C9.8a	13	20	4.79e-05	TGTATATA	C. elegans PQE-1 protein ; contains similarity to Anopheles gambiae str PEST AGAP004734-PA.; TR:A0NFH8
WBGene00009974	F53C11.4	F53C11.4.1	16	23	9.83e-05	TGTACAAA	contains similarity to Mus musculus RPB5-mediating protein.; TR:Q8R5C4
WBGene00004129	pqn-42	F53G2.4a	35	42	4.79e-05	TGTATATA	C. elegans PQN-42 protein ; contains similarity to Brugia malayi Prion-like-, putative.; TR:A8Q426
WBGene00018777	F53H1.3	F53H1.3	127	134	7.54e-05	TGTAAATA	contains similarity to Pfam domain PF07792 Protein of unknown function (DUF1630) contains similarity to Interpro domain IPR012860 (Protein of unknown function DUF1630)
WBGene00010012	saeg-1	F53H10.2	320	327	7.54e-05	TGTAAATA	saeg-1 is an ortholog of human ELMSAN1 (ELM2 and Myb/SANT domain containing 1) and TRERF1 (transcriptional regulating factor 1); is predicted to have DNA binding activity and metal ion binding activity; localizes to the nucleus.
WBGene00010009	F53H4.4	F53H4.4	314	321	9.83e-05	TGTACAAA	contains similarity to Salmonella typhi Hypothetical protein STY0658.; TR:Q8Z8J9
WBGene00006816	unc-84	F54B11.3b.1	25	32	2.17e-05	TGTACATA	C. elegans UNC-84 protein ;
			33	40	2.17e-05	TGTACATA
			25	32	2.17e-05	TGTACATA
			33	40	2.17e-05	TGTACATA
WBGene00010028	F54B11.5	F54B11.5	414	421	7.54e-05	TGTAAATA	contains similarity to Pfam domain PF00097 Zinc finger, C3HC4 type (RING finger) contains similarity to Interpro domains IPR001841 (Zinc finger, RING-type), IPR013083 (Zinc finger, RING/FYVE/PHD-type)
WBGene00001117	dyf-1	F54C1.5a	84	91	4.79e-05	TGTATATA	C. elegans DYF-1 protein; contains similarity to Interpro domains IPR011990 (Tetratricopeptide-like helical), IPR013026 (Tetratricopeptide region)
WBGene00010038	rheb-1	F54C8.5	220	227	4.79e-05	TGTATATA	C. elegans RHEB-1 protein; contains similarity to Pfam domain PF00071 Ras family contains similarity to Interpro domains IPR003577 (Ras small GTPase, Ras type), IPR003578 (Ras small GTPase, Rho type), IPR005225 (Small GTP-binding protein), IPR001806 (Ras GTPase), IPR003579 (Ras small GTPase, Rab type), IPR013753 (Ras)
WBGene00010041	F54C9.3	F54C9.3	26	33	7.54e-05	TGTAAATA	contains similarity to Homo sapiens BA424I5.1; TR:Q9H4Q7
WBGene00001796	gtl-2	F54D1.5	39	46	7.54e-05	TGTAAATA	C. elegans GTL-2 protein; contains similarity to Pfam domain PF00520 Ion transport protein contains similarity to Interpro domain IPR005821 (Ion transport)
WBGene00018806	F54D10.5	F54D10.5	70	77	7.54e-05	TGTAAATA	F54D10.5 is enriched in the Z1.p, the Z4.a, the intestine, and the reproductive system based on RNA-seq studies; is affected by several genes including glp-1, dpy-10, and hsf-1 based on microarray, RNA-seq, tiling array, and proteomic studies; is affected by seven chemicals including Rotenone, manganese chloride, and Zidovudine based on RNA-seq and microarray studies.
WBGene00010061	F54E12.2	F54E12.2.1	72	79	7.54e-05	TGTAAATA	contains similarity to Pfam domains PF00271 (Helicase conserved C-terminal domain) , PF00176 (SNF2 family N-terminal domain) contains similarity to Interpro domains IPR000330 (SNF2-related), IPR014021 (Helicase, superfamily 1 and 2, ATP-binding), IPR014001 (DEAD-like helicase, N-terminal), IPR001650 (DNA/RNA helicase, C-terminal)
			72	79	7.54e-05	TGTAAATA
WBGene00004130	ketn-1	F54E2.3a	523	530	4.79e-05	TGTATATA	C. elegans KETN-1 protein; contains similarity to Pfam domains PF00047 (Immunoglobulin domain) , PF06582 (Repeat of unknown function (DUF1136)) (16), PF07679 (Immunoglobulin I-set domain) (29)contains similarity to Interpro domains IPR003598 (Immunoglobulin subtype 2), IPR013098 (Immunoglobulin I-set), IPR010939 (Protein of unknown function DUF1136), IPR013783 (Immunoglobulin-like fold), IPR00711…
			781	788	4.79e-05	TGTATATA
			523	530	4.79e-05	TGTATATA
WBGene00004321	rcn-1	F54E7.7	218	225	7.54e-05	TGTAAATA	C. elegans RCN-1 protein; contains similarity to Pfam domain PF04847 Calcipressin contains similarity to Interpro domain IPR006931 (Calcipressin)
WBGene00018830	F54E7.8	F54E7.8	40	47	9.83e-05	TGTACAAA	ska-3 is enriched in GABAergic neurons, the Z1.p, the Z4.a, and the reproductive system based on RNA-seq studies; is affected by several genes including daf-12, dpy-10, and hsf-1 based on microarray, tiling array, and RNA-seq studies; is affected by seven chemicals including Rotenone, manganese chloride, and Chlorpyrifos based on RNA-seq and microarray studies.
WBGene00018837	F54G2.1	F54G2.1b	706	713	7.54e-05	TGTAAATA	contains similarity to Pfam domain PF00168 C2 domain contains similarity to Interpro domains IPR014772 (Munc13 homology 2), IPR014770 (Munc13 homology 1), IPR000008 (C2 calcium-dependent membrane targeting)
WBGene00002081	ina-1	F54G8.3	307	314	4.79e-05	TGTATATA	C. elegans INA-1 protein; contains similarity to Pfam domains PF08441 (Integrin alpha) , PF00357 (Integrin alpha cytoplasmic region) , PF01839 (FG-GAP repeat) (2)contains similarity to Interpro domains IPR000413 (Integrins alpha chain), IPR013649 (Integrin alpha-2), IPR013513 (Integrin alpha chain, C-terminal cytoplasmic region), IPR013519 (Integrin alpha beta-propellor), IPR013517 (FG-GAP)
WBGene00000966	dhs-2	F55A12.4b	250	257	2.17e-05	TGTACATA	C. elegans DHS-2 protein; contains similarity to Pfam domain PF00106 short chain dehydrogenase contains similarity to Interpro domains IPR002347 (Glucose/ribitol dehydrogenase), IPR002198 (Short-chain dehydrogenase/reductase SDR), IPR016040 (NAD(P)-binding)
WBGene00018860	F55A4.8	F55A4.8b	19	26	2.17e-05	TGTACATA	contains similarity to Pfam domain PF07690 Major Facilitator Superfamily contains similarity to Interpro domains IPR007114 (Major facilitator superfamily), IPR011701 (Major facilitator superfamily MFS-1)
			19	26	2.17e-05	TGTACATA
WBGene00001173	egl-4	F55A8.2a.1	127	134	4.79e-05	TGTATATA	C. elegans EGL-4 protein; contains similarity to Pfam domains PF00069 (Protein kinase domain) , PF00027 (Cyclic nucleotide-binding domain) (2)contains similarity to Interpro domains IPR017441 (Protein kinase ATP binding, conserved site), IPR002290 (Serine/threonine protein kinase), IPR008271 (Serine/threonine protein kinase, active site), IPR016232 (cGMP-dependent protein kinase), IPR000719 (Prot…
WBGene00004767	sel-10	F55B12.3a	23	30	2.17e-05	TGTACATA	C. elegans SEL-10 protein; contains similarity to Pfam domains PF00646 (F-box domain) , PF00400 (WD domain, G-beta repeat) (7)contains similarity to Interpro domains IPR001810 (Cyclin-like F-box), IPR001680 (WD40 repeat), IPR011042 (Six-bladed beta-propeller, TolB-like), IPR015943 (WD40/YVTN repeat-like)
			23	30	2.17e-05	TGTACATA
WBGene00018878	glit-1	F55D10.3	12	19	7.54e-05	TGTAAATA	C. elegans GLIT-1 protein; contains similarity to Pfam domain PF00135 Carboxylesterase contains similarity to Interpro domain IPR002018 (Carboxylesterase, type B)
WBGene00004933	sod-4	F55H2.1	173	180	4.79e-05	TGTATATA	C. elegans SOD-4 protein; contains similarity to Pfam domain PF00080 Copper/zinc superoxide dismutase (SODC) contains similarity to Interpro domain IPR001424 (Superoxide dismutase, copper/zinc binding)
WBGene00004225	ptr-11	F56C11.2	123	130	9.83e-05	TGTACAAA	C. elegans PTR-11 protein; contains similarity to Pfam domain PF02460 Patched family contains similarity to Interpro domains IPR003392 (Patched), IPR000731 (Sterol-sensing 5TM box)
			56	63	4.79e-05	TGTATATA
			133	140	9.83e-05	TGTACAAA
WBGene00001748	gsp-2	F56C9.1	25	32	7.54e-05	TGTAAATA	C. elegans GSP-2 protein; contains similarity to Pfam domain PF00149 Calcineurin-like phosphoesterase contains similarity to Interpro domains IPR004843 (Metallophosphoesterase), IPR006186 (Serine/threonine-specific protein phosphatase and bis(5-nucleosyl)-tetraphosphatase)
WBGene00000548	clr-1	F56D1.4a	377	384	7.54e-05	TGTAAATA	C. elegans CLR-1 protein; contains similarity to Pfam domains PF00041 (Fibronectin type III domain) , PF00102 (Protein-tyrosine phosphatase) (2)contains similarity to Interpro domains IPR003595 (Protein-tyrosine phosphatase, catalytic), IPR008957 (Fibronectin, type III-like fold), IPR003961 (Fibronectin, type III), IPR016130 (Protein-tyrosine phosphatase, active site), IPR000242 (Protein-tyrosine…
			377	384	7.54e-05	TGTAAATA
			1771	1778	7.54e-05	TGTAAATA
WBGene00018974	F56D12.6	F56D12.6a	47	54	7.54e-05	TGTAAATA	contains similarity to Interpro domain IPR001060 (Cdc15/Fes/CIP4)
WBGene00018963	ucr-1	F56D2.1.2	502	509	4.79e-05	TGTATATA	C. elegans UCR-1 protein; contains similarity to Pfam domains PF00675 (Insulinase (Peptidase family M16)) , PF05193 (Peptidase M16 inactive domain) contains similarity to Interpro domains IPR001431 (Peptidase M16, zinc-binding site), IPR011765 (Peptidase M16, N-terminal), IPR000209 (Peptidase S8 and S53, subtilisin, kexin, sedolisin), IPR011237 (Peptidase M16, core), IPR007863 (Peptidase M16, C-t…
WBGene00018965	F56D2.3	F56D2.3	114	121	4.79e-05	TGTATATA	F56D2.3 is enriched in the OLL, the PVD, and the pharynx based on microarray and RNA-seq studies; is affected by several genes including daf-16, daf-2, and skn-1 based on microarray, tiling array, and RNA-seq studies; is affected by thirteen chemicals including 1-methylnicotinamide, manganese chloride, and D-glucose based on RNA-seq and microarray studies.
			168	175	7.54e-05	TGTAAATA
WBGene00018966	F56D2.5	F56D2.5	115	122	7.54e-05	TGTAAATA	contains similarity to Pfam domains PF05773 (RWD domain) , PF01485 (IBR domain) (2)contains similarity to Interpro domains IPR001841 (Zinc finger, RING-type), IPR006575 (RWD), IPR002867 (Zinc finger, C6HC-type)
WBGene00000493	che-14	F56H1.1	148	155	7.54e-05	TGTAAATA	C. elegans CHE-14 protein; contains similarity to Interpro domains IPR000731 (Sterol-sensing 5TM box), IPR000223 (Peptidase S26A, signal peptidase I)
WBGene00003011	lin-25	F56H9.5	83	90	7.54e-05	TGTAAATA	C. elegans LIN-25 protein ; contains similarity to Brugia malayi Putative uncharacterized protein.; TR:A8P582
WBGene00003184	mei-2	F57B10.12	7	14	7.54e-05	TGTAAATA	C. elegans MEI-2 protein ;
WBGene00004133	pqn-46	F57B9.9	31	38	7.54e-05	TGTAAATA	C. elegans PQN-46 protein ; contains similarity to Brugia malayi Putative uncharacterized protein (Fragment).; TR:A8P7I1
WBGene00010199	F57C7.1	F57C7.1b	26	33	7.54e-05	TGTAAATA	contains similarity to Pfam domain PF00439 Bromodomain contains similarity to Interpro domain IPR001487 (Bromodomain)
WBGene00019017	F57F4.4	F57F4.4.1	34	41	2.17e-05	TGTACATA	F57F4.4 localizes to the membrane raft
WBGene00003879	ora-1	F57H12.3	23	30	7.54e-05	TGTAAATA	C. elegans ORA-1 protein ; contains similarity to Brugia malayi OV39 antigen-like.; TR:A8NVF8
WBGene00010256	F58E6.7	F58E6.7	65	72	9.83e-05	TGTACAAA	contains similarity to Variola virus Protein A51.; SW:VA51_VARV
WBGene00002210	kin-29	F58H12.1	529	536	9.83e-05	TGTACAAA	C. elegans KIN-29 protein; contains similarity to Pfam domain PF00069 Protein kinase domain contains similarity to Interpro domains IPR017441 (Protein kinase ATP binding, conserved site), IPR002290 (Serine/threonine protein kinase), IPR008271 (Serine/threonine protein kinase, active site), IPR000719 (Protein kinase, core), IPR001245 (Tyrosine protein kinase), IPR017442 (Serine/threonine protein k…
WBGene00019077	F59A3.4	F59A3.4	293	300	2.17e-05	TGTACATA	contains similarity to Pfam domain PF02535 ZIP Zinc transporter contains similarity to Interpro domain IPR003689 (Zinc/iron permease)
WBGene00019078	F59A3.5	F59A3.5.1	35	42	9.83e-05	TGTACAAA	rpa-4 is enriched in the OLL, the PVD, and the germline precursor cell based on microarray and RNA-seq studies; is affected by several genes including sir-2.1, lin-28, and alg-1 based on RNA-seq, microarray, and tiling array studies; is affected by four chemicals including D-glucose, levamisole, and single-walled carbon nanotube based on RNA-seq and microarray studies; is predicted to encode a pr…
			35	42	9.83e-05	TGTACAAA
			35	42	9.83e-05	TGTACAAA
WBGene00019079	F59A3.6	F59A3.6.1	35	42	9.83e-05	TGTACAAA	contains similarity to Interpro domain IPR012340 (Nucleic acid-binding, OB-fold)
			725	732	9.83e-05	TGTACAAA
			35	42	9.83e-05	TGTACAAA
			665	672	9.83e-05	TGTACAAA
			35	42	9.83e-05	TGTACAAA
WBGene00003822	nsy-1	F59A6.1	144	151	9.83e-05	TGTACAAA	C. elegans NSY-1 protein; contains similarity to Pfam domain PF00069 Protein kinase domain contains similarity to Interpro domains IPR017441 (Protein kinase ATP binding, conserved site), IPR002290 (Serine/threonine protein kinase), IPR008271 (Serine/threonine protein kinase, active site), IPR000719 (Protein kinase, core), IPR001245 (Tyrosine protein kinase), IPR017442 (Serine/threonine protein ki…
WBGene00019090	F59A7.2	F59A7.2	12	19	7.54e-05	TGTAAATA	F59A7.2 is involved in defense response to Gram-negative bacterium.
WBGene00010319	F59B10.3	F59B10.3	147	154	7.54e-05	TGTAAATA	contains similarity to Brugia malayi Putative uncharacterized protein.; TR:A8Q0U0
WBGene00010321	F59B10.5	F59B10.5	119	126	2.17e-05	TGTACATA	contains similarity to Encephalitozoon cuniculi Hypothetical protein ECU03_0100.; TR:Q8SW77
WBGene00000401	cdh-9	F59C12.1	107	114	7.54e-05	TGTAAATA	C. elegans CDH-9 protein; contains similarity to Pfam domain PF00028 Cadherin domain contains similarity to Interpro domain IPR002126 (Cadherin)
WBGene00006402	fut-3	F59E12.13.1	30	37	4.79e-05	TGTATATA	C. elegans FUT-3 protein; contains similarity to Pfam domain PF00852 Glycosyltransferase family 10 (fucosyltransferase) contains similarity to Interpro domain IPR001503 (Glycosyl transferase, family 10)
WBGene00010353	memi-3	H02I12.5	42	49	4.79e-05	TGTATATA	memi-3 is enriched in the Z1, the Z4, the germ line, and the hypodermis based on tiling array and RNA-seq studies; is affected by several genes including daf-2, glp-1, and skn-1 based on tiling array, RNA-seq, and microarray studies; is affected by twelve chemicals including Rotenone, manganese chloride, and bisphenol A based on RNA-seq and microarray studies.
WBGene00010366	H05L14.1	H05L14.1	44	51	7.54e-05	TGTAAATA	contains similarity to Interpro domains IPR017441 (Protein kinase ATP binding, conserved site), IPR002290 (Serine/threonine protein kinase), IPR000719 (Protein kinase, core)
WBGene00010383	H12D21.7	H12D21.7.1	47	54	7.54e-05	TGTAAATA	contains similarity to Pfam domain PF00581 Rhodanese-like domain contains similarity to Interpro domains IPR001763 (Rhodanese-like), IPR000463 (Cytosolic fatty-acid binding), IPR001307 (Thiosulphate sulphurtransferase, conserved site)
			47	54	7.54e-05	TGTAAATA
WBGene00019196	H14A12.3	H14A12.3	66	73	2.17e-05	TGTACATA	contains similarity to Brugia malayi Leucine-zipper-containing transcription factor LZF, putative.; TR:A8Q6N8
WBGene00010407	H19N07.3	H19N07.3.1	58	65	7.54e-05	TGTAAATA	contains similarity to Homo sapiens Early endosome antigen 1; ENSEMBL:ENSP00000317955
			58	65	7.54e-05	TGTAAATA
WBGene00004739	scd-1	H20J18.1a	693	700	2.17e-05	TGTACATA	scd-1 is expressed in several tissues, including the body wall musculature, the intestine, the nervous system, and the reproductive system
WBGene00010418	H27A22.1	H27A22.1b	160	167	4.79e-05	TGTATATA	contains similarity to Pfam domain PF04389 Peptidase family M28 contains similarity to Interpro domain IPR007484 (Peptidase M28)
WBGene00010425	H37A05.1	H37A05.1	241	248	2.17e-05	TGTACATA	contains similarity to Pfam domains PF08235 (LNS2 (Lipin/Ned1/Smp2)) , PF04571 (lipin, N-terminal conserved region) contains similarity to Interpro domains IPR013209 (LNS2, Lipin/Ned1/Smp2), IPR007651 (Lipin, N-terminal conserved region)
WBGene00019276	H43I07.3	H43I07.3	136	143	7.54e-05	TGTAAATA	contains similarity to Pfam domain PF00535 Glycosyl transferase family 2 contains similarity to Interpro domain IPR001173 (Glycosyl transferase, family 2)
WBGene00019284	K01A2.10	K01A2.10	65	72	2.17e-05	TGTACATA	contains similarity to Brugia malayi Putative uncharacterized protein.; TR:A8Q7Q5
WBGene00019285	cbn-1	K01A2.11d	17	24	2.17e-05	TGTACATA	C. elegans CBN-1 protein; contains similarity to Pfam domain PF00036 EF hand contains similarity to Interpro domains IPR011992 (EF-Hand type), IPR002048 (Calcium-binding EF-hand)
WBGene00010467	K01D12.8	K01D12.8	42	49	4.79e-05	TGTATATA	contains similarity to Homo sapiens Isoform 4 of Dachshund homolog 1; ENSEMBL:ENSP00000346604
WBGene00010468	K01D12.9	K01D12.9	29	36	4.79e-05	TGTATATA	contains similarity to Saccharomyces cerevisiae Nucleolar protein that binds nuclear localization sequences, required for pre-rRNA processing and ribosome biogenesis; SGD:YGR159C
WBGene00010496	K02B12.3	K02B12.3.1	128	135	7.54e-05	TGTAAATA	contains similarity to Pfam domain PF00400 WD domain, G-beta repeat contains similarity to Interpro domains IPR001680 (WD40 repeat), IPR015943 (WD40/YVTN repeat-like)
WBGene00010501	K02C4.2	K02C4.2	19	26	7.54e-05	TGTAAATA	contains similarity to Brugia pahangi Alt-1 protein.; TR:O96781
WBGene00019304	K02D10.4	K02D10.4	625	632	7.54e-05	TGTAAATA	K02D10.4 is enriched in the amphid sensillum, the body wall muscle cell, and the nervous system based on tiling array, RNA-seq, and microarray studies; is affected by several genes including daf-16, daf-2, and daf-12 based on microarray, tiling array, and RNA-seq studies; is affected by five chemicals including stavudine, Cadmium, and Quercetin based on RNA-seq and microarray studies.
WBGene00019300	K02D7.5	K02D7.5	218	225	2.17e-05	TGTACATA	contains similarity to Pfam domain PF03083 MtN3/saliva family contains similarity to Interpro domain IPR004316 (MtN3 and saliva related transmembrane protein)
WBGene00019319	K02E10.5	K02E10.5	75	82	2.17e-05	TGTACATA	K02E10.5 is enriched in the nervous system based on tiling array and microarray studies; is affected by several genes including age-1, sir-2.1, and egl-5 based on microarray and RNA-seq studies.
WBGene00019316	K02E7.12	K02E7.12.1	48	55	7.54e-05	TGTAAATA	K02E7.12 is enriched in the body wall musculature and the coelomocyte based on tiling array and microarray studies; is affected by several genes including pgl-1, glh-1, and hpl-2 based on RNA-seq and microarray studies.
			48	55	7.54e-05	TGTAAATA
WBGene00019327	zip-2	K02F3.4.1	43	50	2.17e-05	TGTACATA	C. elegans ZIP-2 protein; contains similarity to Pfam domain PF07716 Basic region leucine zipper contains similarity to Interpro domains IPR011700 (Basic leucine zipper), IPR004827 (Basic-leucine zipper (bZIP) transcription factor)
			43	50	2.17e-05	TGTACATA
WBGene00000176	aqp-8	K02G10.7a	232	239	4.79e-05	TGTATATA	C. elegans AQP-8 protein; contains similarity to Pfam domain PF00230 Major intrinsic protein contains similarity to Interpro domain IPR000425 (Major intrinsic protein)
WBGene00019354	K03B4.2	K03B4.2	337	344	2.17e-05	TGTACATA	K03B4.2 is enriched in the germ line and the nervous system based on microarray and RNA-seq studies; is affected by several genes including gld-1, hsf-1, and clk-1 based on microarray and RNA-seq studies; is affected by nine chemicals including Rotenone, Cry5B, and Alovudine based on RNA-seq and microarray studies.
WBGene00019357	cpg-8	K03B4.7a.1	36	43	2.17e-05	TGTACATA	C. elegans CPG-8 protein ;
			36	43	2.17e-05	TGTACATA
			393	400	2.17e-05	TGTACATA
WBGene00004764	sel-7	K04G11.2	177	184	2.17e-05	TGTACATA	C. elegans SEL-7 protein ; contains similarity to Brugia malayi Putative uncharacterized protein.; TR:A8PRH3
WBGene00003986	pes-22	K05B2.5c	304	311	7.54e-05	TGTAAATA	C. elegans PES-22 protein; contains similarity to Pfam domain PF07690 Major Facilitator Superfamily contains similarity to Interpro domains IPR007114 (Major facilitator superfamily), IPR011701 (Major facilitator superfamily MFS-1)
WBGene00010615	K07A1.9	K07A1.9c	498	505	9.83e-05	TGTACAAA	contains similarity to Borrelia andersonii OspE-related lipoprotein (Fragment).; TR:O68291
WBGene00000200	arx-2	K07C5.1	192	199	7.54e-05	TGTAAATA	C. elegans ARX-2 protein; contains similarity to Pfam domain PF00022 Actin contains similarity to Interpro domains IPR004001 (Actin, conserved site), IPR004000 (Actin/actin-like)
WBGene00010631	cash-1	K07C5.8	307	314	7.54e-05	TGTAAATA	C. elegans CASH-1 protein; contains similarity to Pfam domains PF08232 (Striatin family) , PF00400 (WD domain, G-beta repeat) (5)contains similarity to Interpro domains IPR013258 (Striatin, N-terminal), IPR001969 (Peptidase aspartic, active site), IPR001680 (WD40 repeat), IPR011042 (Six-bladed beta-propeller, TolB-like), IPR015943 (WD40/YVTN repeat-like)
WBGene00003497	mup-4	K07D8.1.1	56	63	2.17e-05	TGTACATA	mup-4 is an ortholog of human FBN1, FBN2, and FBN3; is predicted to have calcium ion binding activity; localizes to the hemidesmosome and hemidesmosome associated protein complex; is expressed in the body wall musculature, the hypodermis, the pharynx, and touch receptor neurons; human orthologs of this gene are implicated in Weill-Marchesani syndrome, distal arthrogryposis, and eye disease (multi…
			56	63	2.17e-05	TGTACATA
WBGene00019489	K07E1.1	K07E1.1	172	179	7.54e-05	TGTAAATA	contains similarity to Pfam domain PF03079 ARD/ARD' family contains similarity to Interpro domains IPR004313 (Acireductone dioxygenase, ARD), IPR014710 (RmlC-like jelly roll fold)
			83	90	9.83e-05	TGTACAAA
WBGene00019492	K07E3.4	K07E3.4a.1	83	90	7.54e-05	TGTAAATA	contains similarity to Pfam domain PF01268 Formate--tetrahydrofolate ligase contains similarity to Interpro domain IPR000559 (Formate-tetrahydrofolate ligase, FTHFS)
			83	90	7.54e-05	TGTAAATA
			83	90	7.54e-05	TGTAAATA
WBGene00001477	fmo-2	K08C7.5	17	24	7.54e-05	TGTAAATA	C. elegans FMO-2 protein; contains similarity to Pfam domain PF00743 Flavin-binding monooxygenase-like contains similarity to Interpro domains IPR012143 (Dimethylaniline monooxygenase, N-oxide-forming), IPR002253 (Flavin-containing monooxygenase (FMO) 1), IPR000960 (Flavin-containing monooxygenase FMO), IPR002257 (Flavin-containing monooxygenase (FMO) 5), IPR001327 (Pyridine nucleotide-disulphide…
WBGene00000168	apx-1	K08D9.3	554	561	7.54e-05	TGTAAATA	C. elegans APX-1 protein; contains similarity to Pfam domains PF00008 (EGF-like domain) (2), PF07974 (EGF-like domain) , PF01414 (Delta serrate ligand) contains similarity to Interpro domains IPR001774 (Delta/Serrate/lag-2 (DSL) protein), IPR000742 (EGF-like, type 3), IPR006209 (EGF-like), IPR006210 (EGF), IPR000981 (Neurohypophysial hormone), IPR013032 (EGF-like region, conserved site), IPR01311…
WBGene00010665	K08E3.5	K08E3.5f	146	153	7.54e-05	TGTAAATA	contains similarity to Pfam domain PF01704 UTP--glucose-1-phosphate uridylyltransferase contains similarity to Interpro domains IPR016267 (UTP--glucose-1-phosphate uridylyltransferase, subgroup), IPR002618 (UTP--glucose-1-phosphate uridylyltransferase)
WBGene00002368	let-99	K08E7.3	21	28	4.79e-05	TGTATATA	C. elegans LET-99 protein; contains similarity to Pfam domain PF00610 Domain found in Dishevelled, Egl-10, and Pleckstrin contains similarity to Interpro domain IPR000591 (Pleckstrin/ G-protein, interacting region)
WBGene00010673	K08E7.5	K08E7.5c	33	40	2.17e-05	TGTACATA	contains similarity to Leishmania braziliensis Proteophosphoglycan ppg4.; TR:A4HM86
WBGene00010681	K08F8.1	K08F8.1a.2	109	116	7.54e-05	TGTAAATA	contains similarity to Pfam domain PF00069 Protein kinase domain contains similarity to Interpro domains IPR017441 (Protein kinase ATP binding, conserved site), IPR002290 (Serine/threonine protein kinase), IPR008271 (Serine/threonine protein kinase, active site), IPR000719 (Protein kinase, core), IPR001245 (Tyrosine protein kinase), IPR017442 (Serine/threonine protein kinase-related)
			109	116	7.54e-05	TGTAAATA
			539	546	7.54e-05	TGTAAATA
			592	599	7.54e-05	TGTAAATA
			641	648	7.54e-05	TGTAAATA
WBGene00002263	lea-1	K08H10.1.1	25	32	2.17e-05	TGTACATA	C. elegans LEA-1 protein; contains similarity to Pfam domain PF02987 Late embryogenesis abundant protein contains similarity to Interpro domain IPR004238 (Late embryogenesis abundant protein)
			108	115	4.79e-05	TGTATATA
WBGene00010699	K08H10.9	K08H10.9	34	41	4.79e-05	TGTATATA	contains similarity to Pfam domain PF04051 Transport protein particle (TRAPP) component, Bet3 contains similarity to Interpro domain IPR007194 (Transport protein particle (TRAPP) component, Bet3)
WBGene00010700	nipi-3	K09A9.1	9	16	7.54e-05	TGTAAATA	C. elegans NIPI-3 protein; contains similarity to Pfam domain PF00069 Protein kinase domain contains similarity to Interpro domains IPR002290 (Serine/threonine protein kinase), IPR000719 (Protein kinase, core), IPR017442 (Serine/threonine protein kinase-related)
			822	829	9.83e-05	TGTACAAA
WBGene00019550	K09C4.5	K09C4.5	38	45	2.17e-05	TGTACATA	contains similarity to Pfam domain PF07690 Major Facilitator Superfamily contains similarity to Interpro domains IPR007114 (Major facilitator superfamily), IPR011701 (Major facilitator superfamily MFS-1)
WBGene00010720	K09E4.2	K09E4.2	95	102	4.79e-05	TGTATATA	contains similarity to Pfam domain PF05208 ALG3 protein contains similarity to Interpro domains IPR007873 (ALG3), IPR013838 (Beta tubulin, autoregulation binding site)
WBGene00001053	dop-2	K09G1.4b	116	123	9.83e-05	TGTACAAA	C. elegans DOP-2 protein; contains similarity to Pfam domain PF00001 7 transmembrane receptor (rhodopsin family) contains similarity to Interpro domains IPR017452 (GPCR, rhodopsin-like superfamily), IPR000276 (GPCR, rhodopsin-like)
WBGene00019595	dscc-1	K09H9.2.1	17	24	7.54e-05	TGTAAATA	dscc-1 is an ortholog of human DSCC1; is predicted to encode a protein with the following domain: Sister chromatid cohesion protein Dcc1
WBGene00000626	col-49	K09H9.3	10	17	7.54e-05	TGTAAATA	C. elegans COL-49 protein; contains similarity to Pfam domains PF01484 (Nematode cuticle collagen N-terminal domain) , PF01391 (Collagen triple helix repeat (20 copies)) (3)contains similarity to Interpro domains IPR002486 (Nematode cuticle collagen, N-terminal), IPR008161 (Collagen helix repeat), IPR008160 (Collagen triple helix repeat)
WBGene00019606	clec-88	K10B2.3a.1	4	11	7.54e-05	TGTAAATA	clec-88 is an ortholog of human CLEC17A (C-type lectin domain containing 17A), KLRF2, and KLRF1; is predicted to have carbohydrate binding activity
			4	11	7.54e-05	TGTAAATA
WBGene00003639	nhr-49	K10C3.6a	142	149	2.17e-05	TGTACATA	C. elegans NHR-49 protein; contains similarity to Pfam domains PF00104 (Ligand-binding domain of nuclear hormone receptor) , PF00105 (Zinc finger, C4 type (two domains)) contains similarity to Interpro domains IPR008946 (Nuclear hormone receptor, ligand-binding), IPR001723 (Steroid hormone receptor), IPR000324 (Vitamin D receptor), IPR013088 (Zinc finger, NHR/GATA-type), IPR001628 (Zinc finger, n…
			142	149	2.17e-05	TGTACATA
			142	149	2.17e-05	TGTACATA
			142	149	2.17e-05	TGTACATA
WBGene00019628	pup-2	K10D2.2.1	225	232	2.17e-05	TGTACATA	C. elegans PUP-2 protein; contains similarity to Pfam domain PF03828 Poly(A) polymerase contains similarity to Interpro domain IPR002058 (PAP/25A-associated)
WBGene00003374	mlk-1	K11D12.10b	224	231	9.83e-05	TGTACAAA	C. elegans MLK-1 protein; contains similarity to Pfam domains PF07714 (Protein tyrosine kinase) , PF00018 (SH3 domain) contains similarity to Interpro domains IPR002290 (Serine/threonine protein kinase), IPR008271 (Serine/threonine protein kinase, active site), IPR001452 (Src homology-3), IPR000719 (Protein kinase, core), IPR001245 (Tyrosine protein kinase)
WBGene00010769	asah-1	K11D2.2	56	63	7.54e-05	TGTAAATA	C. elegans ASAH-1 protein; contains similarity to Pfam domain PF02275 Linear amide C-N hydrolases, choloylglycine hydrolase family contains similarity to Interpro domains IPR003199 (Choloylglycine hydrolase), IPR016699 (Acid ceramidase-like)
WBGene00010772	K11D9.3	K11D9.3.1	10	17	9.83e-05	TGTACAAA	contains similarity to Pfam domain PF07690 Major Facilitator Superfamily contains similarity to Interpro domains IPR007114 (Major facilitator superfamily), IPR011701 (Major facilitator superfamily MFS-1), IPR005829 (Sugar transporter, conserved site)
			10	17	9.83e-05	TGTACAAA
WBGene00019664	K11H12.8	K11H12.8a	32	39	7.54e-05	TGTAAATA	contains similarity to Interpro domain IPR006214 (Protein of unknown function UPF0005)
			729	736	7.54e-05	TGTAAATA
WBGene00010780	K11H3.3	K11H3.3	348	355	7.54e-05	TGTAAATA	contains similarity to Pfam domain PF00153 Mitochondrial carrier protein contains similarity to Interpro domain IPR001993 (Mitochondrial substrate carrier)
WBGene00019667	K12B6.2	K12B6.2	357	364	7.54e-05	TGTAAATA	contains similarity to Pfam domain PF07782 DC-STAMP-like protein contains similarity to Interpro domain IPR012858 (DC-STAMP-like)
WBGene00003515	myo-3	K12F2.1	42	49	9.83e-05	TGTACAAA	C. elegans MYO-3 protein; contains similarity to Pfam domains PF01576 (Myosin tail) , PF00612 (IQ calmodulin-binding motif) , PF02736 (Myosin N-terminal SH3-like domain) , PF00063 (Myosin head (motor domain)) contains similarity to Interpro domains IPR004009 (Myosin, N-terminal, SH3-like), IPR000048 (IQ calmodulin-binding region), IPR002928 (Myosin tail), IPR001609 (Myosin head, motor region)
WBGene00010790	sodh-1	K12G11.3	50	57	4.79e-05	TGTATATA	C. elegans SODH-1 protein; contains similarity to Pfam domains PF00107 (Zinc-binding dehydrogenase) , PF08240 (Alcohol dehydrogenase GroES-like domain) contains similarity to Interpro domains IPR013149 (Alcohol dehydrogenase, zinc-binding), IPR013154 (Alcohol dehydrogenase GroES-like), IPR002085 (Alcohol dehydrogenase superfamily, zinc-containing), IPR016040 (NAD(P)-binding), IPR002328 (Alcohol d…
WBGene00006594	tom-1	M01A10.2a	47	54	2.17e-05	TGTACATA	C. elegans TOM-1 protein; contains similarity to Pfam domains PF08366 (LLGL2) , PF00400 (WD domain, G-beta repeat) (2)contains similarity to Interpro domains IPR013577 (Lethal giant larvae homologue 2), IPR001680 (WD40 repeat), IPR000664 (Lethal(2) giant larvae protein), IPR015943 (WD40/YVTN repeat-like)
WBGene00006508	tag-163	M01E11.7a	255	262	4.79e-05	TGTATATA	C. elegans TAG-163 protein; contains similarity to Pfam domains PF08416 (Phosphotyrosine-binding domain) , PF00017 (SH2 domain) contains similarity to Interpro domains IPR013625 (Tensin phosphotyrosine-binding domain), IPR011993 (Pleckstrin homology-type), IPR006020 (Phosphotyrosine interaction region), IPR000980 (SH2 motif)
			255	262	4.79e-05	TGTATATA
			255	262	4.79e-05	TGTATATA
			255	262	4.79e-05	TGTATATA
WBGene00010809	M01F1.3	M01F1.3.1	14	21	7.54e-05	TGTAAATA	contains similarity to Pfam domain PF04055 Radical SAM superfamily contains similarity to Interpro domains IPR013785 (Aldolase-type TIM barrel), IPR003698 (Lipoate synthase), IPR007197 (Radical SAM), IPR006638 (Elongator protein 3/MiaB/NifB)
WBGene00019719	M01H9.3	M01H9.3a.1	273	280	4.79e-05	TGTATATA
			159	166	7.54e-05	TGTAAATA
			273	280	4.79e-05	TGTATATA
			159	166	7.54e-05	TGTAAATA
WBGene00019721	M01H9.5	M01H9.5	64	71	7.54e-05	TGTAAATA	M01H9.3 is enriched in the coelomocyte, the germ line, the intestine, and the nervous system based on microarray, tiling array, and RNA-seq studies; is affected by several genes including daf-16, daf-2, and daf-12 based on microarray, tiling array, RNA-seq, and proteomic studies; is affected by ten chemicals including Rotenone, stavudine, and Zidovudine based on RNA-seq and microarray studies.
WBGene00000287	cal-3	M02B7.6	126	133	2.17e-05	TGTACATA	C. elegans CAL-3 protein; contains similarity to Pfam domain PF00036 EF hand contains similarity to Interpro domains IPR011992 (EF-Hand type), IPR002048 (Calcium-binding EF-hand)
WBGene00019737	M02F4.3	M02F4.3	451	458	2.17e-05	TGTACATA	contains similarity to Brugia malayi Ancient conserved domain protein 4, putative.; TR:A8PTD2
WBGene00010835	M03B6.3	M03B6.3	40	47	9.83e-05	TGTACAAA	contains similarity to Homo sapiens Max-binding protein MNT; ENSEMBL:ENSP00000174618
WBGene00019757	gosr-2.2	M03E7.5.1	5	12	7.54e-05	TGTAAATA	C. elegans GOSR-2.2 protein; contains similarity to Pfam domain PF05008 Vesicle transport v-SNARE protein contains similarity to Interpro domain IPR007705 (Vesicle transport v-SNARE)
WBGene00019771	M04F3.5	M04F3.5	160	167	4.79e-05	TGTATATA	contains similarity to Pfam domain PF08397 IRSp53/MIM homology domain contains similarity to Interpro domain IPR013606 (IRSp53/MIM homology domain (IMD))
WBGene00010879	M05D6.6	M05D6.6.1	34	41	9.83e-05	TGTACAAA	contains similarity to Anolis roquet Cytochrome b (Fragment).; TR:Q9B1A4
			34	41	9.83e-05	TGTACAAA
			34	41	9.83e-05	TGTACAAA
WBGene00010911	M106.3	M106.3b.1	268	275	7.54e-05	TGTAAATA	contains similarity to Pfam domains PF00107 (Zinc-binding dehydrogenase) , PF08240 (Alcohol dehydrogenase GroES-like domain) contains similarity to Interpro domains IPR013149 (Alcohol dehydrogenase, zinc-binding), IPR013154 (Alcohol dehydrogenase GroES-like), IPR002085 (Alcohol dehydrogenase superfamily, zinc-containing), IPR016040 (NAD(P)-binding)
WBGene00010943	M176.4	M176.4	21	28	2.17e-05	TGTACATA	contains similarity to Pfam domain PF07947 YhhN-like protein contains similarity to Interpro domain IPR012506 (YhhN-like)
WBGene00010888	dlc-2	M18.2	17	24	7.54e-05	TGTAAATA	C. elegans DLC-2 protein; contains similarity to Pfam domain PF01221 Dynein light chain type 1 contains similarity to Interpro domain IPR001372 (Dynein light chain, type 1 and 2)
WBGene00010907	M88.4	M88.4	21	28	7.54e-05	TGTAAATA	contains similarity to Interpro domains IPR011993 (Pleckstrin homology-type), IPR006020 (Phosphotyrosine interaction region)
WBGene00003915	pan-1	M88.6a	108	115	7.54e-05	TGTAAATA	C. elegans PAN-1 protein; contains similarity to Pfam domain PF00560 Leucine Rich Repeat contains similarity to Interpro domains IPR001611 (Leucine-rich repeat), IPR003591 (Leucine-rich repeat, typical subtype)
WBGene00019803	PDB1.1	PDB1.1b.1	40	47	2.17e-05	TGTACATA	contains similarity to Pfam domain PF01545 Cation efflux family contains similarity to Interpro domain IPR002524 (Cation efflux protein)
			40	47	2.17e-05	TGTACATA
WBGene00000534	cpi-2	R01B10.1a	102	109	2.17e-05	TGTACATA	C. elegans CPI-2 protein; contains similarity to Pfam domain PF00031 Cystatin domain contains similarity to Interpro domains IPR003243 (Proteinase inhibitor I25A and I25B, type 2 and phytocystatins), IPR000010 (Proteinase inhibitor I25, cystatin)
WBGene00019807	jamp-1	R01B10.5.1	654	661	4.79e-05	TGTATATA	C. elegans JAMP-1 protein; contains similarity to Pfam domain PF05571 Protein of unknown function (DUF766) contains similarity to Interpro domain IPR008485 (Protein of unknown function DUF766)
WBGene00010975	R01H10.7	R01H10.7	148	155	2.17e-05	TGTACATA	contains similarity to Brugia malayi Protein R01H10.7, putative.; TR:A8Q8U9
WBGene00006419	oac-39	R02C2.3	22	29	4.79e-05	TGTATATA	C. elegans OAC-39 protein; contains similarity to Pfam domain PF01757 Acyltransferase family contains similarity to Interpro domains IPR002656 (Acyltransferase 3), IPR006621 (Nose resistant to fluoxetine-4, N-terminal)
WBGene00019830	hrg-1	R02E12.6.1	23	30	2.17e-05	TGTACATA	C. elegans HRG-1 protein ; contains similarity to Homo sapiens FLJ20489 protein; VG:OTTHUMP00000167239
			23	30	2.17e-05	TGTACATA
			23	30	2.17e-05	TGTACATA
WBGene00044724	R02E4.3	R02E4.3	27	34	4.79e-05	TGTATATA	R02E4.3 is enriched in several tissues, including the excretory cell, the hypodermis, the intestine, and the nervous system based on tiling array and RNA-seq studies; is affected by several genes including daf-16, daf-2, and daf-12 based on tiling array, RNA-seq, and microarray studies; is affected by twelve chemicals including Ethanol, 1-methylnicotinamide, and Tunicamycin based on RNA-seq and m…
WBGene00019833	R02F2.4	R02F2.4	13	20	4.79e-05	TGTATATA	contains similarity to Pfam domain PF01607 Chitin binding Peritrophin-A domain contains similarity to Interpro domain IPR002557 (Chitin binding protein, peritrophin-A)
WBGene00010985	R03A10.5	R03A10.5	60	67	7.54e-05	TGTAAATA	contains similarity to Pfam domains PF01105 (emp24/gp25L/p24 family/GOLD) , PF00650 (CRAL/TRIO domain) contains similarity to Interpro domains IPR001251 (Cellular retinaldehyde-binding/triple function, C-terminal), IPR000348 (emp24/gp25L/p24)
WBGene00001169	eft-4	R03G5.1a.1	163	170	9.83e-05	TGTACAAA	C. elegans EFT-4 protein; contains similarity to Pfam domains PF03143 (Elongation factor Tu C-terminal domain) , PF03144 (Elongation factor Tu domain 2) , PF00009 (Elongation factor Tu GTP binding domain) contains similarity to Interpro domains IPR000795 (Protein synthesis factor, GTP-binding), IPR004160 (Translation elongation factor EFTu/EF1A, C-terminal), IPR004161 (Translation elongation fact…
			163	170	9.83e-05	TGTACAAA
			699	706	9.83e-05	TGTACAAA
			699	706	9.83e-05	TGTACAAA
WBGene00019872	R04E5.9	R04E5.9	712	719	2.17e-05	TGTACATA	contains similarity to Homo sapiens Triadin; ENSEMBL:ENSP00000333984
WBGene00001624	glt-6	R05G6.6	102	109	2.17e-05	TGTACATA	C. elegans GLT-6 protein; contains similarity to Pfam domain PF00375 Sodium:dicarboxylate symporter family contains similarity to Interpro domain IPR001991 (Sodium:dicarboxylate symporter)
WBGene00019901	R05G6.9	R05G6.9	37	44	4.79e-05	TGTATATA	contains similarity to Pfam domain PF00008 EGF-like domain contains similarity to Interpro domains IPR000742 (EGF-like, type 3), IPR006209 (EGF-like), IPR006210 (EGF), IPR001881 (EGF-like calcium-binding), IPR013032 (EGF-like region, conserved site)
WBGene00011039	R05H5.4	R05H5.4	2	9	7.54e-05	TGTAAATA	contains similarity to Pfam domain PF07714 Protein tyrosine kinase contains similarity to Interpro domains IPR017441 (Protein kinase ATP binding, conserved site), IPR002290 (Serine/threonine protein kinase), IPR000719 (Protein kinase, core), IPR001245 (Tyrosine protein kinase), IPR000980 (SH2 motif), IPR008266 (Tyrosine protein kinase, active site)
WBGene00019911	R06A10.4	R06A10.4	28	35	7.54e-05	TGTAAATA	contains similarity to Pfam domain PF00069 Protein kinase domain contains similarity to Interpro domains IPR017441 (Protein kinase ATP binding, conserved site), IPR002290 (Serine/threonine protein kinase), IPR008271 (Serine/threonine protein kinase, active site), IPR000719 (Protein kinase, core), IPR001245 (Tyrosine protein kinase), IPR017442 (Serine/threonine protein kinase-related)
WBGene00002348	myo-1	R06C7.10	527	534	7.54e-05	TGTAAATA	myo-1 is an ortholog of human MYH3 (myosin heavy chain 3), MYH15 (myosin heavy chain 15), and MYH7B (myosin heavy chain 7B); is a structural constituent of muscle; is involved in inositol lipid-mediated signaling, muscle contraction, and pharyngeal pumping; localizes to the striated muscle myosin thick filament; is expressed in the pharynx; human orthologs of this gene are implicated in several d…
WBGene00011067	vps-11	R06F6.2	14	21	7.54e-05	TGTAAATA	C. elegans VPS-11 protein; contains similarity to Interpro domains IPR001841 (Zinc finger, RING-type), IPR016528 (Vacuolar protein sorting-associated protein 11), IPR013083 (Zinc finger, RING/FYVE/PHD-type)
WBGene00011095	gana-1	R07B7.11	15	22	4.79e-05	TGTATATA	C. elegans GANA-1 protein; contains similarity to Pfam domain PF02065 Melibiase contains similarity to Interpro domains IPR013785 (Aldolase-type TIM barrel), IPR002241 (Glycoside hydrolase, family 27), IPR000111 (Glycoside hydrolase, clan GH-D), IPR013780 (Glycosyl hydrolase, family 13, all-beta)
WBGene00011106	acl-5	R07E3.5a	28	35	9.83e-05	TGTACAAA	C. elegans ACL-5 protein; contains similarity to Pfam domain PF01553 Acyltransferase contains similarity to Interpro domain IPR002123 (Phospholipid/glycerol acyltransferase)
WBGene00011115	R07E5.7	R07E5.7.1	127	134	2.17e-05	TGTACATA	contains similarity to Pfam domain PF09446 VMA21-like domain
WBGene00004199	prx-14	R07H5.1	16	23	7.54e-05	TGTAAATA	C. elegans PRX-14 protein; contains similarity to Pfam domain PF04695 Peroxisomal membrane anchor protein (Pex14p) conserved region contains similarity to Interpro domain IPR006785 (Peroxisome membrane anchor protein Pex14p, N-terminal)
WBGene00019960	ztf-16	R08E3.4a	600	607	4.79e-05	TGTATATA	C. elegans ZTF-16 protein; contains similarity to Pfam domain PF00096 Zinc finger, C2H2 type contains similarity to Interpro domains IPR015880 (Zinc finger, C2H2-like), IPR013087 (Zinc finger, C2H2-type/integrase, DNA-binding), IPR007087 (Zinc finger, C2H2-type)
WBGene00004139	pqn-54	R09B5.5	30	37	4.79e-05	TGTATATA	C. elegans PQN-54 protein; contains similarity to Pfam domains PF06493 (Protein of unknown function (DUF1096)) , PF02363 (Cysteine rich repeat) (9)contains similarity to Interpro domains IPR003341 (Cysteine rich repeat, tripleX), IPR009475 (Protein of unknown function DUF1096)
WBGene00000032	abu-9	R09F10.2	30	37	4.79e-05	TGTATATA	C. elegans ABU-9 protein; contains similarity to Pfam domains PF06493 (Protein of unknown function (DUF1096)) , PF02363 (Cysteine rich repeat) (9)contains similarity to Interpro domains IPR003341 (Cysteine rich repeat, tripleX), IPR009475 (Protein of unknown function DUF1096)
WBGene00003600	nhr-1	R09G11.2a.1	258	265	4.79e-05	TGTATATA	C. elegans NHR-1 protein; contains similarity to Pfam domains PF00104 (Ligand-binding domain of nuclear hormone receptor) , PF00105 (Zinc finger, C4 type (two domains)) contains similarity to Interpro domains IPR008946 (Nuclear hormone receptor, ligand-binding), IPR001723 (Steroid hormone receptor), IPR000324 (Vitamin D receptor), IPR013088 (Zinc finger, NHR/GATA-type), IPR001628 (Zinc finger, nu…
			258	265	4.79e-05	TGTATATA
WBGene00003518	nac-2	R107.1.1	5	12	9.83e-05	TGTACAAA	C. elegans NAC-2 protein; contains similarity to Pfam domain PF00939 Sodium:sulfate symporter transmembrane region contains similarity to Interpro domain IPR001898 (Sodium/sulphate symporter)
WBGene00011299	ikke-1	R107.4a	381	388	4.79e-05	TGTATATA	C. elegans IKKE-1 protein; contains similarity to Pfam domain PF00069 Protein kinase domain contains similarity to Interpro domains IPR017441 (Protein kinase ATP binding, conserved site), IPR002290 (Serine/threonine protein kinase), IPR008271 (Serine/threonine protein kinase, active site), IPR000719 (Protein kinase, core), IPR001245 (Tyrosine protein kinase), IPR017442 (Serine/threonine protein k…
			136	143	7.54e-05	TGTAAATA
			251	258	4.79e-05	TGTATATA
			6	13	7.54e-05	TGTAAATA
			460	467	4.79e-05	TGTATATA
			215	222	7.54e-05	TGTAAATA
WBGene00019993	rbx-2	R10A10.2	163	170	7.54e-05	TGTAAATA	C. elegans RBX-2 protein; contains similarity to Interpro domains IPR001841 (Zinc finger, RING-type), IPR013083 (Zinc finger, RING/FYVE/PHD-type), IPR001526 (CD59 antigen)
WBGene00011218	R10E11.6	R10E11.6a	27	34	7.54e-05	TGTAAATA	contains similarity to Interpro domains IPR011992 (EF-Hand type), IPR000261 (EPS15 homology (EH))
			385	392	7.54e-05	TGTAAATA
WBGene00011221	R10E12.2	R10E12.2	144	151	7.54e-05	TGTAAATA	contains similarity to Brugia malayi Hypothetical 35.9 kDa protein C05B5.4 in chromosome III, putative.; TR:A8Q701
WBGene00011199	tag-310	R10E4.2a.1	671	678	2.17e-05	TGTACATA	C. elegans TAG-310 protein; contains similarity to Pfam domain PF00076 RNA recognition motif. (a.k.a. RRM, RBD, or RNP domain) contains similarity to Interpro domains IPR012677 (Nucleotide-binding, alpha-beta plait), IPR000504 (RNA recognition motif, RNP-1)
			1126	1133	7.54e-05	TGTAAATA
WBGene00011248	R11D1.10	R11D1.10a	48	55	7.54e-05	TGTAAATA	contains similarity to Interpro domains IPR000306 (Zinc finger, FYVE-type), IPR013083 (Zinc finger, RING/FYVE/PHD-type), IPR017455 (Zinc finger, FYVE-related)
WBGene00000984	dhs-21	R11D1.11	27	34	4.79e-05	TGTATATA	C. elegans DHS-21 protein; contains similarity to Pfam domain PF00106 short chain dehydrogenase contains similarity to Interpro domains IPR002424 (Insect alcohol dehydrogenase family), IPR003560 (2,3-dihydro-2,3-dihydroxybenzoate dehydrogenase), IPR002347 (Glucose/ribitol dehydrogenase), IPR002198 (Short-chain dehydrogenase/reductase SDR), IPR016040 (NAD(P)-binding)
WBGene00020007	R11F4.1	R11F4.1.1	176	183	7.54e-05	TGTAAATA	contains similarity to Pfam domains PF02782 (FGGY family of carbohydrate kinases, C-terminal domain) , PF00370 (FGGY family of carbohydrate kinases, N-terminal domain) contains similarity to Interpro domains IPR005999 (Glycerol kinase), IPR000577 (Carbohydrate kinase, FGGY)
WBGene00007016	mdt-15	R12B2.5b.1	64	71	9.83e-05	TGTACAAA	C. elegans MDT-15 protein; contains similarity to Pfam domain PF09606 ARC105 domain
			64	71
WBGene00020030	R12E2.1	R12E2.1	257	264	2.17e-05	TGTACATA	contains similarity to Pfam domains PF01344 (Kelch motif) (5), PF00651 (BTB/POZ domain) , PF07707 (BTB And C-terminal Kelch) contains similarity to Interpro domains IPR017096 (Kelch-like protein, gigaxonin), IPR000210 (BTB/POZ-like), IPR006652 (Kelch repeat type 1), IPR011333 (BTB/POZ fold), IPR015916 (Galactose oxidase, beta-propeller), IPR013069 (BTB/POZ), IPR011705 (BTB/Kelch-associated), IPR0…
WBGene00020108	R151.4	R151.4a	48	55	9.83e-05	TGTACAAA	contains similarity to Pfam domain PF07714 Protein tyrosine kinase contains similarity to Interpro domains IPR017441 (Protein kinase ATP binding, conserved site), IPR002290 (Serine/threonine protein kinase), IPR000719 (Protein kinase, core), IPR001245 (Tyrosine protein kinase), IPR008266 (Tyrosine protein kinase, active site)
WBGene00011304	mnk-1	R166.5a	974	981	2.17e-05	TGTACATA	C. elegans MNK-1 protein; contains similarity to Pfam domain PF00069 Protein kinase domain contains similarity to Interpro domains IPR017441 (Protein kinase ATP binding, conserved site), IPR002290 (Serine/threonine protein kinase), IPR008271 (Serine/threonine protein kinase, active site), IPR000719 (Protein kinase, core), IPR001245 (Tyrosine protein kinase), IPR017442 (Serine/threonine protein ki…
			290	297	7.54e-05	TGTAAATA
			439	446	9.83e-05	TGTACAAA
			843	850	9.83e-05	TGTACAAA
WBGene00001207	egl-43	R53.3a	782	789	2.17e-05	TGTACATA	C. elegans EGL-43 protein; contains similarity to Pfam domain PF00096 Zinc finger, C2H2 type contains similarity to Interpro domains IPR015880 (Zinc finger, C2H2-like), IPR013087 (Zinc finger, C2H2-type/integrase, DNA-binding), IPR007087 (Zinc finger, C2H2-type)
			782	789	2.17e-05	TGTACATA
WBGene00011284	ttr-27	R90.2	24	31	7.54e-05	TGTAAATA	C. elegans TTR-27 protein; contains similarity to Pfam domain PF01060 Transthyretin-like family contains similarity to Interpro domain IPR001534 (Transthyretin-like)
WBGene00011287	glb-24	R90.5	380	387	2.17e-05	TGTACATA	C. elegans GLB-24 protein; contains similarity to Interpro domains IPR012292 (Globin), IPR003006 (Immunoglobulin/major histocompatibility complex, conserved site)
WBGene00001703	grd-14	T01B10.2	96	103	7.54e-05	TGTAAATA	C. elegans GRD-14 protein ;
WBGene00020135	T01B6.3	T01B6.3b	408	415	7.54e-05	TGTAAATA	contains similarity to Pfam domain PF00571 CBS domain pair contains similarity to Interpro domain IPR000644 (Cystathionine beta-synthase, core)
WBGene00011318	T01C3.1	T01C3.1	100	107	7.54e-05	TGTAAATA	contains similarity to Pfam domain PF00400 WD domain, G-beta repeat contains similarity to Interpro domains IPR001680 (WD40 repeat), IPR015943 (WD40/YVTN repeat-like)
WBGene00011320	T01C3.3	T01C3.3	76	83	7.54e-05	TGTAAATA	contains similarity to Interpro domains IPR001841 (Zinc finger, RING-type), IPR013083 (Zinc finger, RING/FYVE/PHD-type)
WBGene00011326	T01D3.1	T01D3.1	227	234	4.79e-05	TGTATATA	contains similarity to Pfam domain PF00008 (EGF-like domain)
WBGene00011329	T01D3.5	T01D3.5	202	209	2.17e-05	TGTACATA	contains similarity to Pfam domain PF02535 ZIP Zinc transporter contains similarity to Interpro domain IPR003689 (Zinc/iron permease)
WBGene00011332	T01E8.4	T01E8.4	32	39	4.79e-05	TGTATATA	contains similarity to Pfam domains PF00646 (F-box domain) , PF00400 (WD domain, G-beta repeat) contains similarity to Interpro domains IPR001810 (Cyclin-like F-box), IPR001680 (WD40 repeat), IPR015943 (WD40/YVTN repeat-like)
WBGene00011345	T01G9.3	T01G9.3	146	153	7.54e-05	TGTAAATA	contains similarity to Pfam domains PF00560 (Leucine Rich Repeat) (8), PF01463 (Leucine rich repeat C-terminal domain) contains similarity to Interpro domains IPR000483 (Cysteine-rich flanking region, C-terminal), IPR001611 (Leucine-rich repeat), IPR003591 (Leucine-rich repeat, typical subtype)
WBGene00011350	T01H3.4	T01H3.4.1	60	67	7.54e-05	TGTAAATA	contains similarity to Interpro domain IPR016040 (NAD(P)-binding)
			154	161	7.54e-05	TGTAAATA
WBGene00011352	rskn-1	T01H8.1b	62	69	7.54e-05	TGTAAATA	C. elegans RSKN-1 protein; contains similarity to Pfam domains PF00069 (Protein kinase domain) (2), PF00433 (Protein kinase C terminal domain) contains similarity to Interpro domains IPR017441 (Protein kinase ATP binding, conserved site), IPR002290 (Serine/threonine protein kinase), IPR008271 (Serine/threonine protein kinase, active site), IPR000719 (Protein kinase, core), IPR001245 (Tyrosine pro…
			112	119	7.54e-05	TGTAAATA
			118	125	7.54e-05	TGTAAATA
WBGene00011365	T02C1.1	T02C1.1	18	25	7.54e-05	TGTAAATA	contains similarity to Pfam domain PF00097 Zinc finger, C3HC4 type (RING finger) contains similarity to Interpro domains IPR001841 (Zinc finger, RING-type), IPR013083 (Zinc finger, RING/FYVE/PHD-type)
WBGene00004061	pmp-4	T02D1.5	38	45	4.79e-05	TGTATATA	C. elegans PMP-4 protein; contains similarity to Pfam domains PF06472 (ABC transporter transmembrane region 2) , PF00005 (ABC transporter) contains similarity to Interpro domains IPR003439 (ABC transporter-like), IPR011527 (ABC transporter, transmembrane region, type 1), IPR010509 (ABC transporter, N-terminal), IPR003593 (AAA+ ATPase, core)
WBGene00020170	T02G5.14	T02G5.14	141	148	2.17e-05	TGTACATA	T02G5.14 is affected by several genes including daf-16, daf-12, and clk-1 based on microarray and RNA-seq studies; is affected by 1-methylnicotinamide and Rotenone based on RNA-seq studies; is predicted to encode a protein with the following domain: F-box associated domain, type 2.
WBGene00000776	cpl-1	T03E6.7.1	152	159	2.17e-05	TGTACATA	C. elegans CPL-1 protein; contains similarity to Pfam domains PF08246 (Cathepsin propeptide inhibitor domain (I29)) , PF00112 (Papain family cysteine protease) contains similarity to Interpro domains IPR013128 (Peptidase C1A, papain), IPR000169 (Peptidase, cysteine peptidase active site), IPR013201 (Proteinase inhibitor I29, cathepsin propeptide), IPR000668 (Peptidase C1A, papain C-terminal)
WBGene00020193	T03F1.12	T03F1.12	99	106	7.54e-05	TGTAAATA	contains similarity to Interpro domain IPR016973 (SYS1 homologue)
WBGene00001832	hcp-4	T03F1.9	60	67	7.54e-05	TGTAAATA	C. elegans HCP-4 protein ; contains similarity to Vanderwaltozyma polyspora Putative uncharacterized protein.; TR:A7TJN8
WBGene00011400	T03F6.4	T03F6.4	64	71	4.79e-05	TGTATATA	contains similarity to Pfam domain PF00646 F-box domain contains similarity to Interpro domain IPR001810 (Cyclin-like F-box)
WBGene00011404	T03F7.7	T03F7.7a	67	74	7.54e-05	TGTAAATA	contains similarity to Pfam domain PF00650 CRAL/TRIO domain contains similarity to Interpro domain IPR001251 (Cellular retinaldehyde-binding/triple function, C-terminal)
WBGene00020197	T03G11.4	T03G11.4	242	249	7.54e-05	TGTAAATA	contains similarity to Pfam domain PF01532 Glycosyl hydrolase family 47 contains similarity to Interpro domain IPR001382 (Glycoside hydrolase, family 47)
WBGene00001865	him-6	T04A11.6	47	54	7.54e-05	TGTAAATA	him-6 is an ortholog of human BLM (BLM RecQ like helicase); exhibits 3'-5' DNA helicase activity, DNA-dependent ATPase activity, and enzyme binding activity; is involved in several processes, including DNA damage checkpoint, DNA metabolic process, and chromosome organization; is used to study Bloom syndrome; human orthologs of this gene are implicated in Bloom syndrome
WBGene00020200	T04A6.1	T04A6.1a	8	15	7.54e-05	TGTAAATA	T04A6.1 is expressed in the anal depressor muscle, the anal sphincter muscle, the body wall musculature, and the reproductive system; is predicted to encode a protein with the following domain
WBGene00001487	frk-1	T04B2.2	20	27	9.83e-05	TGTACAAA	C. elegans FRK-1 protein; contains similarity to Pfam domains PF07714 (Protein tyrosine kinase) , PF00017 (SH2 domain) contains similarity to Interpro domains IPR017441 (Protein kinase ATP binding, conserved site), IPR002290 (Serine/threonine protein kinase), IPR000719 (Protein kinase, core), IPR001245 (Tyrosine protein kinase), IPR000980 (SH2 motif), IPR008266 (Tyrosine protein kinase, active si…
WBGene00011433	pde-1	T04D3.3	151	158	7.54e-05	TGTAAATA	pde-1 is an ortholog of human PDE1A (phosphodiesterase 1A), PDE1B (phosphodiesterase 1B), and PDE1C (phosphodiesterase 1C); exhibits 3',5'-cyclic-AMP phosphodiesterase activity, 3',5'-cyclic-GMP phosphodiesterase activity, and calmodulin binding activity; is involved in several processes, including chemosensory behavior, chemotaxis, and negative regulation of intracellular signal transduction; is…
WBGene00011434	T04D3.5	T04D3.5.1	51	58	9.83e-05	TGTACAAA	T04D3.5 is expressed in the germ line.
			51	58	9.83e-05	TGTACAAA
WBGene00004862	sma-9	T05A10.1d	429	436	7.54e-05	TGTAAATA	C. elegans SMA-9 protein; contains similarity to Pfam domain PF00096 Zinc finger, C2H2 type contains similarity to Interpro domains IPR003604 (Zinc finger, U1-type), IPR015880 (Zinc finger, C2H2-like), IPR013087 (Zinc finger, C2H2-type/integrase, DNA-binding), IPR007087 (Zinc finger, C2H2-type)
WBGene00020224	T05A7.7	T05A7.7	43	50	7.54e-05	TGTAAATA	contains similarity to Acanthoscurria gomesiana RecName: Full=Acanthoscurrin-2;sFlags: Precursor; Fragment;; SW:Q8I6R7
WBGene00003647	nhr-57	T05B4.2	47	54	7.54e-05	TGTAAATA	C. elegans NHR-57 protein; contains similarity to Pfam domains PF00104 (Ligand-binding domain of nuclear hormone receptor) , PF00105 (Zinc finger, C4 type (two domains)) contains similarity to Interpro domains IPR008946 (Nuclear hormone receptor, ligand-binding), IPR013088 (Zinc finger, NHR/GATA-type), IPR001628 (Zinc finger, nuclear hormone receptor-type), IPR000536 (Nuclear hormone receptor, li…
WBGene00020259	T05E7.3	T05E7.3	87	94	2.17e-05	TGTACATA	contains similarity to Interpro domain IPR000463 (Cytosolic fatty-acid binding)
WBGene00020260	T05E7.4	T05E7.4	100	107	7.54e-05	TGTAAATA	T05E7.4 is enriched in the muscle cell and the nervous system based on tiling array, RNA-seq, and microarray studies; is affected by several genes including daf-16, daf-2, and glp-1 based on microarray and RNA-seq studies; is affected by seven chemicals including methylmercuric chloride, Mercuric Chloride, and 4-bromodiphenyl ether based on microarray and RNA-seq studies.
WBGene00011501	rmd-1	T05G5.7	87	94	7.54e-05	TGTAAATA	C. elegans RMD-1 protein; contains similarity to Interpro domain IPR011990 (Tetratricopeptide-like helical)
WBGene00000110	alh-4	T05H4.13a	67	74	7.54e-05	TGTAAATA	C. elegans ALH-4 protein; contains similarity to Pfam domain PF00171 Aldehyde dehydrogenase family contains similarity to Interpro domains IPR016163 (Aldehyde dehydrogenase, C-terminal), IPR016162 (Aldehyde dehydrogenase, N-terminal), IPR012394 (Aldehyde dehydrogenase NAD(P)-dependent), IPR015590 (Aldehyde dehydrogenase)
			405	412	7.54e-05	TGTAAATA
WBGene00020276	T05H4.15	T05H4.15b.1	189	196	2.17e-05	TGTACATA	T05H4.15 is enriched in the amphid sheath cell and the coelomocyte based on tiling array and RNA-seq studies; is affected by several genes including daf-16, daf-2, and age-1 based on microarray and RNA-seq studies; is affected by Cry5B, Colistin, and Sirolimus based on microarray studies; is predicted to encode a protein with the following domain: F-box associated domain, type 2.
			242	249	2.17e-05	TGTACATA
			189	196	2.17e-05	TGTACATA
WBGene00020283	T06A4.3	T06A4.3a	29	36	2.17e-05	TGTACATA	contains similarity to Pfam domains PF00246 (Zinc carboxypeptidase) , PF01549 (ShK domain-like) , PF02244 (Carboxypeptidase activation peptide) contains similarity to Interpro domains IPR003146 (Proteinase inhibitor, carboxypeptidase propeptide), IPR000834 (Peptidase M14, carboxypeptidase A), IPR003582 (Metridin-like ShK toxin)
WBGene00011530	T06D8.10	T06D8.10	59	66	2.17e-05	TGTACATA	contains similarity to Pfam domain PF03098 Animal haem peroxidase contains similarity to Interpro domain IPR002007 (Haem peroxidase, animal)
WBGene00011524	T06D8.3	T06D8.3	185	192	4.79e-05	TGTATATA	contains similarity to Pfam domain PF01569 PAP2 superfamily contains similarity to Interpro domain IPR000326 (Phosphatidic acid phosphatase type 2/haloperoxidase)
WBGene00011536	T06E4.9	T06E4.9	48	55	4.79e-05	TGTATATA	contains similarity to Drosophila melanogaster Flybase gene name is CG2962-PA;; FLYBASE:CG2962
WBGene00011543	acl-1	T06E8.1	48	55	7.54e-05	TGTAAATA	acl-2 is an ortholog of human AGPAT2 (1-acylglycerol-3-phosphate O-acyltransferase 2); is predicted to have 1-acylglycerol-3-phosphate O-acyltransferase activity; is expressed in the body wall musculature, the intestine, and the pharynx; human orthologs of this gene are implicated in congenital generalized lipodystrophy type 1
WBGene00006802	unc-69	T07A5.6b	14	21	7.54e-05	TGTAAATA	C. elegans UNC-69 protein ; contains similarity to Brugia malayi RecName: Full=Short coiled-coil protein homolog;; SW:A8NJZ7
WBGene00020300	tag-261	T07A9.13a	30	37	7.54e-05	TGTAAATA	C. elegans TAG-261 protein ; contains similarity to Chlamydomonas reinhardtii RecName: Full=13 kDa deflagellation-inducible protein;; SW:Q9XF62
			30	37	7.54e-05	TGTAAATA
WBGene00001338	ers-3	T07A9.2	33	40	7.54e-05	TGTAAATA	C. elegans ERS-3 protein; contains similarity to Pfam domain PF00749 tRNA synthetases class I (E and Q), catalytic domain contains similarity to Interpro domains IPR004527 (Glutamyl-tRNA synthetase, class Ic, bacterial/mitochondrial), IPR000924 (Glutamyl/glutaminyl-tRNA synthetase, class Ic), IPR001412 (Aminoacyl-tRNA synthetase, class I, conserved site), IPR008925 (Aminoacyl-tRNA synthetase, cla…
WBGene00011563	T07C4.11	T07C4.11	458	465	4.79e-05	TGTATATA	contains similarity to Pfam domain PF02373 JmjC domain contains similarity to Interpro domains IPR013129 (Transcription factor jumonji), IPR003347 (Transcription factor jumonji/aspartyl beta-hydroxylase)
WBGene00000423	ced-9	T07C4.8.1	14	21	7.54e-05	TGTAAATA	ced-9 is an ortholog of human BCL2A1, BCL2, and BCL2L2-PABPN1; exhibits GTPase activator activity; is involved in several processes, including actin filament depolymerization, apoptotic process involved in development, and positive regulation of cellular component organization; localizes to several cellular components, including the cytoplasmic part, neuronal cell body, and presynapse; is express…
WBGene00020301	T07D1.2	T07D1.2.1	140	147	7.54e-05	TGTAAATA	contains similarity to Brugia malayi Putative uncharacterized protein.; TR:A8NSK9
			140	147	7.54e-05	TGTAAATA
WBGene00000288	cal-4	T07G12.1	76	83	9.83e-05	TGTACAAA	C. elegans CAL-4 protein; contains similarity to Pfam domain PF00036 EF hand contains similarity to Interpro domains IPR001125 (Recoverin), IPR011992 (EF-Hand type), IPR002048 (Calcium-binding EF-hand)
WBGene00001867	him-8	T07G12.12	30	37	7.54e-05	TGTAAATA	C. elegans HIM-8 protein; contains similarity to Interpro domain IPR007087 (Zinc finger, C2H2-type)
WBGene00011596	T07G12.5	T07G12.5	7	14	4.79e-05	TGTATATA	T07G12.5 is an ortholog of human SLC23A1 (solute carrier family 23 member 1), SLC23A2 (solute carrier family 23 member 2), and SLC23A3 (solute carrier family 23 member 3); is predicted to have transmembrane transporter activity
WBGene00006476	rhgf-2	T08H4.1	43	50	4.79e-05	TGTATATA	C. elegans RHGF-2 protein; contains similarity to Pfam domain PF00621 RhoGEF domain contains similarity to Interpro domains IPR000219 (Dbl homology (DH) domain), IPR001849 (Pleckstrin-like), IPR011993 (Pleckstrin homology-type), IPR015721 (Rho GTP exchange factor)
WBGene00011639	ztf-17	T09A5.12.1	446	453	7.54e-05	TGTAAATA	C. elegans ZTF-17 protein; contains similarity to Interpro domain IPR015880 (Zinc finger, C2H2-like)
WBGene00000500	chn-1	T09B4.10.1	282	289	7.54e-05	TGTAAATA	C. elegans CHN-1 protein; contains similarity to Pfam domains PF00515 (Tetratricopeptide repeat) (3), PF04564 (U-box domain) contains similarity to Interpro domains IPR011990 (Tetratricopeptide-like helical), IPR003613 (U box), IPR013083 (Zinc finger, RING/FYVE/PHD-type), IPR001440 (Tetratricopeptide TPR-1), IPR013026 (Tetratricopeptide region)
WBGene00020421	T10E10.4	T10E10.4	32	39	4.79e-05	TGTATATA	contains similarity to Pfam domain PF01683 EB module contains similarity to Interpro domains IPR003571 (Snake toxin), IPR006150 (Cysteine-rich repeat), IPR006149 (Nematode-specific EB region)
WBGene00004740	scd-2	T10H9.2	196	203	4.79e-05	TGTATATA	C. elegans SCD-2 protein; contains similarity to Pfam domain PF07714 Protein tyrosine kinase contains similarity to Interpro domains IPR017441 (Protein kinase ATP binding, conserved site), IPR002290 (Serine/threonine protein kinase), IPR000719 (Protein kinase, core), IPR002172 (Low density lipoprotein-receptor, class A, cysteine-rich), IPR000998 (MAM), IPR001245 (Tyrosine protein kinase), IPR0082…
WBGene00011717	T11G6.2	T11G6.2a	216	223	4.79e-05	TGTATATA	contains similarity to Pfam domain PF07690 Major Facilitator Superfamily contains similarity to Interpro domains IPR007114 (Major facilitator superfamily), IPR011701 (Major facilitator superfamily MFS-1)
WBGene00011727	T12A7.6	T12A7.6	27	34	4.79e-05	TGTATATA	contains similarity to Brugia malayi Putative uncharacterized protein.; TR:A8NSE0
WBGene00011731	acbp-5	T12D8.3	29	36	7.54e-05	TGTAAATA	C. elegans ACBP-5 protein; contains similarity to Pfam domains PF00023 (Ankyrin repeat) (2), PF00887 (Acyl CoA binding protein) contains similarity to Interpro domains IPR014352 (FERM/acyl-CoA-binding protein, 3-helical bundle), IPR002110 (Ankyrin), IPR000582 (Acyl-CoA-binding protein, ACBP)
WBGene00011734	T12D8.6	T12D8.6.1	22	29	7.54e-05	TGTAAATA	contains similarity to Pfam domain PF00036 EF hand contains similarity to Interpro domains IPR011992 (EF-Hand type), IPR002048 (Calcium-binding EF-hand)
			22	29	7.54e-05	TGTAAATA
WBGene00011746	T13F2.6	T13F2.6	182	189	2.17e-05	TGTACATA	T13F2.6 is enriched in the Z1.p, the Z4.a, and the reproductive system based on tiling array and RNA-seq studies; is affected by several genes including dpy-10, hsf-1, and sir-2.1 based on microarray and RNA-seq studies; is affected by thirteen chemicals including manganese chloride, D-glucose, and stavudine based on RNA-seq and microarray studies.
WBGene00011757	T13H5.3	T13H5.3	25	32	4.79e-05	TGTATATA	contains similarity to Pfam domain PF00704 Glycosyl hydrolases family 18 contains similarity to Interpro domains IPR011583 (Chitinase II), IPR001223 (Glycoside hydrolase, family 18, catalytic domain), IPR013781 (Glycoside hydrolase, subgroup, catalytic core), IPR001579 (Glycoside hydrolase, chitinase active site), IPR001002 (Chitin-binding, type 1)
WBGene00011768	oac-46	T14D7.2	305	312	7.54e-05	TGTAAATA	C. elegans OAC-46 protein; contains similarity to Pfam domain PF01757 Acyltransferase family contains similarity to Interpro domain IPR002656 (Acyltransferase 3)
WBGene00004091	pps-1	T14G10.1	53	60	4.79e-05	TGTATATA	C. elegans PPS-1 protein; contains similarity to Pfam domains PF01747 (ATP-sulfurylase) , PF01583 (Adenylylsulphate kinase) contains similarity to Interpro domains IPR002891 (Adenylylsulphate kinase, C-terminal), IPR002650 (ATP-sulphurylase), IPR014729 (Rossmann-like alpha/beta/alpha sandwich fold)
WBGene00004023	pho-4	T16D1.2	32	39	7.54e-05	TGTAAATA	C. elegans PHO-4 protein; contains similarity to Pfam domain PF00328 Histidine acid phosphatase contains similarity to Interpro domain IPR000560 (Histidine acid phosphatase)
WBGene00020549	nmt-1	T17E9.2b	270	277	4.79e-05	TGTATATA	C. elegans NMT-1 protein; contains similarity to Pfam domains PF02799 (Myristoyl-CoA:protein N-myristoyltransferase, C-terminal domain) , PF01233 (Myristoyl-CoA:protein N-myristoyltransferase, N-terminal domain) contains similarity to Interpro domains IPR000903 (Myristoyl-CoA:protein N-myristoyltransferase), IPR016181 (Acyl-CoA N-acyltransferase)
WBGene00020551	T17H7.7	T17H7.7	81	88	4.79e-05	TGTATATA	contains similarity to Saccharomyces cerevisiae Putative protein of unknown function; green fluorescent protein (GFP)-fusion protein localizes to the cytoplasm; specifically phosphorylated in vitro by mammalian diphosphoinositol pentakisphosphate (IP7); SGD:YGR130C
WBGene00003514	myo-2	T18D3.4	312	319	7.54e-05	TGTAAATA	C. elegans MYO-2 protein; contains similarity to Pfam domains PF01576 (Myosin tail) , PF02736 (Myosin N-terminal SH3-like domain) , PF00063 (Myosin head (motor domain)) contains similarity to Interpro domains IPR000209 (Peptidase S8 and S53, subtilisin, kexin, sedolisin), IPR004009 (Myosin, N-terminal, SH3-like), IPR002928 (Myosin tail), IPR001609 (Myosin head, motor region)
WBGene00011824	T18D3.7	T18D3.7.1	151	158	7.54e-05	TGTAAATA	contains similarity to Pfam domain PF01166 TSC-22/dip/bun family contains similarity to Interpro domain IPR000580 (TSC-22 / Dip / Bun)
WBGene00001695	grd-6	T18H9.1	45	52	7.54e-05	TGTAAATA	C. elegans GRD-6 protein; contains similarity to Pfam domain PF04155 Ground-like domain contains similarity to Interpro domains IPR004829 (Cell surface antigen), IPR007284 (Ground-like region)
WBGene00011827	T19A6.1	T19A6.1b	626	633	7.54e-05	TGTAAATA	contains similarity to Pfam domain PF04193 PQ loop repeat contains similarity to Interpro domain IPR006603 (Cystinosin/ERS1p repeat)
WBGene00011835	T19B10.8	T19B10.8	298	305	4.79e-05	TGTATATA	contains similarity to Pfam domain PF07819 PGAP1-like protein contains similarity to Interpro domain IPR012908 (PGAP1-like)
WBGene00006776	unc-40	T19B4.7	140	147	9.83e-05	TGTACAAA	C. elegans UNC-40 protein; contains similarity to Pfam domains PF00041 (Fibronectin type III domain) (6), PF07679 (Immunoglobulin I-set domain) (4)contains similarity to Interpro domains IPR003598 (Immunoglobulin subtype 2), IPR008957 (Fibronectin, type III-like fold), IPR003961 (Fibronectin, type III), IPR013098 (Immunoglobulin I-set), IPR013783 (Immunoglobulin-like fold), IPR007110 (Immunoglobu…
WBGene00020562	T19C3.4	T19C3.4	433	440	7.54e-05	TGTAAATA	contains similarity to Pfam domain PF03134 TB2/DP1, HVA22 family contains similarity to Interpro domain IPR004345 (TB2/DP1 and HVA22 related protein)
WBGene00020563	T19C3.5	T19C3.5	48	55	7.54e-05	TGTAAATA	contains similarity to Pfam domains PF02886 (LBP / BPI / CETP family, C-terminal domain) , PF01273 (LBP / BPI / CETP family, N-terminal domain) contains similarity to Interpro domain IPR001124 (Lipid-binding serum glycoprotein)
WBGene00020577	T19D12.2	T19D12.2b	55	62	9.83e-05	TGTACAAA	T19D12.2 is enriched in the ASER, the OLL, the PLM, the PVD, and the intestine based on tiling array and RNA-seq studies; is affected by several genes including daf-16, daf-2, and glp-1 based on microarray and RNA-seq studies; is affected by nine chemicals including Rotenone, levamisole, and stavudine based on RNA-seq and microarray studies; is predicted to encode a protein with the following dom…
WBGene00020586	T19F4.1	T19F4.1b	200	207	4.79e-05	TGTATATA	contains similarity to Pfam domain PF00001 7 transmembrane receptor (rhodopsin family) contains similarity to Interpro domains IPR017452 (GPCR, rhodopsin-like superfamily), IPR000276 (GPCR, rhodopsin-like)
WBGene00011858	T20D3.5	T20D3.5b	247	254	7.54e-05	TGTAAATA	contains similarity to Pfam domain PF00153 Mitochondrial carrier protein contains similarity to Interpro domain IPR001993 (Mitochondrial substrate carrier)
WBGene00011864	T20F10.2	T20F10.2a	169	176	9.83e-05	TGTACAAA	contains similarity to Dictyostelium discoideum RecName: Full=Putative leucine-rich repeat-containing protein DDB0188916;; SW:Q54G05
WBGene00020632	T20F7.5	T20F7.5	88	95	7.54e-05	TGTAAATA	contains similarity to Homo sapiens Similar to Dentin sialophosphoprotein preproprotein; ENSEMBL:ENSP00000282478
WBGene00011883	T21B10.1	T21B10.1	91	98	7.54e-05	TGTAAATA	contains similarity to Brugia malayi RE06140p, putative.; TR:A8P498
WBGene00011879	T21B6.2	T21B6.2	9	16	2.17e-05	TGTACATA	contains similarity to Pfam domain PF00328 Histidine acid phosphatase contains similarity to Interpro domain IPR000560 (Histidine acid phosphatase)
WBGene00020651	T21D12.12	T21D12.12	31	38	4.79e-05	TGTATATA	contains similarity to Pfam domain PF00014 Kunitz/Bovine pancreatic trypsin inhibitor domain contains similarity to Interpro domains IPR002223 (Proteinase inhibitor I2, Kunitz metazoa), IPR006150 (Cysteine-rich repeat)
WBGene00044898	let-383	T21G5.6	70	77	4.79e-05	TGTATATA	let-383 is enriched in the Z1, the Z4, the germline precursor cell, the hypodermis, and the intestine based on tiling array and RNA-seq studies; is affected by several genes including daf-16, daf-12, and pgl-1 based on RNA-seq and microarray studies; is affected by Rotenone, Zidovudine, and Colistin based on RNA-seq and microarray studies.
WBGene00020674	T22B7.7	T22B7.7	108	115	4.79e-05	TGTATATA	contains similarity to Homo sapiens CGI16-iso; ENSEMBL:ENSP00000368599
WBGene00011917	T22C1.6	T22C1.6	56	63	4.79e-05	TGTATATA	contains similarity to Homo sapiens Alpha-taxilin; ENSEMBL:ENSP00000362711
WBGene00006875	vab-9	T22C8.8	129	136	2.17e-05	TGTACATA	C. elegans VAB-9 protein; contains similarity to Interpro domain IPR015664 (P53-induced protein)
WBGene00020693	T22E7.1	T22E7.1b	181	188	9.83e-05	TGTACAAA	contains similarity to Pfam domains PF00560 (Leucine Rich Repeat) (3), PF01463 (Leucine rich repeat C-terminal domain) contains similarity to Interpro domain IPR000483 (Cysteine-rich flanking region, C-terminal)
WBGene00020700	T22F3.11	T22F3.11a	80	87	7.54e-05	TGTAAATA	contains similarity to Pfam domain PF07690 Major Facilitator Superfamily contains similarity to Interpro domains IPR007114 (Major facilitator superfamily), IPR011701 (Major facilitator superfamily MFS-1)
WBGene00006379	sys-1	T23D8.9a	90	97	2.17e-05	TGTACATA	C. elegans SYS-1 protein; contains similarity to Interpro domain IPR011989 (Armadillo-like helical)
WBGene00011953	ppm-2	T23F11.1.1	34	41	7.54e-05	TGTAAATA	ppm-2 exhibits ubiquitin protein ligase binding activity; is involved in negative regulation of axon extension and positive regulation of synapse assembly; localizes to the presynaptic active zone; is expressed in mechanosensory neurons, motor neurons, nerve ring neurons, the muscle cell, and the pharynx
WBGene00011953	T23F11.1	T23F11.1.1	337	344	2.17e-05	TGTACATA	contains similarity to Pfam domain PF00481 Protein phosphatase 2C contains similarity to Interpro domains IPR001932 (Protein phosphatase 2C-related), IPR000222 (), IPR014045 (Protein phosphatase 2C, N-terminal), IPR015655 (Protein phosphatase 2C)
WBGene00003476	mtm-3	T24A11.1a	347	354	9.83e-05	TGTACAAA	C. elegans MTM-3 protein; contains similarity to Pfam domains PF06602 (Myotubularin-related) , PF01363 (FYVE zinc finger) contains similarity to Interpro domains IPR003595 (Protein-tyrosine phosphatase, catalytic), IPR010569 (Myotubularin-related), IPR016130 (Protein-tyrosine phosphatase, active site), IPR000306 (Zinc finger, FYVE-type), IPR013083 (Zinc finger, RING/FYVE/PHD-type), IPR017455 (Zin…
			549	556	2.17e-05	TGTACATA
			559	566	9.83e-05	TGTACAAA
WBGene00011978	T24B8.4	T24B8.4	73	80	7.54e-05	TGTAAATA	contains similarity to Pfam domain PF02205 WH2 motif contains similarity to Interpro domain IPR003124 (Actin-binding WH2)
WBGene00004301	ram-5	T24C2.1	83	90	4.79e-05	TGTATATA	C. elegans RAM-5 protein; contains similarity to Pfam domain PF00100 Zona pellucida-like domain contains similarity to Interpro domains IPR010916 (TonB box, conserved site), IPR001507 (Endoglin/CD105 antigen)
WBGene00003740	nlp-2	T24D8.5	69	76	9.83e-05	TGTACAAA	C. elegans NLP-2 protein ;
WBGene00020784	tat-4	T24H7.5a	32	39	9.83e-05	TGTACAAA	C. elegans TAT-4 protein; contains similarity to Pfam domain PF00702 haloacid dehalogenase-like hydrolase contains similarity to Interpro domains IPR006539 (Phospholipid-translocating P-type ATPase, flippase), IPR001757 (ATPase, P-type, K/Mg/Cd/Cu/Zn/Na/Ca/Na/H-transporter), IPR001680 (WD40 repeat), IPR005834 (Haloacid dehalogenase-like hydrolase)
WBGene00020803	T25E4.1	T25E4.1	62	69	9.83e-05	TGTACAAA	contains similarity to Rhodococcus sp RecName: Full=Translation initiation factor IF-2;; SW:Q0S219
WBGene00020806	T25F10.3	T25F10.3.1	13	20	4.79e-05	TGTATATA	contains similarity to Pfam domain PF07974 EGF-like domain contains similarity to Interpro domains IPR000742 (EGF-like, type 3), IPR013032 (EGF-like region, conserved site), IPR013111 (EGF, extracellular)
WBGene00000244	bbs-8	T25F10.5	30	37	2.17e-05	TGTACATA	C. elegans BBS-8 protein; contains similarity to Pfam domains PF07719 (Tetratricopeptide repeat) , PF00515 (Tetratricopeptide repeat) (3)contains similarity to Interpro domains IPR011990 (Tetratricopeptide-like helical), IPR000209 (Peptidase S8 and S53, subtilisin, kexin, sedolisin), IPR008940 (Protein prenyltransferase), IPR001440 (Tetratricopeptide TPR-1), IPR013105 (Tetratricopeptide TPR2), IP…
WBGene00020812	acdh-7	T25G12.5.1	36	43	9.83e-05	TGTACAAA	C. elegans ACDH-7 protein; contains similarity to Pfam domains PF02770 (Acyl-CoA dehydrogenase, middle domain) , PF00441 (Acyl-CoA dehydrogenase, C-terminal domain) , PF02771 (Acyl-CoA dehydrogenase, N-terminal domain) contains similarity to Interpro domains IPR006090 (Acyl-CoA oxidase/dehydrogenase, type 1), IPR013786 (Acyl-CoA dehydrogenase/oxidase, N-terminal), IPR006091 (Acyl-CoA dehydrogenas…
WBGene00003106	mab-9	T27A1.6	24	31	7.54e-05	TGTAAATA	C. elegans MAB-9 protein; contains similarity to Pfam domain PF00907 T-box contains similarity to Interpro domain IPR001699 (Transcription factor, T-box)
WBGene00020852	nhr-228	T27B7.6a	44	51	4.79e-05	TGTATATA	C. elegans NHR-228 protein; contains similarity to Pfam domains PF00104 (Ligand-binding domain of nuclear hormone receptor) , PF00105 (Zinc finger, C4 type (two domains)) contains similarity to Interpro domains IPR008946 (Nuclear hormone receptor, ligand-binding), IPR013088 (Zinc finger, NHR/GATA-type), IPR001628 (Zinc finger, nuclear hormone receptor-type), IPR000536 (Nuclear hormone receptor, l…
WBGene00012085	T27D12.1	T27D12.1.1	27	34	9.83e-05	TGTACAAA	contains similarity to Pfam domain PF07690 Major Facilitator Superfamily contains similarity to Interpro domains IPR007114 (Major facilitator superfamily), IPR011701 (Major facilitator superfamily MFS-1)
			27	34	9.83e-05	TGTACAAA
WBGene00000528	clh-1	T27D12.2b	256	263	4.79e-05	TGTATATA	C. elegans CLH-1 protein; contains similarity to Pfam domains PF00571 (CBS domain pair) , PF00654 (Voltage gated chloride channel) contains similarity to Interpro domains IPR014743 (Chloride channel, core), IPR000644 (Cystathionine beta-synthase, core), IPR001807 (Chloride channel, voltage gated)
WBGene00002185	kel-3	T27E9.4a.1	14	21	7.54e-05	TGTAAATA	C. elegans KEL-3 protein; contains similarity to Pfam domains PF01344 (Kelch motif) (6), PF00651 (BTB/POZ domain) , PF07707 (BTB And C-terminal Kelch) contains similarity to Interpro domains IPR017096 (Kelch-like protein, gigaxonin), IPR000210 (BTB/POZ-like), IPR006652 (Kelch repeat type 1), IPR011333 (BTB/POZ fold), IPR015916 (Galactose oxidase, beta-propeller), IPR013069 (BTB/POZ), IPR011705 (B…
WBGene00012107	T27F6.8	T27F6.8	117	124	2.17e-05	TGTACATA	contains similarity to Pfam domain PF00646 F-box domain contains similarity to Interpro domain IPR001810 (Cyclin-like F-box)
WBGene00012117	T28B11.1	T28B11.1.1	34	41	4.79e-05	TGTATATA	contains similarity to Pfam domain PF00646 F-box domain contains similarity to Interpro domain IPR001810 (Cyclin-like F-box)
			47	54	7.54e-05	TGTAAATA
WBGene00012123	T28D6.3	T28D6.3	34	41	2.17e-05	TGTACATA	contains similarity to Arabidopsis thaliana Hypothetical protein LCR14 precursor.; TR:P82729
WBGene00012136	T28F4.1	T28F4.1.1	341	348	7.54e-05	TGTAAATA	contains similarity to Lactococcus lactis Probable DNA-directed RNA polymerase delta subunit (RNAP deltasfactor).; SW:RPOE_LACLA
WBGene00012140	T28F4.5	T28F4.5.1	190	197	4.79e-05	TGTATATA	contains similarity to Homo sapiens Death-associated protein 1; ENSEMBL:ENSP00000230895
WBGene00020910	W01A11.2	W01A11.2	71	78	7.54e-05	TGTAAATA	contains similarity to Pfam domain PF03982 Diacylglycerol acyltransferase contains similarity to Interpro domain IPR007130 (Diacylglycerol acyltransferase)
WBGene00006815	unc-83	W01A11.3a	363	370	4.79e-05	TGTATATA	C. elegans UNC-83 protein ; contains similarity to Staphylococcus saprophyticus subsp saprophyticus RecName: Full=Uro-adherence factor A;sFlags: Precursor;; SW:Q4A0V8
			363	370	4.79e-05	TGTATATA
			363	370	4.79e-05	TGTATATA
WBGene00020912	W01A11.7	W01A11.7.1	94	101	4.79e-05	TGTATATA	W01A11.7 is enriched in dopaminergic neurons, the AFD, the excretory cell, and the ventral nerve cord based on tiling array and RNA-seq studies; is affected by several genes including daf-16, daf-2, and let-60 based on microarray, RNA-seq, and tiling array studies; is affected by six chemicals including Lithium Chloride, aldicarb, and Sodium Chloride based on microarray and RNA-seq studies.
WBGene00007024	mdt-28	W01A8.1b.2	528	535	7.54e-05	TGTAAATA	C. elegans MDT-28 protein ; contains similarity to Brugia malayi Putative uncharacterized protein.; TR:A8NHK6
WBGene00020919	set-19	W01C8.3	1068	1075	9.83e-05	TGTACAAA	C. elegans SET-19 protein; contains similarity to Pfam domain PF00856 SET domain contains similarity to Interpro domain IPR001214 (SET)
WBGene00004155	pqn-73	W01C9.3	129	136	9.83e-05	TGTACAAA	C. elegans PQN-73 protein ; contains similarity to Brugia malayi Putative uncharacterized protein.; TR:A8QDU9
WBGene00000901	daf-5	W01G7.1	110	117	2.17e-05	TGTACATA	C. elegans DAF-5 protein; contains similarity to Interpro domain IPR010919 (SAND-like)
			67	74	9.83e-05	TGTACAAA
WBGene00004156	pqn-74	W02A2.3	64	71	4.79e-05	TGTATATA	C. elegans PQN-74 protein; contains similarity to Pfam domain PF01607 Chitin binding Peritrophin-A domain contains similarity to Interpro domain IPR002557 (Chitin binding protein, peritrophin-A)
WBGene00003230	mex-5	W02A2.7	45	52	2.17e-05	TGTACATA	C. elegans MEX-5 protein; contains similarity to Pfam domain PF00642 Zinc finger C-x8-C-x5-C-x3-H type (and similar) contains similarity to Interpro domain IPR000571 (Zinc finger, CCCH-type)
WBGene00043534	W02B12.13	W02B12.13	51	58	2.17e-05	TGTACATA	contains similarity to Interpro domain IPR001782 (Flagellar P-ring protein)
WBGene00001980	hmr-1	W02B9.1b.1	178	185	4.79e-05	TGTATATA	hmr-1 exhibits beta-catenin binding activity and delta-catenin binding activity; is involved in several processes, including cortical actin cytoskeleton organization, cytoskeletal anchoring at plasma membrane, and gastrulation; localizes to the catenin complex, cell-cell adherens junction, and spanning component of plasma membrane; is expressed in the epithelial system, the germline precursor cel…
WBGene00020928	W02C12.1	W02C12.1	197	204	7.54e-05	TGTAAATA	contains similarity to Pfam domains PF00008 (EGF-like domain) (10), PF07699 (GCC2 and GCC3) (4), PF07974 (EGF-like domain) , PF02494 (HYR domain) contains similarity to Interpro domains IPR001438 (EGF-like, type 2), IPR000742 (EGF-like, type 3), IPR013320 (Concanavalin A-like lectin/glucanase, subgroup), IPR003410 (Hyalin), IPR001759 (Pentaxin), IPR000436 (Sushi/SCR/CCP), IPR006209 (EGF-like), IP…
WBGene00020930	hlh-30	W02C12.3d.1	27	34	2.17e-05	TGTACATA	C. elegans HLH-30 protein; contains similarity to Pfam domain PF00010 Helix-loop-helix DNA-binding domain contains similarity to Interpro domains IPR001092 (Basic helix-loop-helix dimerisation region bHLH), IPR011598 (Helix-loop-helix DNA-binding)
			866	873	2.17e-05	TGTACATA
			275	282	2.17e-05	TGTACATA
			1114	1121	2.17e-05	TGTACATA
WBGene00012220	W03C9.2	W03C9.2	32	39	7.54e-05	TGTAAATA	contains similarity to Schizosaccharomyces pombe Transcription elongation factor S-II (TFIIS).; SW:TFS2_SCHPO
WBGene00020995	W03F8.6	W03F8.6a.1	38	45	4.79e-05	TGTATATA	W03F8.6 is expressed in the pharynx.
			38	45	4.79e-05	TGTATATA
			34	41	4.79e-05	TGTATATA
WBGene00000228	atn-1	W04D2.1a	178	185	4.79e-05	TGTATATA	C. elegans ATN-1 protein; contains similarity to Pfam domains PF00435 (Spectrin repeat) (4), PF08726 (Ca2+ insensitive EF hand) , PF00307 (Calponin homology (CH) domain) (2)contains similarity to Interpro domains IPR014837 (EF-hand, Ca insensitive), IPR002017 (Spectrin repeat), IPR011992 (EF-Hand type), IPR002048 (Calcium-binding EF-hand), IPR016146 (Calponin-homology), IPR001715 (Calponin-like a…
WBGene00012256	W04G3.2	W04G3.2	221	228	4.79e-05	TGTATATA	contains similarity to Brugia malayi Putative uncharacterized protein.; TR:A8PYG5
WBGene00006609	tre-3	W05E10.4	39	46	7.54e-05	TGTAAATA	C. elegans TRE-3 protein; contains similarity to Pfam domain PF01204 Trehalase contains similarity to Interpro domain IPR001661 (Glycoside hydrolase, family 37)
WBGene00001702	grd-13	W05E7.3	69	76	7.54e-05	TGTAAATA	C. elegans GRD-13 protein ;
WBGene00021035	W05F2.3	W05F2.3	105	112	7.54e-05	TGTAAATA	W05F2.3 is expressed in the germ line.
WBGene00021050	W05H9.3	W05H9.3	851	858	9.83e-05	TGTACAAA	W05H9.3 is enriched in several tissues, including the body wall muscle cell, the coelomocyte, the excretory cell, the hypodermis, and the nervous system based on tiling array and RNA-seq studies; is affected by several genes including daf-16, daf-2, and daf-12 based on microarray, tiling array, and RNA-seq studies; is affected by nine chemicals including 1-methylnicotinamide, D-glucose, and stavu…
WBGene00021060	dct-11	W06B11.3	51	58	2.17e-05	TGTACATA	C. elegans DCT-11 protein ;
WBGene00004859	sma-5	W06B3.2b	135	142	4.79e-05	TGTATATA	C. elegans SMA-5 protein; contains similarity to Pfam domain PF00069 Protein kinase domain contains similarity to Interpro domains IPR017441 (Protein kinase ATP binding, conserved site), IPR002290 (Serine/threonine protein kinase), IPR008271 (Serine/threonine protein kinase, active site), IPR000719 (Protein kinase, core), IPR001245 (Tyrosine protein kinase), IPR017442 (Serine/threonine protein ki…
			196	203	4.79e-05	TGTATATA
WBGene00012300	W06D11.2	W06D11.2	11	18	7.54e-05	TGTAAATA	W06D11.2 is enriched in the BAG based on tiling array studies; is affected by several genes including pmk-1, fbf-1, and nhr-25 based on microarray, tiling array, and RNA-seq studies; is affected by cholesterol based on microarray studies.
WBGene00012306	W06F12.2	W06F12.2b	79	86	4.79e-05	TGTATATA	contains similarity to Brugia malayi Putative uncharacterized protein (Fragment).; TR:A8PCH9
			17	24	4.79e-05	TGTATATA
WBGene00021066	W06H8.2	W06H8.2	58	65	7.54e-05	TGTAAATA	contains similarity to Pfam domain PF00724 NADH:flavin oxidoreductase / NADH oxidase family contains similarity to Interpro domains IPR013785 (Aldolase-type TIM barrel), IPR001155 (NADH:flavin oxidoreductase/NADH oxidase, N-terminal)
WBGene00012319	W07A8.2	W07A8.2a	123	130	4.79e-05	TGTATATA	contains similarity to Pfam domains PF01734 (Patatin-like phospholipase) , PF00023 (Ankyrin repeat) (6)contains similarity to Interpro domains IPR002641 (Patatin), IPR002110 (Ankyrin)
WBGene00021071	W07B8.3	W07B8.3	93	100	2.17e-05	TGTACATA	W07B8.3 is enriched in the male, the nervous system, the pharynx, and the sensillum based on tiling array, RNA-seq, and microarray studies; is affected by several genes including daf-2, let-7, and gld-1 based on microarray, tiling array, RNA-seq, and proteomic studies; is affected by eight chemicals including Tunicamycin, stavudine, and Zidovudine based on microarray and RNA-seq studies.
WBGene00012330	zip-3	W07G1.3	90	97	9.83e-05	TGTACAAA	C. elegans ZIP-3 protein; contains similarity to Pfam domain PF07716 Basic region leucine zipper contains similarity to Interpro domains IPR011700 (Basic leucine zipper), IPR004827 (Basic-leucine zipper (bZIP) transcription factor)
WBGene00012340	dct-15	W08D2.3a	28	35	7.54e-05	TGTAAATA	C. elegans DCT-15 protein ; contains similarity to Homo sapiens Major facilitator superfamily domain-containing protein 4; ENSEMBL:ENSP00000356115
WBGene00021085	W08E12.4	W08E12.4	33	40	4.79e-05	TGTATATA	contains similarity to Interpro domain IPR006058 (2Fe-2S ferredoxin, iron-sulphur binding site)
WBGene00012352	dkf-1	W09C5.5	73	80	4.79e-05	TGTATATA	C. elegans DKF-1 protein; contains similarity to Pfam domains PF00069 (Protein kinase domain) , PF00130 (Phorbol esters/diacylglycerol binding domain (C1 domain)) (2)contains similarity to Interpro domains IPR017441 (Protein kinase ATP binding, conserved site), IPR002290 (Serine/threonine protein kinase), IPR008271 (Serine/threonine protein kinase, active site), IPR001849 (Pleckstrin-like), IPR00…
WBGene00001604	gln-3	Y105C5B.28a	82	89	9.83e-05	TGTACAAA	C. elegans GLN-3 protein; contains similarity to Pfam domains PF03951 (Glutamine synthetase, beta-Grasp domain) , PF00120 (Glutamine synthetase, catalytic domain) contains similarity to Interpro domains IPR008147 (Glutamine synthetase, beta-Grasp), IPR014746 (Glutamine synthetase/guanido kinase, catalytic region), IPR008146 (Glutamine synthetase, catalytic region)
WBGene00013672	catp-1	Y105E8A.12a	14	21	4.79e-05	TGTATATA	C. elegans CATP-1 protein; contains similarity to Pfam domains PF00690 (Cation transporter/ATPase, N-terminus) , PF00689 (Cation transporting ATPase, C-terminus) , PF00122 (E1-E2 ATPase) , PF00702 (haloacid dehalogenase-like hydrolase) contains similarity to Interpro domains IPR008250 (E1-E2 ATPase-associated region), IPR006069 (ATPase, P-type cation exchange, alpha subunit), IPR004014 (ATPase, P…
			78	85	4.79e-05	TGTATATA
WBGene00013667	Y105E8A.2	Y105E8A.2	163	170	7.54e-05	TGTAAATA	contains similarity to Pfam domain PF07915 Glucosidase II beta subunit-like protein contains similarity to Interpro domain IPR012913 (Glucosidase II beta subunit-like)
WBGene00001334	ero-1	Y105E8B.8a	152	159	2.17e-05	TGTACATA	C. elegans ERO-1 protein; contains similarity to Pfam domain PF04137 Endoplasmic Reticulum Oxidoreductin 1 (ERO1) contains similarity to Interpro domain IPR007266 (Endoplasmic reticulum oxidoreductin 1)
WBGene00013694	Y106G6A.1	Y106G6A.1	109	116	2.17e-05	TGTACATA	contains similarity to Pfam domain PF00069 Protein kinase domain contains similarity to Interpro domains IPR002290 (Serine/threonine protein kinase), IPR008271 (Serine/threonine protein kinase, active site), IPR000719 (Protein kinase, core), IPR001245 (Tyrosine protein kinase), IPR017442 (Serine/threonine protein kinase-related)
WBGene00013704	Y106G6D.8	Y106G6D.8.1	34	41	7.54e-05	TGTAAATA	contains similarity to Brugia malayi Protein C17H12.11, putative.; TR:A8QCH9
WBGene00012424	dlc-3	Y10G11A.2a	53	60	2.17e-05	TGTACATA	C. elegans DLC-3 protein; contains similarity to Pfam domain PF01221 Dynein light chain type 1 contains similarity to Interpro domain IPR001372 (Dynein light chain, type 1 and 2)
WBGene00022460	Y110A7A.11	Y110A7A.11	31	38	7.54e-05	TGTAAATA	contains similarity to Brugia malayi Putative uncharacterized protein.; TR:A8P5R4
WBGene00022459	Y110A7A.9	Y110A7A.9a	41	48	7.54e-05	TGTAAATA	contains similarity to Interpro domains IPR001680 (WD40 repeat), IPR015943 (WD40/YVTN repeat-like)
			41	48	7.54e-05	TGTAAATA
			41	48	7.54e-05	TGTAAATA
WBGene00013766	Y113G7B.17	Y113G7B.17.1	116	123	4.79e-05	TGTATATA	contains similarity to Pfam domain PF08242 Methyltransferase domain contains similarity to Interpro domains IPR013217 (Methyltransferase type 12), IPR013126 (Heat shock protein 70)
WBGene00013805	Y116A8C.28	Y116A8C.28b	41	48	7.54e-05	TGTAAATA	contains similarity to Interpro domain IPR001765 (Carbonic anhydrase)
			41	48	7.54e-05	TGTAAATA
			41	48	7.54e-05	TGTAAATA
			41	48	7.54e-05	TGTAAATA
WBGene00022471	Y119C1B.5	Y119C1B.5	78	85	4.79e-05	TGTATATA	contains similarity to Pfam domain PF00097 Zinc finger, C3HC4 type (RING finger) contains similarity to Interpro domains IPR001841 (Zinc finger, RING-type), IPR013083 (Zinc finger, RING/FYVE/PHD-type), IPR011016 (Zinc finger, variant RING-type)
WBGene00000694	col-120	Y11D7A.11	34	41	7.54e-05	TGTAAATA	C. elegans COL-120 protein; contains similarity to Pfam domain PF01391 Collagen triple helix repeat (20 copies) contains similarity to Interpro domain IPR008160 (Collagen triple helix repeat)
WBGene00012444	Y15E3A.5	Y15E3A.5	238	245	7.54e-05	TGTAAATA	contains similarity to Vibrio marinus Fatty acid/phospholipid synthesis protein plsX.; SW:PLSX_VIBMA
			375	382	7.54e-05	TGTAAATA
			285	292	9.83e-05	TGTACAAA
WBGene00012459	Y17G7B.3	Y17G7B.3	235	242	9.83e-05	TGTACAAA	contains similarity to Pfam domain PF00753 Metallo-beta-lactamase superfamily contains similarity to Interpro domains IPR001279 (Beta-lactamase-like), IPR013126 (Heat shock protein 70)
WBGene00021206	memi-1	Y17G9B.9	141	148	4.79e-05	TGTATATA	memi-1 is enriched in the AFD and the germ line based on tiling array and RNA-seq studies; is affected by several genes including daf-2, glp-1, and skn-1 based on microarray and RNA-seq studies; is affected by eleven chemicals including Rotenone, manganese chloride, and Alovudine based on RNA-seq and microarray studies.
WBGene00003905	pad-1	Y18D10A.13	89	96	2.17e-05	TGTACATA	C. elegans PAD-1 protein; contains similarity to Pfam domain PF04118 Dopey, N-terminal contains similarity to Interpro domain IPR007249 (Dopey, N-terminal)
WBGene00021239	Y20F4.4	Y20F4.4	66	73	4.79e-05	TGTATATA	contains similarity to Homo sapiens Isoform 2 of Serine/arginine repetitive matrix protein 2; ENSEMBL:ENSP00000371738
WBGene00012529	Y32F6A.4	Y32F6A.4	100	107	9.83e-05	TGTACAAA	contains similarity to Pfam domain PF01490 Transmembrane amino acid transporter protein contains similarity to Interpro domain IPR013057 (Amino acid transporter, transmembrane)
WBGene00021316	Y32H12A.8	Y32H12A.8	198	205	4.79e-05	TGTATATA	contains similarity to Pfam domain PF00400 WD domain, G-beta repeat contains similarity to Interpro domains IPR001680 (WD40 repeat), IPR015943 (WD40/YVTN repeat-like)
WBGene00021334	vps-4	Y34D9A.10	60	67	7.54e-05	TGTAAATA	C. elegans VPS-4 protein; contains similarity to Pfam domains PF00004 (ATPase family associated with various cellular activities (AAA)) , PF09336 (Vps4 C terminal oligomerisation domain) , PF04212 (MIT (microtubule interacting and transport) domain) contains similarity to Interpro domains IPR003959 (AAA ATPase, core), IPR015415 (Vps4 oligomerisation, C-terminal), IPR003960 (AAA ATPase, conserved …
WBGene00021346	Y37E3.1	Y37E3.1	8	15	2.17e-05	TGTACATA	contains similarity to Pfam domain PF00515 Tetratricopeptide repeat contains similarity to Interpro domains IPR011990 (Tetratricopeptide-like helical), IPR008940 (Protein prenyltransferase), IPR001440 (Tetratricopeptide TPR-1), IPR013026 (Tetratricopeptide region)
WBGene00021389	Y38A10A.2	Y38A10A.2	79	86	4.79e-05	TGTATATA	contains similarity to Pfam domain PF02995 Protein of unknown function (DUF229) contains similarity to Interpro domain IPR004245 (Protein of unknown function DUF229)
WBGene00021402	Y38C1AA.12	Y38C1AA.12	1315	1322	7.54e-05	TGTAAATA	Y38C1AA.12 is an ortholog of human COPS3 (COP9 signalosome subunit 3); is predicted to encode a protein with the following domain: Domain of unknown function DUF4061.
WBGene00012606	Y38F1A.2	Y38F1A.2	44	51	9.83e-05	TGTACAAA	contains similarity to Pfam domain PF00097 Zinc finger, C3HC4 type (RING finger) contains similarity to Interpro domains IPR001841 (Zinc finger, RING-type), IPR013083 (Zinc finger, RING/FYVE/PHD-type)
WBGene00000870	cyd-1	Y38F1A.5.1	492	499	9.83e-05	TGTACAAA	C. elegans CYD-1 protein; contains similarity to Pfam domain PF00134 Cyclin, N-terminal domain contains similarity to Interpro domains IPR006670 (Cyclin), IPR013763 (Cyclin-related), IPR006671 (Cyclin, N-terminal)
WBGene00012610	Y38F1A.8	Y38F1A.8	62	69	2.17e-05	TGTACATA	contains similarity to Drosophila pseudoobscura RecName: Full=Post-GPI attachment to proteins factor 2;; SW:Q29M88
WBGene00012644	rabx-5	Y39A1A.5	38	45	7.54e-05	TGTAAATA	C. elegans RABX-5 protein; contains similarity to Pfam domains PF02204 (Vacuolar sorting protein 9 (VPS9) domain) , PF01754 (A20-like zinc finger) contains similarity to Interpro domains IPR013995 (Vacuolar sorting protein 9, subgroup), IPR003123 (Vacuolar sorting protein 9), IPR002653 (Zinc finger, A20-type)
WBGene00012646	Y39A1A.7	Y39A1A.7	17	24	2.17e-05	TGTACATA	contains similarity to Sus scrofa Lymphocyte antigen 64-like protein.; TR:Q7YRL4
WBGene00012648	Y39A1A.9	Y39A1A.9	188	195	2.17e-05	TGTACATA	contains similarity to Brugia malayi Putative uncharacterized protein.; TR:A8Q757
WBGene00004163	pqn-82	Y39A3CR.7	236	243	9.83e-05	TGTACAAA	C. elegans PQN-82 protein ; contains similarity to Nematostella vectensis Predicted protein.; TR:A7RLU4
WBGene00012717	Y39E4B.6	Y39E4B.6	129	136	7.54e-05	TGTAAATA	contains similarity to Rattus norvegicus Nucleolar protein NOP5 (Nucleolar protein 5) (Nopp140 associatedsprotein).; SW:NOP5_RAT
WBGene00021469	Y39G10AR.11	Y39G10AR.11.1	6	13	7.54e-05	TGTAAATA	contains similarity to Trichomonas vaginalis G3 Viral A-type inclusion protein, putative.; TR:A2DGN0
			6	13	7.54e-05	TGTAAATA
			6	13	7.54e-05	TGTAAATA
WBGene00021470	tpxl-1	Y39G10AR.12a	6	13	2.17e-05	TGTACATA	C. elegans TPXL-1 protein ; contains similarity to Homo sapiens Putative uncharacterized protein ENSP00000383309; ENSEMBL:ENSP00000383309
			186	193	7.54e-05	TGTAAATA
WBGene00012723	Y39G8B.2	Y39G8B.2	51	58	4.79e-05	TGTATATA	contains similarity to Pfam domain PF00248 Aldo/keto reductase family contains similarity to Interpro domain IPR001395 (Aldo/keto reductase)
WBGene00021485	Y40A1A.3	Y40A1A.3	659	666	2.17e-05	TGTACATA	Y40A1A.3 is enriched in the muscle cell based on microarray studies; is affected by several genes including clk-1, pgl-1, and alg-1 based on microarray and RNA-seq studies; is affected by four chemicals including tryptophan, D-glucose, and Colistin based on microarray and RNA-seq studies.
WBGene00012744	Y40H7A.4	Y40H7A.4b	37	44	7.54e-05	TGTAAATA	contains similarity to Pfam domain PF05050 Protein of unknown function (DUF672) contains similarity to Interpro domain IPR007744 (Protein of unknown function DUF672)
WBGene00012766	Y41E3.8	Y41E3.8	77	84	7.54e-05	TGTAAATA	contains similarity to Homo sapiens Isoform 1 of H/ACA ribonucleoprotein complex subunit 1; ENSEMBL:ENSP00000226796
WBGene00012776	Y42A5A.1	Y42A5A.1	306	313	7.54e-05	TGTAAATA	contains similarity to Pfam domain PF01433 Peptidase family M1 contains similarity to Interpro domains IPR014782 (Peptidase M1, membrane alanine aminopeptidase, N-terminal), IPR006025 (Peptidase M, neutral zinc metallopeptidases, zinc-binding site), IPR001930 (Peptidase M1, membrane alanine aminopeptidase)
WBGene00021539	Y42H9AR.4	Y42H9AR.4	460	467	7.54e-05	TGTAAATA	Y42H9AR.4 is enriched in the germ line based on RNA-seq studies; is affected by several genes including daf-12, gld-1, and hsf-1 based on tiling array, RNA-seq, and microarray studies; is affected by seven chemicals including D-glucose, Alovudine, and stavudine based on RNA-seq and microarray studies.
WBGene00004371	rig-4	Y42H9B.2	55	62	4.79e-05	TGTATATA	C. elegans RIG-4 protein; contains similarity to Pfam domains PF00047 (Immunoglobulin domain) (2), PF00041 (Fibronectin type III domain) (12), PF07679 (Immunoglobulin I-set domain) contains similarity to Interpro domains IPR003598 (Immunoglobulin subtype 2), IPR008957 (Fibronectin, type III-like fold), IPR003961 (Fibronectin, type III), IPR013098 (Immunoglobulin I-set), IPR013783 (Immunoglobulin-…
WBGene00012810	Y43F8A.3	Y43F8A.3	25	32	2.17e-05	TGTACATA	contains similarity to Pfam domain PF07859 alpha/beta hydrolase fold contains similarity to Interpro domains IPR017157 (Arylacetamide deacetylase), IPR013094 (Alpha/beta hydrolase fold-3)
WBGene00012850	Y44A6C.1	Y44A6C.1	70	77	2.17e-05	TGTACATA	contains similarity to Plasmodium falciparum Normocyte binding protein 2b.; TR:Q7YWE8
WBGene00012854	Y44A6D.3	Y44A6D.3	20	27	7.54e-05	TGTAAATA	contains similarity to Interpro domain IPR009057 (Homeodomain-like)
WBGene00012857	pbo-5	Y44A6E.1b	158	165	4.79e-05	TGTATATA	C. elegans PBO-5 protein; contains similarity to Pfam domains PF02931 (Neurotransmitter-gated ion-channel ligand binding domain) , PF02932 (Neurotransmitter-gated ion-channel transmembrane region) contains similarity to Interpro domains IPR006201 (Neurotransmitter-gated ion-channel), IPR006202 (Neurotransmitter-gated ion-channel ligand-binding), IPR006029 (Neurotransmitter-gated ion-channel trans…
WBGene00012868	tbc-9	Y45F10A.6b	102	109	2.17e-05	TGTACATA	C. elegans TBC-9 protein; contains similarity to Pfam domains PF02893 (GRAM domain) (2), PF00566 (TBC domain) contains similarity to Interpro domains IPR011992 (EF-Hand type), IPR002048 (Calcium-binding EF-hand), IPR000195 (RabGAP/TBC), IPR004182 (GRAM)
			42	49	7.54e-05	TGTAAATA
			102	109	2.17e-05	TGTACATA
			42	49	7.54e-05	TGTAAATA
WBGene00012869	Y45F10A.7	Y45F10A.7a	30	37	2.17e-05	TGTACATA	contains similarity to Pfam domains PF04784 (Protein of unknown function, DUF547) , PF00610 (Domain found in Dishevelled, Egl-10, and Pleckstrin) , PF00462 (Glutaredoxin) contains similarity to Interpro domains IPR002109 (Glutaredoxin), IPR011991 (Winged helix repressor DNA-binding), IPR012335 (Thioredoxin fold), IPR006869 (Protein of unknown function DUF547), IPR000591 (Pleckstrin/ G-protein, in…
WBGene00001635	gly-10	Y45F10D.3a	5	12	9.83e-05	TGTACAAA	C. elegans GLY-10 protein; contains similarity to Pfam domains PF00652 (Ricin-type beta-trefoil lectin domain) , PF00535 (Glycosyl transferase family 2) contains similarity to Interpro domains IPR000772 (Ricin B lectin), IPR001173 (Glycosyl transferase, family 2)
WBGene00012863	Y45F3A.8	Y45F3A.8	53	60	4.79e-05	TGTATATA	contains similarity to Pfam domain PF01549 ShK domain-like contains similarity to Interpro domain IPR003582 (Metridin-like ShK toxin)
WBGene00012907	cpt-1	Y46G5A.17.1	199	206	7.54e-05	TGTAAATA	C. elegans CPT-1 protein; contains similarity to Pfam domain PF00755 Choline/Carnitine o-acyltransferase contains similarity to Interpro domain IPR000542 (Acyltransferase ChoActase/COT/CPT)
WBGene00001632	gly-7	Y46H3A.6	57	64	2.17e-05	TGTACATA	C. elegans GLY-7 protein; contains similarity to Pfam domains PF00652 (Ricin-type beta-trefoil lectin domain) , PF00535 (Glycosyl transferase family 2) contains similarity to Interpro domains IPR000772 (Ricin B lectin), IPR001173 (Glycosyl transferase, family 2)
WBGene00012930	obr-1	Y47D3A.17d	179	186	4.79e-05	TGTATATA	C. elegans OBR-1 protein; contains similarity to Pfam domain PF01237 Oxysterol-binding protein contains similarity to Interpro domain IPR000648 (Oxysterol-binding protein)
WBGene00012933	Y47D3A.22	Y47D3A.22	42	49	7.54e-05	TGTAAATA	contains similarity to Pfam domains PF00097 (Zinc finger, C3HC4 type (RING finger)) , PF00023 (Ankyrin repeat) (8)contains similarity to Interpro domains IPR001841 (Zinc finger, RING-type), IPR001128 (Cytochrome P450), IPR013083 (Zinc finger, RING/FYVE/PHD-type), IPR002110 (Ankyrin)
WBGene00021629	scpl-3	Y47D9A.2a	26	33	2.17e-05	TGTACATA	C. elegans SCPL-3 protein; contains similarity to Pfam domain PF03031 NLI interacting factor-like phosphatase contains similarity to Interpro domains IPR011948 (Dullard-like phosphatase domain), IPR004274 (NLI interacting factor)
			26	33	2.17e-05	TGTACATA
WBGene00021644	Y47G6A.18.1	Y47G6A.18.1	262	269	2.17e-05	TGTACATA	Y47G6A.18 is an ortholog of human GOLPH3; is predicted to have phosphatidylinositol-4-phosphate binding activity.
WBGene00021645	Y47G6A.19	Y47G6A.19a	50	57	4.79e-05	TGTATATA	contains similarity to Pfam domains PF00246 (Zinc carboxypeptidase) , PF01549 (ShK domain-like) , PF02244 (Carboxypeptidase activation peptide) contains similarity to Interpro domains IPR003146 (Proteinase inhibitor, carboxypeptidase propeptide), IPR000834 (Peptidase M14, carboxypeptidase A), IPR003582 (Metridin-like ShK toxin)
			199	206	4.79e-05	TGTATATA
WBGene00021636	pcaf-1	Y47G6A.6	10	17	7.54e-05	TGTAAATA	C. elegans PCAF-1 protein; contains similarity to Pfam domains PF00439 (Bromodomain) , PF06466 (PCAF (P300/CBP-associated factor) N-terminal domain) , PF00583 (Acetyltransferase (GNAT) family) contains similarity to Interpro domains IPR009464 (PCAF, N-terminal), IPR000182 (GCN5-related N-acetyltransferase), IPR016181 (Acyl-CoA N-acyltransferase), IPR001487 (Bromodomain)
WBGene00012970	Y48A6B.9	Y48A6B.9	39	46	9.83e-05	TGTACAAA	contains similarity to Pfam domains PF00107 (Zinc-binding dehydrogenase) , PF08240 (Alcohol dehydrogenase GroES-like domain) contains similarity to Interpro domains IPR013149 (Alcohol dehydrogenase, zinc-binding), IPR013154 (Alcohol dehydrogenase GroES-like), IPR002085 (Alcohol dehydrogenase superfamily, zinc-containing), IPR016040 (NAD(P)-binding)
WBGene00000804	csc-1	Y48E1B.12.1	51	58	7.54e-05	TGTAAATA	C. elegans CSC-1 protein ;
WBGene00013008	clec-146	Y48E1B.9	38	45	7.54e-05	TGTAAATA	C. elegans CLEC-146 protein; contains similarity to Pfam domain PF00059 Lectin C-type domain contains similarity to Interpro domains IPR016186 (C-type lectin-like), IPR001304 (C-type lectin)
WBGene00021682	Y48G1C.9.2	Y48G1C.9.2	173	180	9.83e-05	TGTACAAA	Y48G1C.9 is an ortholog of human NAA38 (N(alpha)-acetyltransferase 38, NatC auxiliary subunit); is predicted to encode a protein with the following domains: LSM domain, eukaryotic/archaea-type and LSM domain superfamily
WBGene00013039	Y49E10.20	Y49E10.20.1	106	113	7.54e-05	TGTAAATA	contains similarity to Pfam domain PF01130 CD36 family contains similarity to Interpro domain IPR002159 (CD36 antigen)
WBGene00021158	Y4C6B.4	Y4C6B.4a	423	430	7.54e-05	TGTAAATA	contains similarity to Pfam domain PF07690 Major Facilitator Superfamily contains similarity to Interpro domains IPR007114 (Major facilitator superfamily), IPR011701 (Major facilitator superfamily MFS-1)
WBGene00021159	Y4C6B.5	Y4C6B.5	74	81	4.79e-05	TGTATATA	contains similarity to Pfam domain PF07690 Major Facilitator Superfamily contains similarity to Interpro domain IPR011701 (Major facilitator superfamily MFS-1)
WBGene00013080	Y51A2D.13	Y51A2D.13a	60	67	2.17e-05	TGTACATA	contains similarity to Pfam domains PF08371 (Phospholipase D/viral envelope) , PF00614 (Phospholipase D Active site motif) (2)contains similarity to Interpro domains IPR013582 (Phospholipase D/viral envelope), IPR001736 (Phospholipase D/Transphosphatidylase)
WBGene00013132	strd-1	Y52D3.1a.1	59	66	7.54e-05	TGTAAATA	C. elegans STRD-1 protein; contains similarity to Pfam domain PF00069 Protein kinase domain contains similarity to Interpro domains IPR002290 (Serine/threonine protein kinase), IPR000719 (Protein kinase, core), IPR001245 (Tyrosine protein kinase), IPR017442 (Serine/threonine protein kinase-related)
WBGene00013161	Y53F4B.14	Y53F4B.14	66	73	9.83e-05	TGTACAAA	contains similarity to Deinococcus radiodurans Hexagonally packed intermediate-layer surface protein precursor.; SW:HPI2_DEIRA
WBGene00021841	Y54E10BR.2	Y54E10BR.2.1	14	21	4.79e-05	TGTATATA	contains similarity to Pfam domain PF00025 ADP-ribosylation factor family contains similarity to Interpro domains IPR006687 (GTP-binding protein SAR1), IPR005225 (Small GTP-binding protein), IPR001806 (Ras GTPase), IPR003579 (Ras small GTPase, Rab type), IPR006688 (ADP-ribosylation factor), IPR006689 (ARF/SAR superfamily)
			14	21	4.79e-05	TGTATATA
			14	21	4.79e-05	TGTATATA
WBGene00013202	Y54E5A.7	Y54E5A.7	140	147	4.79e-05	TGTATATA	contains similarity to Pfam domain PF00622 SPRY domain contains similarity to Interpro domains IPR001870 (B302, (SPRY)-like), IPR006594 (LisH dimerisation motif), IPR006595 (CTLH, C-terminal to LisH motif), IPR003877 (SPla/RYanodine receptor SPRY)
WBGene00013219	Y54G11A.11	Y54G11A.11.1	211	218	7.54e-05	TGTAAATA	contains similarity to Pfam domain PF05129 Transcription elongation factor Elf1 like contains similarity to Interpro domain IPR007808 (Protein of unknown function DUF701, zinc-binding putative)
			211	218	7.54e-05	TGTAAATA
			211	218	7.54e-05	TGTAAATA
WBGene00000830	ctl-1	Y54G11A.6	22	29	4.79e-05	TGTATATA	C. elegans CTL-1 protein; contains similarity to Pfam domain PF00199 Catalase contains similarity to Interpro domains IPR002226 (Catalase), IPR011614 (Catalase, N-terminal)
WBGene00021876	Y54G2A.11	Y54G2A.11a	151	158	7.54e-05	TGTAAATA	contains similarity to Interpro domain IPR001005 (SANT, DNA-binding)
			100	107	9.83e-05	TGTACAAA
			151	158	7.54e-05	TGTAAATA
			100	107	9.83e-05	TGTACAAA
WBGene00021906	Y55B1AR.2	Y55B1AR.2a	475	482	4.79e-05	TGTATATA	Y55B1AR.2 is enriched in the germ line, the nervous system, and the sensillum based on microarray and RNA-seq studies; is affected by several genes including daf-12, let-7, and gld-1 based on tiling array, proteomic, RNA-seq, and microarray studies; is affected by four chemicals including bisphenol S, Zidovudine, and paraquat based on RNA-seq and microarray studies.
WBGene00021945	Y55F3BR.8	Y55F3BR.8a	105	112	7.54e-05	TGTAAATA	contains similarity to Pfam domain PF00023 Ankyrin repeat contains similarity to Interpro domain IPR002110 (Ankyrin)
WBGene00021952	vha-19	Y55H10A.1	411	418	7.54e-05	TGTAAATA	C. elegans VHA-19 protein; contains similarity to Pfam domain PF05827 Vacuolar ATP synthase subunit S1 (ATP6S1) contains similarity to Interpro domain IPR008388 (ATPase, V1 complex, subunit S1)
WBGene00013259	Y57A10A.16	Y57A10A.16	52	59	7.54e-05	TGTAAATA	contains similarity to Pfam domain PF04051 Transport protein particle (TRAPP) component, Bet3 contains similarity to Interpro domains IPR007194 (Transport protein particle (TRAPP) component, Bet3), IPR016696 (TRAPP I complex, Trs31)
WBGene00021956	Y57E12AL.1	Y57E12AL.1a	69	76	4.79e-05	TGTATATA	contains similarity to Pfam domain PF03348 Serine incorporator (Serinc) contains similarity to Interpro domain IPR005016 (TMS membrane protein/tumour differentially expressed protein)
			69	76	4.79e-05	TGTATATA
WBGene00013302	Y57G11C.4	Y57G11C.4	143	150	4.79e-05	TGTATATA	contains similarity to Pfam domain PF05008 Vesicle transport v-SNARE protein contains similarity to Interpro domains IPR000727 (Target SNARE coiled-coil region), IPR007705 (Vesicle transport v-SNARE)
WBGene00008441	usp-50	E01B7.1	32	39	2.17e-05	TGTACATA	usp-50 is predicted to have thiol-dependent ubiquitinyl hydrolase activity
WBGene00013354	Y59A8B.22	Y59A8B.22.1	78	85	2.17e-05	TGTACATA	contains similarity to Pfam domains PF09325 (Vps5 C terminal like) , PF00787 (PX domain) contains similarity to Interpro domains IPR001683 (Phox-like), IPR015404 (Vps5 C terminal like)
			78	85	2.17e-05	TGTACATA
WBGene00012383	ttr-17	Y5F2A.2.1	35	42	2.17e-05	TGTACATA	C. elegans TTR-17 protein; contains similarity to Pfam domain PF01060 Transthyretin-like family contains similarity to Interpro domain IPR001534 (Transthyretin-like)
WBGene00013379	Y62E10A.13d	Y62E10A.13d	15	22	2.17e-05	TGTACATA	Y62E10A.13 is an ortholog of human PSPH (phosphoserine phosphatase); is predicted to have phosphoserine phosphatase activity; is expressed in the head and the intestine; human orthologs of this gene are implicated in PSPH deficiency.
WBGene00013380	Y62E10A.14	Y62E10A.14	29	36	2.17e-05	TGTACATA	contains similarity to Dictyostelium discoideum Similar to Dictyostelium discoideum (Slime mold). R2005 protein.; TR:Q86KG7
			127	134	4.79e-05	TGTATATA
WBGene00022026	Y65B4A.2	Y65B4A.2	23	30	7.54e-05	TGTAAATA	contains similarity to Pfam domain PF00112 Papain family cysteine protease contains similarity to Interpro domains IPR013128 (Peptidase C1A, papain), IPR000668 (Peptidase C1A, papain C-terminal)
WBGene00001725	grl-16	Y65B4BR.6a	203	210	9.83e-05	TGTACAAA	C. elegans GRL-16 protein; contains similarity to Pfam domain PF04155 Ground-like domain contains similarity to Interpro domain IPR007284 (Ground-like region)
WBGene00022043	Y65B4BR.8	Y65B4BR.8	50	57	7.54e-05	TGTAAATA	contains similarity to Pfam domain PF06425 Partner of SLD five, PSF3 contains similarity to Interpro domain IPR010492 (GINS complex, Psf3 component)
WBGene00013436	Y66D12A.10	Y66D12A.10	52	59	7.54e-05	TGTAAATA	contains similarity to Rattus norvegicus RecName: Full=MIT domain-containing protein 1;; SW:Q5I0J5
WBGene00022048	fln-1	Y66H1B.2	30	37	2.17e-05	TGTACATA	fln-1 is an ortholog of human FLNA, FLNB, and FLNC; is involved in several processes, including actin filament organization, neuron development, and semaphorin-plexin signaling pathway; localizes to the actin filament; is expressed in several tissues, including the hypodermis, the intestine, the muscular system, the nervous system, and the reproductive system
WBGene00022051	rep-1	Y67D2.1a.1	82	89	7.54e-05	TGTAAATA	rep-1 is an ortholog of human CHML and chm; is predicted to have GTPase activator activity and Rab GDP-dissociation inhibitor activity; is expressed in several tissues, including the epithelial system, the muscular system, and the nervous system; human orthologs of this gene are implicated in choroideremia
WBGene00013465	Y67H2A.10	Y67H2A.10	4	11	4.79e-05	TGTATATA	contains similarity to Pfam domain PF00096 Zinc finger, C2H2 type contains similarity to Interpro domains IPR015880 (Zinc finger, C2H2-like), IPR007087 (Zinc finger, C2H2-type)
WBGene00013462	Y67H2A.4	Y67H2A.4a	17	24	7.54e-05	TGTAAATA	contains similarity to Pfam domain PF00036 EF hand contains similarity to Interpro domains IPR011992 (EF-Hand type), IPR002048 (Calcium-binding EF-hand)
WBGene00021170	arx-4	Y6D11A.2	2	9	9.83e-05	TGTACAAA	C. elegans ARX-4 protein; contains similarity to Pfam domain PF04045 Arp2/3 complex, 34 kD subunit p34-Arc contains similarity to Interpro domain IPR007188 (Arp2/3 complex, 34kDa subunit p34-Arc)
WBGene00003702	nhr-112	Y70C5C.6b	25	32	7.54e-05	TGTAAATA	C. elegans NHR-112 protein; contains similarity to Pfam domain PF00104 Ligand-binding domain of nuclear hormone receptor contains similarity to Interpro domain IPR000536 (Nuclear hormone receptor, ligand-binding, core)
WBGene00003111	mab-20	Y71G12B.20a	180	187	4.79e-05	TGTATATA	C. elegans MAB-20 protein; contains similarity to Pfam domains PF01437 (Plexin repeat) , PF07679 (Immunoglobulin I-set domain) , PF01403 (Sema domain) contains similarity to Interpro domains IPR002165 (Plexin), IPR013098 (Immunoglobulin I-set), IPR013783 (Immunoglobulin-like fold), IPR001627 (Semaphorin/CD100 antigen), IPR015943 (WD40/YVTN repeat-like)
			273	280	4.79e-05	TGTATATA
WBGene00013515	Y73F4A.2	Y73F4A.2	49	56	7.54e-05	TGTAAATA	contains similarity to Pfam domain PF03351 DOMON domain contains similarity to Interpro domains IPR005018 (DOMON related), IPR013050 (DOMON)
WBGene00022280	Y74C10AL.2.1	Y74C10AL.2.1	155	162	7.54e-05	TGTAAATA	Y74C10AL.2 is an ortholog of human TMEM50A; is predicted to encode a protein with the following domain
WBGene00022279	sesn-1	Y74C9A.5	453	460	9.83e-05	TGTACAAA	C. elegans SESN-1 protein; contains similarity to Pfam domain PF04636 PA26 p53-induced protein (sestrin) contains similarity to Interpro domain IPR006730 (PA26 p53-induced protein (sestrin))
WBGene00022283	lgc-27	Y74E4A.1a	91	98	7.54e-05	TGTAAATA	C. elegans LGC-27 protein; contains similarity to Pfam domain PF02931 Neurotransmitter-gated ion-channel ligand binding domain contains similarity to Interpro domains IPR006201 (Neurotransmitter-gated ion-channel), IPR006202 (Neurotransmitter-gated ion-channel ligand-binding)
			91	98	7.54e-05	TGTAAATA
WBGene00022287	Y75B7AR.1	Y75B7AR.1	27	34	2.17e-05	TGTACATA	Y75B7AR.1 is enriched in several tissues, including the muscular system, the nervous system, and the pharynx based on Chronogram, microarray, and tiling array studies; is affected by several genes including daf-16, daf-2, and glp-1 based on microarray and RNA-seq studies; is affected by fifteen chemicals including 1-methylnicotinamide, nicotinic acid, and Mercuric Chloride based on RNA-seq and mi…
WBGene00013577	Y76A2B.5	Y76A2B.5	202	209	7.54e-05	TGTAAATA	contains similarity to Danio rerio Zgc:91819 protein.; TR:Q6GMH4
WBGene00013578	Y76A2B.6	Y76A2B.6	78	85	7.54e-05	TGTAAATA	contains similarity to Pfam domain PF01130 CD36 family contains similarity to Interpro domain IPR002159 (CD36 antigen)
WBGene00022307	Y77E11A.2	Y77E11A.2	78	85	2.17e-05	TGTACATA	contains similarity to Pfam domain PF01513 ATP-NAD kinase contains similarity to Interpro domains IPR002504 (ATP-NAD/AcoX kinase), IPR017437 (ATP-NAD kinase, PpnK-type, all-beta), IPR017438 (ATP-NAD kinase, PpnK-type, alpha/beta)
WBGene00000273	brp-1	Y79H2A.1a.1	124	131	7.54e-05	TGTAAATA	C. elegans BRP-1 protein ; contains similarity to Nematostella vectensis Predicted protein.; TR:A7RLU4
			124	131	7.54e-05	TGTAAATA
			124	131	7.54e-05	TGTAAATA
			124	131	7.54e-05	TGTAAATA
			124	131	7.54e-05	TGTAAATA
WBGene00012420	Y7A9D.1	Y7A9D.1	116	123	2.17e-05	TGTACATA	contains similarity to Interpro domains IPR001092 (Basic helix-loop-helix dimerisation region bHLH), IPR011598 (Helix-loop-helix DNA-binding)
WBGene00013591	Y81G3A.3	Y81G3A.3	219	226	7.54e-05	TGTAAATA	contains similarity to Pfam domains PF05773 (RWD domain) , PF00069 (Protein kinase domain) contains similarity to Interpro domains IPR017441 (Protein kinase ATP binding, conserved site), IPR002290 (Serine/threonine protein kinase), IPR008271 (Serine/threonine protein kinase, active site), IPR000719 (Protein kinase, core), IPR006575 (RWD), IPR016135 (Ubiquitin-conjugating enzyme/RWD-like), IPR0012…
WBGene00013598	vps-28	Y87G2A.10.1	13	20	7.54e-05	TGTAAATA	vps-28 is an ortholog of human VPS28 (VPS28, ESCRT-I subunit); is involved in receptor catabolic process; localizes to the ESCRT I complex
WBGene00013603	Y87G2A.17	Y87G2A.17	255	262	7.54e-05	TGTAAATA	contains similarity to Pfam domain PF00017 SH2 domain contains similarity to Interpro domain IPR000980 (SH2 motif)
WBGene00004277	rab-18	Y92C3B.3b	1202	1209	9.83e-05	TGTACAAA	C. elegans RAB-18 protein; contains similarity to Pfam domain PF00071 Ras family contains similarity to Interpro domains IPR002041 (Ran GTPase), IPR003577 (Ras small GTPase, Ras type), IPR003578 (Ras small GTPase, Rho type), IPR005225 (Small GTP-binding protein), IPR001806 (Ras GTPase), IPR003579 (Ras small GTPase, Rab type), IPR006688 (ADP-ribosylation factor), IPR013753 (Ras), IPR002078 (RNA po…
WBGene00022401	Y97E10AR.6	Y97E10AR.6	157	164	4.79e-05	TGTATATA	contains similarity to Pfam domain PF03909 BSD domain contains similarity to Interpro domain IPR005607 (BSD)
			223	230	7.54e-05	TGTAAATA
WBGene00013852	hhat-1	ZC101.3	38	45	7.54e-05	TGTAAATA	C. elegans HHAT-1 protein; contains similarity to Pfam domain PF03062 MBOAT family contains similarity to Interpro domain IPR004299 (Membrane bound O-acyl transferase, MBOAT)
WBGene00003104	mab-7	ZC13.4	208	215	9.83e-05	TGTACAAA	C. elegans MAB-7 protein; contains similarity to Pfam domains PF00008 (EGF-like domain) , PF08768 (Domain of unknown function (DUF1794)) contains similarity to Interpro domains IPR000742 (EGF-like, type 3), IPR006209 (EGF-like), IPR006210 (EGF), IPR013032 (EGF-like region, conserved site), IPR014878 (Region of unknown function DUF1794)
WBGene00022550	ZC196.6	ZC196.6	49	56	7.54e-05	TGTAAATA	contains similarity to Mycoplasma genitalium RecName: Full=Protein P200;; SW:Q49429
WBGene00001596	gld-2	ZC308.1a	476	483	9.83e-05	TGTACAAA	C. elegans GLD-2 protein; contains similarity to Pfam domain PF03828 Poly(A) polymerase contains similarity to Interpro domain IPR002058 (PAP/25A-associated)
WBGene00022592	ZC328.2	ZC328.2	25	32	7.54e-05	TGTAAATA	contains similarity to Pfam domain PF00096 Zinc finger, C2H2 type contains similarity to Interpro domains IPR015880 (Zinc finger, C2H2-like), IPR013087 (Zinc finger, C2H2-type/integrase, DNA-binding), IPR007087 (Zinc finger, C2H2-type)
WBGene00022593	ZC328.3	ZC328.3a	28	35	7.54e-05	TGTAAATA	contains similarity to Pfam domain PF02893 GRAM domain contains similarity to Interpro domain IPR004182 (GRAM)
WBGene00013869	ZC373.4	ZC373.4	302	309	7.54e-05	TGTAAATA	contains similarity to Pfam domain PF00069 Protein kinase domain contains similarity to Interpro domains IPR017441 (Protein kinase ATP binding, conserved site), IPR002290 (Serine/threonine protein kinase), IPR008271 (Serine/threonine protein kinase, active site), IPR000719 (Protein kinase, core), IPR001245 (Tyrosine protein kinase), IPR017442 (Serine/threonine protein kinase-related)
WBGene00006590	toc-1	ZC395.3b	123	130	2.17e-05	TGTACATA	C. elegans TOC-1 protein; contains similarity to Pfam domain PF01545 Cation efflux family contains similarity to Interpro domains IPR002395 (HMW kininogen), IPR002524 (Cation efflux protein)
WBGene00022597	ZC395.5	ZC395.5	64	71	7.54e-05	TGTAAATA	ZC395.5 is enriched in GABAergic neurons, the ASER, the PLM, and the intestine based on tiling array, RNA-seq, and microarray studies; is affected by several genes including daf-16, daf-2, and let-60 based on microarray and RNA-seq studies; is affected by sixteen chemicals including methylmercuric chloride, Rotenone, and Mianserin based on microarray and RNA-seq studies.
WBGene00013898	ZC443.3	ZC443.3.1	194	201	2.17e-05	TGTACATA	contains similarity to Saccharomyces cerevisiae Essential protein involved in intracellular protein transport, coiled-coil protein necessary for transport from ER to Golgi; required for assembly of the ER-to-Golgi SNARE complex; SGD:YDL058W
WBGene00003865	oma-2	ZC513.6	91	98	7.54e-05	TGTAAATA	C. elegans OMA-2 protein; contains similarity to Pfam domain PF00642 Zinc finger C-x8-C-x5-C-x3-H type (and similar) contains similarity to Interpro domain IPR000571 (Zinc finger, CCCH-type)
WBGene00004174	abu-14	ZK1067.7	119	126	7.54e-05	TGTAAATA	abu-14 is involved in pharynx development; is expressed in the buccal cavity, the cuticle, the grinder, the marginal cell, and the pharyngeal muscle cell
WBGene00003559	ncl-1	ZK112.2	1502	1509	7.54e-05	TGTAAATA	C. elegans NCL-1 protein; contains similarity to Pfam domains PF00643 (B-box zinc finger) (2), PF01436 (NHL repeat) (5)contains similarity to Interpro domains IPR003649 (B-box, C-terminal), IPR011042 (Six-bladed beta-propeller, TolB-like), IPR000315 (Zinc finger, B-box), IPR013017 (NHL repeat, subgroup), IPR015943 (WD40/YVTN repeat-like), IPR007087 (Zinc finger, C2H2-type), IPR001258 (NHL repeat)
WBGene00023405	sor-1	ZK1236.3a	21	28	7.54e-05	TGTAAATA	C. elegans SOR-1 protein ; contains similarity to Homo sapiens Isoform 1 of PAX-interacting protein 1; ENSEMBL:ENSP00000319149
WBGene00022865	ZK1236.7	ZK1236.7.1	23	30	2.17e-05	TGTACATA	contains similarity to Brugia malayi Protein C20orf116 homolog, putative.; TR:A8QFY9
WBGene00022866	ZK1240.1	ZK1240.1	55	62	9.83e-05	TGTACAAA	contains similarity to Pfam domain PF00097 Zinc finger, C3HC4 type (RING finger) contains similarity to Interpro domains IPR001841 (Zinc finger, RING-type), IPR013083 (Zinc finger, RING/FYVE/PHD-type), IPR000315 (Zinc finger, B-box)
WBGene00022867	ZK1240.2	ZK1240.2	27	34	7.54e-05	TGTAAATA	contains similarity to Pfam domain PF00097 Zinc finger, C3HC4 type (RING finger) contains similarity to Interpro domains IPR001841 (Zinc finger, RING-type), IPR013083 (Zinc finger, RING/FYVE/PHD-type), IPR000315 (Zinc finger, B-box)
WBGene00005026	sqv-8	ZK1307.5	80	87	9.83e-05	TGTACAAA	C. elegans SQV-8 protein; contains similarity to Pfam domains PF04977 (Septum formation initiator) , PF03360 (Glycosyltransferase family 43) contains similarity to Interpro domains IPR007060 (Septum formation initiator), IPR005027 (Glycosyl transferase, family 43)
WBGene00013934	ZK131.11	ZK131.11b	271	278	7.54e-05	TGTAAATA	contains similarity to Saccharomyces cerevisiae Protein of unknown function, required for normal growth rate at 15 degrees C; green fluorescent protein (GFP)-fusion protein localizes to the cytoplasm in a punctate pattern; SGD:YBR255W
WBGene00022679	ZK180.5	ZK180.5a	137	144	4.79e-05	TGTATATA	contains similarity to Dolomedes tenebrosus Fibroin 2 (Fragment).; TR:Q9BIU3
			137	144	4.79e-05	TGTATATA
			137	144	4.79e-05	TGTATATA
WBGene00013926	nep-1	ZK20.6.1	101	108	4.79e-05	TGTATATA	C. elegans NEP-1 protein; contains similarity to Pfam domains PF05649 (Peptidase family M13) , PF01431 (Peptidase family M13) contains similarity to Interpro domains IPR006025 (Peptidase M, neutral zinc metallopeptidases, zinc-binding site), IPR000718 (Peptidase M13, neprilysin), IPR008753 (Peptidase M13)
WBGene00013955	kri-1	ZK265.1b	380	387	7.54e-05	TGTAAATA	C. elegans KRI-1 protein; contains similarity to Pfam domains PF00373 (FERM central domain) , PF00023 (Ankyrin repeat) (3)contains similarity to Interpro domains IPR002110 (Ankyrin), IPR000299 (Band 4.1, N-terminal)
WBGene00013964	ZK287.3	ZK287.3	100	107	4.79e-05	TGTATATA	contains similarity to Rhodopirellula baltica Probable DEAH ATP-dependent helicase.; TR:Q7UYP6
WBGene00000874	cyk-3	ZK328.1a	125	132	7.54e-05	TGTAAATA	C. elegans CYK-3 protein; contains similarity to Pfam domains PF00443 (Ubiquitin carboxyl-terminal hydrolase) , PF00036 (EF hand) contains similarity to Interpro domains IPR011992 (EF-Hand type), IPR002048 (Calcium-binding EF-hand), IPR001394 (Peptidase C19, ubiquitin carboxyl-terminal hydrolase 2), IPR006615 (Ubiquitin carboxyl-terminal hydrolase, N-terminal region 1)
WBGene00022712	ZK355.2	ZK355.2a.1	414	421	2.17e-05	TGTACATA	ZK355.2 is enriched in the Z1, the Z4, the body wall musculature, the intestine, and the nervous system based on RNA-seq and microarray studies; is affected by several genes including daf-2, clk-1, and sir-2.1 based on microarray and RNA-seq studies; is affected by five chemicals including methylmercuric chloride, Cry5B, and single-walled carbon nanotube based on microarray and RNA-seq studies.
WBGene00022719	pdhk-2	ZK370.5.1	141	148	4.79e-05	TGTATATA	C. elegans PDHK-2 protein; contains similarity to Pfam domain PF02518 Histidine kinase-, DNA gyrase B-, and HSP90-like ATPase contains similarity to Interpro domains IPR005467 (Signal transduction histidine kinase, core), IPR003594 (ATP-binding region, ATPase-like)
			223	230	4.79e-05	TGTATATA
WBGene00022748	oaz-1	ZK484.1.1	185	192	9.83e-05	TGTACAAA	oaz-1 is an ortholog of human OAZ1, OAZ2, and OAZ3; is predicted to have ornithine decarboxylase inhibitor activity; is expressed in the spermathecal-uterine valve cell.
		ZK484.1.2	185	192	9.83e-05	TGTACAAA
WBGene00013982	ZK512.1	ZK512.1	61	68	7.54e-05	TGTAAATA	contains similarity to Interpro domain IPR007110 (Immunoglobulin-like)
WBGene00006602	tps-1	ZK54.2b.1	200	207	7.54e-05	TGTAAATA	C. elegans TPS-1 protein; contains similarity to Pfam domain PF00982 Glycosyltransferase family 20 contains similarity to Interpro domain IPR001830 (Glycosyl transferase, family 20)
			200	207	7.54e-05	TGTAAATA
			200	207	7.54e-05	TGTAAATA
WBGene00006619	try-1	ZK546.15	40	47	2.17e-05	TGTACATA	C. elegans TRY-1 protein; contains similarity to Pfam domain PF00089 Trypsin contains similarity to Interpro domains IPR001314 (Peptidase S1A, chymotrypsin), IPR001254 (Peptidase S1 and S6, chymotrypsin/Hap)
WBGene00001017	dnc-1	ZK593.5	130	137	7.54e-05	TGTAAATA	C. elegans DNC-1 protein; contains similarity to Pfam domain PF01302 CAP-Gly domain contains similarity to Interpro domain IPR000938 (Cytoskeleton-associated protein, CAP-Gly)
WBGene00002981	lgg-2	ZK593.6.1	107	114	7.54e-05	TGTAAATA	C. elegans LGG-2 protein; contains similarity to Pfam domain PF02991 Microtubule associated protein 1A/1B, light chain 3 contains similarity to Interpro domain IPR004241 (Light chain 3 (LC3))
			107	114	7.54e-05	TGTAAATA
WBGene00014030	glb-1	ZK637.13.1	83	90	9.83e-05	TGTACAAA	C. elegans GLB-1 protein; contains similarity to Pfam domain PF00042 Globin contains similarity to Interpro domains IPR012292 (Globin), IPR000971 (Globin, subset), IPR012085 (Globin, nematode)
			83	90	9.83e-05	TGTACAAA
WBGene00014036	ZK643.5	ZK643.5	43	50	9.83e-05	TGTACAAA	contains similarity to Brugia malayi Putative uncharacterized protein.; TR:A8NZV2
WBGene00014051	tag-341	ZK669.1a	387	394	7.54e-05	TGTAAATA	C. elegans TAG-341 protein; contains similarity to Pfam domains PF00620 (RhoGAP domain) , PF00130 (Phorbol esters/diacylglycerol binding domain (C1 domain)) contains similarity to Interpro domains IPR001060 (Cdc15/Fes/CIP4), IPR002219 (Protein kinase C, phorbol ester/diacylglycerol binding), IPR000198 (RhoGAP)
WBGene00014053	ZK669.3	ZK669.3	15	22	7.54e-05	TGTAAATA	contains similarity to Pfam domain PF03227 Gamma interferon inducible lysosomal thiol reductase (GILT) contains similarity to Interpro domain IPR004911 (Gamma interferon inducible lysosomal thiol reductase GILT)
WBGene00014057	ZK673.1	ZK673.1	52	59	7.54e-05	TGTAAATA	contains similarity to Pfam domain PF01549 ShK domain-like contains similarity to Interpro domain IPR003582 (Metridin-like ShK toxin)
WBGene00014062	ZK673.6	ZK673.6	11	18	9.83e-05	TGTACAAA	contains similarity to Hydra attenuata Myosin heavy chain, clone 203 (Fragment).; SW:MYS3_HYDAT
WBGene00006950	wrt-4	ZK678.5.1	30	37	9.83e-05	TGTACAAA	C. elegans WRT-4 protein; contains similarity to Pfam domain PF01079 Hint module contains similarity to Interpro domains IPR003586 (Hedgehog/intein hint domain, C-terminal), IPR001657 (Peptidase C46, hedgehog protein), IPR006141 (Intein splicing site), IPR003587 (Hedgehog/intein hint, N-terminal), IPR001767 (Peptidase C46, hedgehog protein, hint region)
			30	37	9.83e-05	TGTACAAA
WBGene00022791	ZK686.1	ZK686.1	130	137	2.17e-05	TGTACATA	contains similarity to Interpro domain IPR004038 (Ribosomal protein L7Ae/L30e/S12e/Gadd45)
WBGene00022798	ZK688.3	ZK688.3.1	27	34	7.54e-05	TGTAAATA	contains similarity to Pfam domain PF01557 Fumarylacetoacetate (FAA) hydrolase family contains similarity to Interpro domains IPR010916 (TonB box, conserved site), IPR011234 (Fumarylacetoacetase, C-terminal-related), IPR002529 (Fumarylacetoacetase, C-terminal-like)
WBGene00006477	chup-1	ZK721.1	6	13	4.79e-05	TGTATATA	chup-1 is an ortholog of human SIDT1 and SIDT2; exhibits cholesterol binding activity; is involved in cholesterol import; localizes to the cytoplasmic part, intracellular organelle, and plasma membrane; is expressed in several tissues, including the alimentary system, the embryonic cell, the epithelial system, the muscular system, and the reproductive system
WBGene00022817	upp-1	ZK783.2.1	167	174	7.54e-05	TGTAAATA	C. elegans UPP-1 protein; contains similarity to Pfam domain PF01048 Phosphorylase family contains similarity to Interpro domains IPR010059 (Uridine phosphorylase, eukaryotic), IPR000845 (Nucleoside phosphorylase)
WBGene00014109	ZK856.8	ZK856.8.1	58	65	2.17e-05	TGTACATA	contains similarity to Pfam domain PF00036 EF hand contains similarity to Interpro domains IPR011992 (EF-Hand type), IPR002048 (Calcium-binding EF-hand)
WBGene00014125	ZK863.8	ZK863.8	222	229	7.54e-05	TGTAAATA	contains similarity to Homo sapiens Similar to RIKEN cDNA 2310010M24 gene; ENSEMBL:ENSP00000280115
WBGene00014151	ZK930.1	ZK930.1	17	24	7.54e-05	TGTAAATA	contains similarity to Pfam domains PF02985 (HEAT repeat) , PF00400 (WD domain, G-beta repeat) (2)contains similarity to Interpro domains IPR002290 (Serine/threonine protein kinase), IPR008271 (Serine/threonine protein kinase, active site), IPR000719 (Protein kinase, core), IPR000357 (HEAT), IPR001680 (WD40 repeat), IPR015943 (WD40/YVTN repeat-like)
WBGene00014164	lact-2	ZK945.1	27	34	2.17e-05	TGTACATA	C. elegans LACT-2 protein; contains similarity to Pfam domain PF00144 Beta-lactamase contains similarity to Interpro domain IPR001466 (Beta-lactamase)
WBGene00022832	ZK973.3	ZK973.3	141	148	4.79e-05	TGTATATA	contains similarity to Pfam domain PF00481 Protein phosphatase 2C contains similarity to Interpro domains IPR001932 (Protein phosphatase 2C-related), IPR000222 (), IPR014045 (Protein phosphatase 2C, N-terminal), IPR015655 (Protein phosphatase 2C)
WBGene00000140	anc-1	ZK973.6	147	154	7.54e-05	TGTAAATA	C. elegans ANC-1 protein; contains similarity to Pfam domain PF00307 Calponin homology (CH) domain contains similarity to Interpro domains IPR016146 (Calponin-homology), IPR001715 (Calponin-like actin-binding), IPR012315 (Klarsicht/ANC-1/syne-1 homology), IPR001589 (Actinin-type, actin-binding, conserved site)
