# Supplementary material for: Dose-Dependent Effects of GLD-2 and GLD-1 on Germline Differentiation and Dedifferentiation in the Absence of PUF-8
Source: Front Cell Dev Biol. 2020 Jan 24;8:5. doi: 10.3389/fcell.2020.00005 (PMC6992537; doi:10.3389/fcell.2020.00005)
Supplement: Supplementary file 3 [file Table_2.xlsx]

## Sheet: Sheet1
Table S2. Gene Ontology (GO) database
1	cellular component organization or biogenesis (GO:0071840)	129	0.079	0.07
2	cellular process (GO:0009987)	569	0.347	0.308
3	localization (GO:0051179)	171	0.104	0.093
4	reproduction (GO:0000003)	8	0.005	0.004
5	biological regulation (GO:0065007)	164	0.1	0.089
6	response to stimulus (GO:0050896)	140	0.085	0.076
7	developmental process (GO:0032502)	35	0.021	0.019
8	rhythmic process (GO:0048511)	2	0.001	0.001
9	multicellular organismal process (GO:0032501)	84	0.051	0.045
10	biological adhesion (GO:0022610)	7	0.004	0.004
11	locomotion (GO:0040011)	11	0.007	0.006
12	metabolic process (GO:0008152)	500	0.305	0.271
13	immune system process (GO:0002376)	27	0.016	0.015
